# Supplementary material for: Target and identify: triazene linker helps identify azidation sites of labelled proteins via click and cleave strategy
Source: Royal Society of Chemistry journal article supplement (doi:10.1039/c7cc07001b), 2017-01-01
Supplement: c7cc07001b1.xlsx [file c7cc07001b1.xlsx]

## Sheet: Strp-DtBio_ClinkerPD Evidence
Sequence	Length	Modifications	Modified sequence	ClinkerFragment->Lys Probabilities	Oxidation (M) Probabilities	ClinkerFragment->Lys Score Diffs	Oxidation (M) Score Diffs	Acetyl (Protein N-term)	ClinkerFragment->Lys	ClinkerFragment->N-term	Oxidation (M)	Missed cleavages	Proteins	Leading proteins	Leading razor protein	Type	Raw file	Experiment	MS/MS m/z	Charge	m/z	Mass	Resolution	Uncalibrated - Calibrated m/z [ppm]	Uncalibrated - Calibrated m/z [Da]	Mass error [ppm]	Mass error [Da]	Uncalibrated mass error [ppm]	Uncalibrated mass error [Da]	Max intensity m/z 0	Retention time	Retention length	Calibrated retention time	Calibrated retention time start	Calibrated retention time finish	Retention time calibration	Match time difference	Match m/z difference	Match q-value	Match score	Number of data points	Number of scans	Number of isotopic peaks	PIF	Fraction of total spectrum	Base peak fraction	PEP	MS/MS count	MS/MS scan number
INTQWLLTSGTTEANAWKSTLVGHDTFTK	29	ClinkerFragment->Lys	_INTQWLLTSGTTEANAWK(cl)STLVGHDTFTK_	INTQWLLTSGTTEANAWK(1)STLVGHDTFTK		INTQWLLTSGTTEANAWK(67.83)STLVGHDTFTK(-67.83)		0	1	0	0	1	sp|P22629|SAV_STRAVStreptavidinOS=StreptomycesavidiniiPE=1SV=1	sp|P22629|SAV_STRAVStreptavidinOS=StreptomycesavidiniiPE=1SV=1	sp|P22629|SAV_STRAVStreptavidinOS=StreptomycesavidiniiPE=1SV=1	MULTI-MSMS	02260_C01_P024108_B00_A00_R1	StrpDtBio50_ClinkerPD	1124.9	3	1124.24	3369.71	37680.9	0	0	0.35964	0.00040432	0.35964	0.00040432	1124.58	56.432	0.40786	56.432	56.237	56.644	0					53	15	5	0	0	0	0.01	2	10936
STLVGHDTFTK	11	Unmodified	_STLVGHDTFTK_					0	0	0	0	0	sp|P22629|SAV_STRAVStreptavidinOS=StreptomycesavidiniiPE=1SV=1	sp|P22629|SAV_STRAVStreptavidinOS=StreptomycesavidiniiPE=1SV=1	sp|P22629|SAV_STRAVStreptavidinOS=StreptomycesavidiniiPE=1SV=1	MULTI-MSMS	02260_C01_P024108_B00_A00_R1	StrpDtBio50_ClinkerPD	603.315	2	603.312	1204.61	55138.5	0	0	3.2638	0.0019691	3.2638	0.0019691	603.313	24.385	0.2693	24.385	24.253	24.522	0					26	14	2	0	0	0	0.01	1	3108
STLVGHDTFTKVKPSAAS	18	Unmodified	_STLVGHDTFTKVKPSAAS_					0	0	0	0	2	sp|P22629|SAV_STRAVStreptavidinOS=StreptomycesavidiniiPE=1SV=1	sp|P22629|SAV_STRAVStreptavidinOS=StreptomycesavidiniiPE=1SV=1	sp|P22629|SAV_STRAVStreptavidinOS=StreptomycesavidiniiPE=1SV=1	MULTI-SECPEP	02260_C01_P024108_B00_A00_R1	StrpDtBio50_ClinkerPD	615.728	3	615.995	1844.96	54444.2	0	0	2.7667	0.0017043	2.7667	0.0017043	615.997	22.403	0.29875	22.403	22.227	22.526	0					30	20	2	0	0	0	0.01	1	2653
YDSAPATDGSGTALGWTVAWKNNYR	25	Unmodified	_YDSAPATDGSGTALGWTVAWKNNYR_					0	0	0	0	1	sp|P22629|SAV_STRAVStreptavidinOS=StreptomycesavidiniiPE=1SV=1	sp|P22629|SAV_STRAVStreptavidinOS=StreptomycesavidiniiPE=1SV=1	sp|P22629|SAV_STRAVStreptavidinOS=StreptomycesavidiniiPE=1SV=1	MULTI-MSMS	02260_C01_P024108_B00_A00_R1	StrpDtBio50_ClinkerPD	901.101	3	901.093	2700.26	43836.2	0	0	1.1746	0.0010585	1.1746	0.0010585	901.428	45.917	0.37598	45.917	45.778	46.154	3.8147e-06					51	24	3	0	0	0	0.01	4	7872
[truncated: 15 more columns]

## Sheet: Strp-DtBio_DtDigest Evidence
Sequence	Length	Modifications	Modified sequence	Dt->Lys Probabilities	Oxidation (M) Probabilities	Dt->Lys Score Diffs	Oxidation (M) Score Diffs	Acetyl (Protein N-term)	Dt->Lys	Dt->N-term	Oxidation (M)	Missed cleavages	Proteins	Leading proteins	Leading razor protein	Type	Raw file	Experiment	MS/MS m/z	Charge	m/z	Mass	Resolution	Uncalibrated - Calibrated m/z [ppm]	Uncalibrated - Calibrated m/z [Da]	Mass error [ppm]	Mass error [Da]	Uncalibrated mass error [ppm]	Uncalibrated mass error [Da]	Max intensity m/z 0	Retention time	Retention length	Calibrated retention time	Calibrated retention time start	Calibrated retention time finish	Retention time calibration	Match time difference	Match m/z difference	Match q-value	Match score	Number of data points	Number of scans	Number of isotopic peaks	PIF	Fraction of total spectrum	Base peak fraction	PEP	MS/MS count	MS/MS scan number
INTQWLLTSGTTEANAWKSTLVGHDTFTK	29	Dt->Lys	_INTQWLLTSGTTEANAWK(dt)STLVGHDTFTK_	INTQWLLTSGTTEANAWK(1)STLVGHDTFTK		INTQWLLTSGTTEANAWK(88.39)STLVGHDTFTK(-88.39)		0	1	0	0	1	sp|P22629|SAV_STRAVStreptavidinOS=StreptomycesavidiniiPE=1SV=1	sp|P22629|SAV_STRAVStreptavidinOS=StreptomycesavidiniiPE=1SV=1	sp|P22629|SAV_STRAVStreptavidinOS=StreptomycesavidiniiPE=1SV=1	MULTI-MSMS	Jonas_Str_B	StrpDtBio50_DtDigestr	1083.55	3	1082.88	3245.61	80284.9	0.070848	7.672e-05	0.0075439	8.1691e-06	0.078392	8.4889e-05	1083.55	19.506	3.297	19.506	18.687	21.984	0					119	28	6	0	0	0	0.01	3	786
INTQWLLTSGTTEANAWKSTLVGHDTFTK	29	Dt->Lys	_INTQWLLTSGTTEANAWK(dt)STLVGHDTFTK_	INTQWLLTSGTTEANAWK(1)STLVGHDTFTK		INTQWLLTSGTTEANAWK(158.67)STLVGHDTFTK(-158.67)		0	1	0	0	1	sp|P22629|SAV_STRAVStreptavidinOS=StreptomycesavidiniiPE=1SV=1	sp|P22629|SAV_STRAVStreptavidinOS=StreptomycesavidiniiPE=1SV=1	sp|P22629|SAV_STRAVStreptavidinOS=StreptomycesavidiniiPE=1SV=1	MULTI-MSMS	Jonas_Str_B	StrpDtBio50_DtDigestr	1083.55	3	1082.88	3245.61	78944	0.071993	7.796e-05	0.2787	0.00030179	0.35069	0.00037975	1083.55	22.726	6.7535	22.726	21.384	28.137	1.9073e-06					143	51	6	0	0	0	0.01	3	945
INTQWLLTSGTTEANAWK	18	Unmodified	_INTQWLLTSGTTEANAWK_					0	0	0	0	0	sp|P22629|SAV_STRAVStreptavidinOS=StreptomycesavidiniiPE=1SV=1	sp|P22629|SAV_STRAVStreptavidinOS=StreptomycesavidiniiPE=1SV=1	sp|P22629|SAV_STRAVStreptavidinOS=StreptomycesavidiniiPE=1SV=1	MULTI-MSMS	Jonas_Str_B	StrpDtBio50_DtDigestr	680.347	3	678.681	2033.02	103564	0.069698	4.7302e-05	-0.56773	-0.00038531	-0.49803	-0.000338	678.681	15.974	2.7836	15.974	15.084	17.867	9.5367e-07					83	19	6	0	0	0	0.01	7	607
INTQWLLTSGTTEANAWK	18	Unmodified	_INTQWLLTSGTTEANAWK_					0	0	0	0	0	sp|P22629|SAV_STRAVStreptavidinOS=StreptomycesavidiniiPE=1SV=1	sp|P22629|SAV_STRAVStreptavidinOS=StreptomycesavidiniiPE=1SV=1	sp|P22629|SAV_STRAVStreptavidinOS=StreptomycesavidiniiPE=1SV=1	MULTI-MSMS	Jonas_Str_B	StrpDtBio50_DtDigestr	1020.02	2	1017.52	2033.02	83659.6	0.069675	7.0895e-05	1.0555	0.001074	1.1252	0.0011449	1018.02	15.976	2.2659	15.976	15.5	17.766	0					101	19	6	0	0	0	0.01	7	609
INTQWLLTSGTTEANAWK	18	Unmodified	_INTQWLLTSGTTEANAWK_					0	0	0	0	0	sp|P22629|SAV_STRAVStreptavidinOS=StreptomycesavidiniiPE=1SV=1	sp|P22629|SAV_STRAVStreptavidinOS=StreptomycesavidiniiPE=1SV=1	sp|P22629|SAV_STRAVStreptavidinOS=StreptomycesavidiniiPE=1SV=1	MULTI-MSMS	Jonas_Str_B	StrpDtBio50_DtDigestr	1018.02	2	1017.52	2033.02	83963.3	0.070926	7.2169e-05	0.45331	0.00046125	0.52424	0.00053342	1018.02	19.528	8.0875	19.528	17.766	25.853	0					327	68	6	0	0	0	0.01	25	719
INTQWLLTSGTTEANAWK	18	Unmodified	_INTQWLLTSGTTEANAWK_					0	0	0	0	0	sp|P22629|SAV_STRAVStreptavidinOS=StreptomycesavidiniiPE=1SV=1	sp|P22629|SAV_STRAVStreptavidinOS=StreptomycesavidiniiPE=1SV=1	sp|P22629|SAV_STRAVStreptavidinOS=StreptomycesavidiniiPE=1SV=1	MULTI-MSMS	Jonas_Str_B	StrpDtBio50_DtDigestr	679.016	3	678.681	2033.02	103432	0.070931	4.814e-05	-0.67936	-0.00046107	-0.60843	-0.00041293	679.015	19.419	8.5495	19.419	17.304	25.853	0					288	72	6	0	0	0	0.01	25	720
INTQWLLTSGTTEANAWK	18	Unmodified	_INTQWLLTSGTTEANAWK_					0	0	0	0	0	sp|P22629|SAV_STRAVStreptavidinOS=StreptomycesavidiniiPE=1SV=1	sp|P22629|SAV_STRAVStreptavidinOS=StreptomycesavidiniiPE=1SV=1	sp|P22629|SAV_STRAVStreptavidinOS=StreptomycesavidiniiPE=1SV=1	MULTI-MSMS	Jonas_Str_B	StrpDtBio50_DtDigestr	1018.02	2	1017.52	2033.02	83925.8	0.073195	7.4477e-05	0.41065	0.00041784	0.48384	0.00049232	1017.52	27.109	1.7115	27.109	25.724	27.435	-1.9073e-06					53	12	5	0	0	0	0.01	6	1083
INTQWLLTSGTTEANAWK	18	Unmodified	_INTQWLLTSGTTEANAWK_					0	0	0	0	0	sp|P22629|SAV_STRAVStreptavidinOS=StreptomycesavidiniiPE=1SV=1	sp|P22629|SAV_STRAVStreptavidinOS=StreptomycesavidiniiPE=1SV=1	sp|P22629|SAV_STRAVStreptavidinOS=StreptomycesavidiniiPE=1SV=1	MULTI-MSMS	Jonas_Str_B	StrpDtBio50_DtDigestr	679.015	3	678.681	2033.02	103800	0.073178	4.9664e-05	-0.50618	-0.00034354	-0.433	-0.00029387	678.681	27.12	1.7115	27.12	25.724	27.435	0					31	12	3	0	0	0	0.01	5	1085
INTQWLLTSGTTEANAWK	18	Unmodified	_INTQWLLTSGTTEANAWK_					0	0	0	0	0	sp|P22629|SAV_STRAVStreptavidinOS=StreptomycesavidiniiPE=1SV=1	sp|P22629|SAV_STRAVStreptavidinOS=StreptomycesavidiniiPE=1SV=1	sp|P22629|SAV_STRAVStreptavidinOS=StreptomycesavidiniiPE=1SV=1	MULTI-MSMS	Jonas_Str_B	StrpDtBio50_DtDigestr	678.682	3	678.681	2033.02	104061	0.073921	5.0169e-05	-0.36688	-0.00024899	-0.29296	-0.00019882	679.015	27.65	5.0944	27.65	27.2	32.294	0					92	45	4	0	0	0	0.01	14	1147
INTQWLLTSGTTEANAWK	18	Unmodified	_INTQWLLTSGTTEANAWK_					0	0	0	0	0	sp|P22629|SAV_STRAVStreptavidinOS=StreptomycesavidiniiPE=1SV=1	sp|P22629|SAV_STRAVStreptavidinOS=StreptomycesavidiniiPE=1SV=1	sp|P22629|SAV_STRAVStreptavidinOS=StreptomycesavidiniiPE=1SV=1	MULTI-MSMS	Jonas_Str_B	StrpDtBio50_DtDigestr	1018.02	2	1017.52	2033.02	83963.3	0.074117	7.5416e-05	0.67143	0.00068319	0.74554	0.0007586	1018.02	27.615	5.5663	27.615	27.354	32.92	0					144	58	4	0	0	0	0.01	18	1155
INTQWLLTSGTTEANAWK	18	Unmodified	_INTQWLLTSGTTEANAWK_					0	0	0	0	0	sp|P22629|SAV_STRAVStreptavidinOS=StreptomycesavidiniiPE=1SV=1	sp|P22629|SAV_STRAVStreptavidinOS=StreptomycesavidiniiPE=1SV=1	sp|P22629|SAV_STRAVStreptavidinOS=StreptomycesavidiniiPE=1SV=1	MULTI-MSMS	Jonas_Str_B	StrpDtBio50_DtDigestr	679.015	3	678.681	2033.02	94599.3	0.075156	5.1007e-05	-0.55002	-0.00037329	-0.47487	-0.00032228	679.015	32.716	0.45721	32.716	32.533	32.99	-3.8147e-06					16	10	2	0	0	0	0.01	1	1335
INTQWLLTSGTTEANAWK	18	Unmodified	_INTQWLLTSGTTEANAWK_					0	0	0	0	0	sp|P22629|SAV_STRAVStreptavidinOS=StreptomycesavidiniiPE=1SV=1	sp|P22629|SAV_STRAVStreptavidinOS=StreptomycesavidiniiPE=1SV=1	sp|P22629|SAV_STRAVStreptavidinOS=StreptomycesavidiniiPE=1SV=1	MSMS	Jonas_Str_B	StrpDtBio50_DtDigestr	678.681	3	678.681	2033.02	NaN	NaN	NaN	NaN	NaN	NaN	NaN	NaN	30.855	1	30.855	30.355	31.355	0								0	0	0	0.01	1	1276
INTQWLLTSGTTEANAWK	18	Unmodified	_INTQWLLTSGTTEANAWK_					0	0	0	0	0	sp|P22629|SAV_STRAVStreptavidinOS=StreptomycesavidiniiPE=1SV=1	sp|P22629|SAV_STRAVStreptavidinOS=StreptomycesavidiniiPE=1SV=1	sp|P22629|SAV_STRAVStreptavidinOS=StreptomycesavidiniiPE=1SV=1	MSMS	Jonas_Str_B	StrpDtBio50_DtDigestr	678.682	3	678.681	2033.02	NaN	NaN	NaN	NaN	NaN	NaN	NaN	NaN	31.113	1	31.113	30.613	31.613	1.9073e-06								0	0	0	0.01	1	1286
INTQWLLTSGTTEANAWK	18	Unmodified	_INTQWLLTSGTTEANAWK_					0	0	0	0	0	sp|P22629|SAV_STRAVStreptavidinOS=StreptomycesavidiniiPE=1SV=1	sp|P22629|SAV_STRAVStreptavidinOS=StreptomycesavidiniiPE=1SV=1	sp|P22629|SAV_STRAVStreptavidinOS=StreptomycesavidiniiPE=1SV=1	MSMS	Jonas_Str_B	StrpDtBio50_DtDigestr	678.677	3	678.681	2033.02	NaN	NaN	NaN	NaN	NaN	NaN	NaN	NaN	32.231	1	32.231	31.731	32.731	0								0	0	0	0.01	1	1324
NAHSATTWSGQYVGGAEAR	19	Unmodified	_NAHSATTWSGQYVGGAEAR_					0	0	0	0	0	sp|P22629|SAV_STRAVStreptavidinOS=StreptomycesavidiniiPE=1SV=1	sp|P22629|SAV_STRAVStreptavidinOS=StreptomycesavidiniiPE=1SV=1	sp|P22629|SAV_STRAVStreptavidinOS=StreptomycesavidiniiPE=1SV=1	MULTI-MSMS	Jonas_Str_B	StrpDtBio50_DtDigestr	655.306	3	654.973	1961.9	105400	0.064613	4.232e-05	0.16569	0.00010852	0.2303	0.00015084	655.308	1.1515	1.0299	1.1515	0.5676	1.5975	0					48	23	3	0	0	0	0.01	3	30
NAHSATTWSGQYVGGAEAR	19	Unmodified	_NAHSATTWSGQYVGGAEAR_					0	0	0	0	0	sp|P22629|SAV_STRAVStreptavidinOS=StreptomycesavidiniiPE=1SV=1	sp|P22629|SAV_STRAVStreptavidinOS=StreptomycesavidiniiPE=1SV=1	sp|P22629|SAV_STRAVStreptavidinOS=StreptomycesavidiniiPE=1SV=1	MULTI-MSMS	Jonas_Str_B	StrpDtBio50_DtDigestr	654.972	3	654.973	1961.9	106199	0.065221	4.2718e-05	0.15042	9.8519e-05	0.21564	0.00014124	654.973	3.0736	0.62287	3.0736	2.7518	3.3747	0					20	13	2	0	0	0	0.01	2	94
NAHSATTWSGQYVGGAEAR	19	Unmodified	_NAHSATTWSGQYVGGAEAR_					0	0	0	0	0	sp|P22629|SAV_STRAVStreptavidinOS=StreptomycesavidiniiPE=1SV=1	sp|P22629|SAV_STRAVStreptavidinOS=StreptomycesavidiniiPE=1SV=1	sp|P22629|SAV_STRAVStreptavidinOS=StreptomycesavidiniiPE=1SV=1	MULTI-MSMS	Jonas_Str_B	StrpDtBio50_DtDigestr	655.308	3	654.973	1961.9	106199	0.065446	4.2866e-05	-0.47804	-0.0003131	-0.41259	-0.00027024	655.307	3.6619	0.78402	3.6619	3.3403	4.1243	0					31	18	2	0	0	0	0.01	1	124
NAHSATTWSGQYVGGAEAR	19	Unmodified	_NAHSATTWSGQYVGGAEAR_					0	0	0	0	0	sp|P22629|SAV_STRAVStreptavidinOS=StreptomycesavidiniiPE=1SV=1	sp|P22629|SAV_STRAVStreptavidinOS=StreptomycesavidiniiPE=1SV=1	sp|P22629|SAV_STRAVStreptavidinOS=StreptomycesavidiniiPE=1SV=1	MULTI-MSMS	Jonas_Str_B	StrpDtBio50_DtDigestr	655.309	3	654.973	1961.9	105440	0.066133	4.3315e-05	0.29923	0.00019599	0.36537	0.00023931	655.308	5.6136	0.70073	5.6136	5.4058	6.1066	0					29	16	3	0	0	0	0.01	1	181
NAHSATTWSGQYVGGAEAR	19	Unmodified	_NAHSATTWSGQYVGGAEAR_					0	0	0	0	0	sp|P22629|SAV_STRAVStreptavidinOS=StreptomycesavidiniiPE=1SV=1	sp|P22629|SAV_STRAVStreptavidinOS=StreptomycesavidiniiPE=1SV=1	sp|P22629|SAV_STRAVStreptavidinOS=StreptomycesavidiniiPE=1SV=1	MULTI-MSMS	Jonas_Str_B	StrpDtBio50_DtDigestr	655.306	3	654.973	1961.9	101780	0.066382	4.3479e-05	-0.712	-0.00046634	-0.64562	-0.00042287	654.973	6.6856	1.0524	6.6856	6.0258	7.0782	0					38	25	3	0	0	0	0.01	1	199
NAHSATTWSGQYVGGAEAR	19	Unmodified	_NAHSATTWSGQYVGGAEAR_					0	0	0	0	0	sp|P22629|SAV_STRAVStreptavidinOS=StreptomycesavidiniiPE=1SV=1	sp|P22629|SAV_STRAVStreptavidinOS=StreptomycesavidiniiPE=1SV=1	sp|P22629|SAV_STRAVStreptavidinOS=StreptomycesavidiniiPE=1SV=1	MULTI-MSMS	Jonas_Str_B	StrpDtBio50_DtDigestr	655.306	3	654.973	1961.9	104893	0.067322	4.4094e-05	-0.54278	-0.00035551	-0.47546	-0.00031141	654.973	9.5986	1.4929	9.5986	8.6116	10.104	0					29	23	2	0	0	0	0.01	1	311
NAHSATTWSGQYVGGAEAR	19	Unmodified	_NAHSATTWSGQYVGGAEAR_					0	0	0	0	0	sp|P22629|SAV_STRAVStreptavidinOS=StreptomycesavidiniiPE=1SV=1	sp|P22629|SAV_STRAVStreptavidinOS=StreptomycesavidiniiPE=1SV=1	sp|P22629|SAV_STRAVStreptavidinOS=StreptomycesavidiniiPE=1SV=1	MULTI-MSMS	Jonas_Str_B	StrpDtBio50_DtDigestr	656.639	3	654.973	1961.9	105530	0.068662	4.4972e-05	-0.7169	-0.00046955	-0.64824	-0.00042458	654.973	12.372	4.2536	12.372	11.894	16.147	0					152	37	6	0	0	0	0.01	12	415
NAHSATTWSGQYVGGAEAR	19	Unmodified	_NAHSATTWSGQYVGGAEAR_					0	0	0	0	0	sp|P22629|SAV_STRAVStreptavidinOS=StreptomycesavidiniiPE=1SV=1	sp|P22629|SAV_STRAVStreptavidinOS=StreptomycesavidiniiPE=1SV=1	sp|P22629|SAV_STRAVStreptavidinOS=StreptomycesavidiniiPE=1SV=1	MULTI-MSMS	Jonas_Str_B	StrpDtBio50_DtDigestr	982.459	2	981.956	1961.9	84782.6	0.068474	6.7238e-05	0.1002	9.839e-05	0.16867	0.00016563	982.458	12.365	3.3811	12.365	12.119	15.5	0					127	29	7	0	0	0	0.01	9	424
NAHSATTWSGQYVGGAEAR	19	Unmodified	_NAHSATTWSGQYVGGAEAR_					0	0	0	0	0	sp|P22629|SAV_STRAVStreptavidinOS=StreptomycesavidiniiPE=1SV=1	sp|P22629|SAV_STRAVStreptavidinOS=StreptomycesavidiniiPE=1SV=1	sp|P22629|SAV_STRAVStreptavidinOS=StreptomycesavidiniiPE=1SV=1	MULTI-MSMS	Jonas_Str_B	StrpDtBio50_DtDigestr	981.956	2	981.956	1961.9	85315.1	0.069928	6.8666e-05	0.093907	9.2213e-05	0.16384	0.00016088	981.956	17.789	4.896	17.789	15.428	20.324	0					130	46	5	0	0	0	0.01	9	587
NAHSATTWSGQYVGGAEAR	19	Unmodified	_NAHSATTWSGQYVGGAEAR_					0	0	0	0	0	sp|P22629|SAV_STRAVStreptavidinOS=StreptomycesavidiniiPE=1SV=1	sp|P22629|SAV_STRAVStreptavidinOS=StreptomycesavidiniiPE=1SV=1	sp|P22629|SAV_STRAVStreptavidinOS=StreptomycesavidiniiPE=1SV=1	MULTI-MSMS	Jonas_Str_B	StrpDtBio50_DtDigestr	981.956	2	981.956	1961.9	85465.9	0.071259	6.9974e-05	0.47908	0.00047044	0.55034	0.00054041	982.458	21.021	2.6071	21.021	19.377	21.984	0					60	22	4	0	0	0	0.01	4	844
NAHSATTWSGQYVGGAEAR	19	Unmodified	_NAHSATTWSGQYVGGAEAR_					0	0	0	0	0	sp|P22629|SAV_STRAVStreptavidinOS=StreptomycesavidiniiPE=1SV=1	sp|P22629|SAV_STRAVStreptavidinOS=StreptomycesavidiniiPE=1SV=1	sp|P22629|SAV_STRAVStreptavidinOS=StreptomycesavidiniiPE=1SV=1	MULTI-MSMS	Jonas_Str_B	StrpDtBio50_DtDigestr	982.459	2	981.956	1961.9	85276.1	0.071957	7.0659e-05	0.41708	0.00040956	0.48904	0.00048022	982.458	22.371	3.8457	22.371	21.878	25.724	0					103	29	4	0	0	0	0.01	10	914
NAHSATTWSGQYVGGAEAR	19	Unmodified	_NAHSATTWSGQYVGGAEAR_					0	0	0	0	0	sp|P22629|SAV_STRAVStreptavidinOS=StreptomycesavidiniiPE=1SV=1	sp|P22629|SAV_STRAVStreptavidinOS=StreptomycesavidiniiPE=1SV=1	sp|P22629|SAV_STRAVStreptavidinOS=StreptomycesavidiniiPE=1SV=1	MULTI-MSMS	Jonas_Str_B	StrpDtBio50_DtDigestr	982.457	2	981.956	1961.9	85465.9	0.073232	7.1911e-05	0.61964	0.00060846	0.69287	0.00068037	981.957	26.707	2.4134	26.707	25.724	28.137	-1.9073e-06					34	17	2	0	0	0	0.01	3	1095
NAHSATTWSGQYVGGAEAR	19	Unmodified	_NAHSATTWSGQYVGGAEAR_					0	0	0	0	0	sp|P22629|SAV_STRAVStreptavidinOS=StreptomycesavidiniiPE=1SV=1	sp|P22629|SAV_STRAVStreptavidinOS=StreptomycesavidiniiPE=1SV=1	sp|P22629|SAV_STRAVStreptavidinOS=StreptomycesavidiniiPE=1SV=1	MULTI-MSMS	Jonas_Str_B	StrpDtBio50_DtDigestr	982.457	2	981.956	1961.9	83752.9	0.074061	7.2725e-05	0.61502	0.00060392	0.68908	0.00067664	981.956	29.029	3.5894	29.029	27.995	31.584	-1.9073e-06					54	28	4	0	0	0	0.01	3	1190
NAHSATTWSGQYVGGAEAR	19	Unmodified	_NAHSATTWSGQYVGGAEAR_					0	0	0	0	0	sp|P22629|SAV_STRAVStreptavidinOS=StreptomycesavidiniiPE=1SV=1	sp|P22629|SAV_STRAVStreptavidinOS=StreptomycesavidiniiPE=1SV=1	sp|P22629|SAV_STRAVStreptavidinOS=StreptomycesavidiniiPE=1SV=1	MSMS	Jonas_Str_B	StrpDtBio50_DtDigestr	655.307	3	654.973	1961.9	NaN	NaN	NaN	NaN	NaN	NaN	NaN	NaN	0.5037	1	0.5037	0.0037017	1.0037	0								0	0	0	0.01	1	18
NAHSATTWSGQYVGGAEAR	19	Unmodified	_NAHSATTWSGQYVGGAEAR_					0	0	0	0	0	sp|P22629|SAV_STRAVStreptavidinOS=StreptomycesavidiniiPE=1SV=1	sp|P22629|SAV_STRAVStreptavidinOS=StreptomycesavidiniiPE=1SV=1	sp|P22629|SAV_STRAVStreptavidinOS=StreptomycesavidiniiPE=1SV=1	MSMS	Jonas_Str_B	StrpDtBio50_DtDigestr	654.972	3	654.973	1961.9	NaN	NaN	NaN	NaN	NaN	NaN	NaN	NaN	1.902	1	1.902	1.402	2.402	0								0	0	0	0.01	1	63
NAHSATTWSGQYVGGAEAR	19	Unmodified	_NAHSATTWSGQYVGGAEAR_					0	0	0	0	0	sp|P22629|SAV_STRAVStreptavidinOS=StreptomycesavidiniiPE=1SV=1	sp|P22629|SAV_STRAVStreptavidinOS=StreptomycesavidiniiPE=1SV=1	sp|P22629|SAV_STRAVStreptavidinOS=StreptomycesavidiniiPE=1SV=1	MSMS	Jonas_Str_B	StrpDtBio50_DtDigestr	654.972	3	654.973	1961.9	NaN	NaN	NaN	NaN	NaN	NaN	NaN	NaN	2.5131	1	2.5131	2.0131	3.0131	0								0	0	0	0.01	1	82
NAHSATTWSGQYVGGAEAR	19	Unmodified	_NAHSATTWSGQYVGGAEAR_					0	0	0	0	0	sp|P22629|SAV_STRAVStreptavidinOS=StreptomycesavidiniiPE=1SV=1	sp|P22629|SAV_STRAVStreptavidinOS=StreptomycesavidiniiPE=1SV=1	sp|P22629|SAV_STRAVStreptavidinOS=StreptomycesavidiniiPE=1SV=1	MSMS	Jonas_Str_B	StrpDtBio50_DtDigestr	981.957	2	981.956	1961.9	NaN	NaN	NaN	NaN	NaN	NaN	NaN	NaN	18.668	1	18.668	18.168	19.168	0								0	0	0	0.01	1	754
NAHSATTWSGQYVGGAEAR	19	Unmodified	_NAHSATTWSGQYVGGAEAR_					0	0	0	0	0	sp|P22629|SAV_STRAVStreptavidinOS=StreptomycesavidiniiPE=1SV=1	sp|P22629|SAV_STRAVStreptavidinOS=StreptomycesavidiniiPE=1SV=1	sp|P22629|SAV_STRAVStreptavidinOS=StreptomycesavidiniiPE=1SV=1	MSMS	Jonas_Str_B	StrpDtBio50_DtDigestr	981.957	2	981.956	1961.9	NaN	NaN	NaN	NaN	NaN	NaN	NaN	NaN	19.19	1	19.19	18.69	19.69	0								0	0	0	0.01	1	779
NAHSATTWSGQYVGGAEAR	19	Unmodified	_NAHSATTWSGQYVGGAEAR_					0	0	0	0	0	sp|P22629|SAV_STRAVStreptavidinOS=StreptomycesavidiniiPE=1SV=1	sp|P22629|SAV_STRAVStreptavidinOS=StreptomycesavidiniiPE=1SV=1	sp|P22629|SAV_STRAVStreptavidinOS=StreptomycesavidiniiPE=1SV=1	MSMS	Jonas_Str_B	StrpDtBio50_DtDigestr	981.958	2	981.956	1961.9	NaN	NaN	NaN	NaN	NaN	NaN	NaN	NaN	19.508	1	19.508	19.008	20.008	0								0	0	0	0.01	1	796
NAHSATTWSGQYVGGAEAR	19	Unmodified	_NAHSATTWSGQYVGGAEAR_					0	0	0	0	0	sp|P22629|SAV_STRAVStreptavidinOS=StreptomycesavidiniiPE=1SV=1	sp|P22629|SAV_STRAVStreptavidinOS=StreptomycesavidiniiPE=1SV=1	sp|P22629|SAV_STRAVStreptavidinOS=StreptomycesavidiniiPE=1SV=1	MSMS	Jonas_Str_B	StrpDtBio50_DtDigestr	981.957	2	981.956	1961.9	NaN	NaN	NaN	NaN	NaN	NaN	NaN	NaN	19.782	1	19.782	19.282	20.282	0								0	0	0	0.01	1	811
NNYRNAHSATTWSGQYVGGAEAR	23	Unmodified	_NNYRNAHSATTWSGQYVGGAEAR_					0	0	0	0	1	sp|P22629|SAV_STRAVStreptavidinOS=StreptomycesavidiniiPE=1SV=1	sp|P22629|SAV_STRAVStreptavidinOS=StreptomycesavidiniiPE=1SV=1	sp|P22629|SAV_STRAVStreptavidinOS=StreptomycesavidiniiPE=1SV=1	MULTI-SECPEP	Jonas_Str_B	StrpDtBio50_DtDigestr	628.323	4	628.294	2509.15	109592	0.068814	4.3235e-05	-0.58241	-0.00036593	-0.5136	-0.00032269	628.545	13.588	3.0723	13.588	12.427	15.5	0					67	26	5	0	0	0	0.01	1	559
STLVGHDTFTK	11	Unmodified	_STLVGHDTFTK_					0	0	0	0	0	sp|P22629|SAV_STRAVStreptavidinOS=StreptomycesavidiniiPE=1SV=1	sp|P22629|SAV_STRAVStreptavidinOS=StreptomycesavidiniiPE=1SV=1	sp|P22629|SAV_STRAVStreptavidinOS=StreptomycesavidiniiPE=1SV=1	MULTI-MSMS	Jonas_Str_B	StrpDtBio50_DtDigestr	402.544	3	402.544	1204.61	143275	0.064606	2.6007e-05	0.60519	0.00024361	0.66979	0.00026962	402.544	1.397	0.98392	1.397	0.6136	1.5975	0					32	22	2	0	0	0	0.01	3	32
STLVGHDTFTK	11	Unmodified	_STLVGHDTFTK_					0	0	0	0	0	sp|P22629|SAV_STRAVStreptavidinOS=StreptomycesavidiniiPE=1SV=1	sp|P22629|SAV_STRAVStreptavidinOS=StreptomycesavidiniiPE=1SV=1	sp|P22629|SAV_STRAVStreptavidinOS=StreptomycesavidiniiPE=1SV=1	MULTI-MSMS	Jonas_Str_B	StrpDtBio50_DtDigestr	603.311	2	603.312	1204.61	114749	0.064952	3.9186e-05	0.65628	0.00039594	0.72124	0.00043513	603.814	2.3946	1.3701	2.3946	1.6426	3.0127	0					39	31	2	0	0	0	0.01	2	68
STLVGHDTFTK	11	Unmodified	_STLVGHDTFTK_					0	0	0	0	0	sp|P22629|SAV_STRAVStreptavidinOS=StreptomycesavidiniiPE=1SV=1	sp|P22629|SAV_STRAVStreptavidinOS=StreptomycesavidiniiPE=1SV=1	sp|P22629|SAV_STRAVStreptavidinOS=StreptomycesavidiniiPE=1SV=1	MULTI-MSMS	Jonas_Str_B	StrpDtBio50_DtDigestr	603.312	2	603.312	1204.61	111406	0.065432	3.9476e-05	0.23101	0.00013937	0.29645	0.00017885	603.312	3.7436	1.0936	3.7436	3.0677	4.1612	0					40	25	2	0	0	0	0.01	2	115
STLVGHDTFTK	11	Unmodified	_STLVGHDTFTK_					0	0	0	0	0	sp|P22629|SAV_STRAVStreptavidinOS=StreptomycesavidiniiPE=1SV=1	sp|P22629|SAV_STRAVStreptavidinOS=StreptomycesavidiniiPE=1SV=1	sp|P22629|SAV_STRAVStreptavidinOS=StreptomycesavidiniiPE=1SV=1	MULTI-MSMS	Jonas_Str_B	StrpDtBio50_DtDigestr	402.544	3	402.544	1204.61	138541	0.065852	2.6508e-05	0.58464	0.00023534	0.6505	0.00026185	402.544	5.0276	0.72546	5.0276	4.4885	5.2139	0					24	16	2	0	0	0	0.01	2	157
STLVGHDTFTK	11	Unmodified	_STLVGHDTFTK_					0	0	0	0	0	sp|P22629|SAV_STRAVStreptavidinOS=StreptomycesavidiniiPE=1SV=1	sp|P22629|SAV_STRAVStreptavidinOS=StreptomycesavidiniiPE=1SV=1	sp|P22629|SAV_STRAVStreptavidinOS=StreptomycesavidiniiPE=1SV=1	MULTI-MSMS	Jonas_Str_B	StrpDtBio50_DtDigestr	402.543	3	402.544	1204.61	132020	0.066017	2.6575e-05	0.61032	0.00024568	0.67633	0.00027225	402.544	5.334	0.32824	5.334	5.2139	5.5422	0					15	7	3	0	0	0	0.01	1	173
STLVGHDTFTK	11	Unmodified	_STLVGHDTFTK_					0	0	0	0	0	sp|P22629|SAV_STRAVStreptavidinOS=StreptomycesavidiniiPE=1SV=1	sp|P22629|SAV_STRAVStreptavidinOS=StreptomycesavidiniiPE=1SV=1	sp|P22629|SAV_STRAVStreptavidinOS=StreptomycesavidiniiPE=1SV=1	MULTI-MSMS	Jonas_Str_B	StrpDtBio50_DtDigestr	603.312	2	603.312	1204.61	105640	0.066136	3.99e-05	-0.21707	-0.00013096	-0.15093	-9.106e-05	603.312	6.0081	1.3403	6.0081	4.9909	6.3312	4.7684e-07					48	31	2	0	0	0	0.01	3	176
STLVGHDTFTK	11	Unmodified	_STLVGHDTFTK_					0	0	0	0	0	sp|P22629|SAV_STRAVStreptavidinOS=StreptomycesavidiniiPE=1SV=1	sp|P22629|SAV_STRAVStreptavidinOS=StreptomycesavidiniiPE=1SV=1	sp|P22629|SAV_STRAVStreptavidinOS=StreptomycesavidiniiPE=1SV=1	MULTI-MSMS	Jonas_Str_B	StrpDtBio50_DtDigestr	402.544	3	402.544	1204.61	134956	0.066301	2.6689e-05	0.15675	6.3098e-05	0.22305	8.9787e-05	402.544	6.2157	0.45298	6.2157	6.0258	6.4788	-4.7684e-07					13	10	2	0	0	0	0.01	1	203
STLVGHDTFTK	11	Unmodified	_STLVGHDTFTK_					0	0	0	0	0	sp|P22629|SAV_STRAVStreptavidinOS=StreptomycesavidiniiPE=1SV=1	sp|P22629|SAV_STRAVStreptavidinOS=StreptomycesavidiniiPE=1SV=1	sp|P22629|SAV_STRAVStreptavidinOS=StreptomycesavidiniiPE=1SV=1	MULTI-MSMS	Jonas_Str_B	StrpDtBio50_DtDigestr	603.312	2	603.312	1204.61	111663	0.066397	4.0058e-05	0.94343	0.00056918	1.0098	0.00060924	603.312	6.626	0.62891	6.626	6.2049	6.8338	0					23	15	2	0	0	0	0.01	1	213
STLVGHDTFTK	11	Unmodified	_STLVGHDTFTK_					0	0	0	0	0	sp|P22629|SAV_STRAVStreptavidinOS=StreptomycesavidiniiPE=1SV=1	sp|P22629|SAV_STRAVStreptavidinOS=StreptomycesavidiniiPE=1SV=1	sp|P22629|SAV_STRAVStreptavidinOS=StreptomycesavidiniiPE=1SV=1	MULTI-MSMS	Jonas_Str_B	StrpDtBio50_DtDigestr	402.541	3	402.544	1204.61	139263	0.06674	2.6866e-05	0.87769	0.00035331	0.94443	0.00038017	402.544	7.5764	0.30969	7.5764	7.4328	7.7425	0					8	7	2	0	0	0	0.01	1	242
STLVGHDTFTK	11	Unmodified	_STLVGHDTFTK_					0	0	0	0	0	sp|P22629|SAV_STRAVStreptavidinOS=StreptomycesavidiniiPE=1SV=1	sp|P22629|SAV_STRAVStreptavidinOS=StreptomycesavidiniiPE=1SV=1	sp|P22629|SAV_STRAVStreptavidinOS=StreptomycesavidiniiPE=1SV=1	MULTI-MSMS	Jonas_Str_B	StrpDtBio50_DtDigestr	402.544	3	402.544	1204.61	146331	0.067808	2.7296e-05	0.27065	0.00010895	0.33845	0.00013624	402.543	10.784	0.98791	10.784	10.263	11.25	0					10	7	2	0	0	0	0.01	1	352
STLVGHDTFTK	11	Unmodified	_STLVGHDTFTK_					0	0	0	0	0	sp|P22629|SAV_STRAVStreptavidinOS=StreptomycesavidiniiPE=1SV=1	sp|P22629|SAV_STRAVStreptavidinOS=StreptomycesavidiniiPE=1SV=1	sp|P22629|SAV_STRAVStreptavidinOS=StreptomycesavidiniiPE=1SV=1	MULTI-MSMS	Jonas_Str_B	StrpDtBio50_DtDigestr	603.311	2	603.312	1204.61	109213	0.068195	4.1143e-05	0.77449	0.00046726	0.84269	0.0005084	603.312	11.655	3.0052	11.655	11.339	14.344	0					107	27	5	0	0	0	0.01	7	378
STLVGHDTFTK	11	Unmodified	_STLVGHDTFTK_					0	0	0	0	0	sp|P22629|SAV_STRAVStreptavidinOS=StreptomycesavidiniiPE=1SV=1	sp|P22629|SAV_STRAVStreptavidinOS=StreptomycesavidiniiPE=1SV=1	sp|P22629|SAV_STRAVStreptavidinOS=StreptomycesavidiniiPE=1SV=1	MULTI-MSMS	Jonas_Str_B	StrpDtBio50_DtDigestr	402.543	3	402.544	1204.61	135450	0.068216	2.746e-05	0.94487	0.00038035	1.0131	0.00040781	402.544	11.678	3.0052	11.678	11.339	14.344	0					89	27	6	0	0	0	0.01	9	379
STLVGHDTFTK	11	Unmodified	_STLVGHDTFTK_					0	0	0	0	0	sp|P22629|SAV_STRAVStreptavidinOS=StreptomycesavidiniiPE=1SV=1	sp|P22629|SAV_STRAVStreptavidinOS=StreptomycesavidiniiPE=1SV=1	sp|P22629|SAV_STRAVStreptavidinOS=StreptomycesavidiniiPE=1SV=1	MULTI-MSMS	Jonas_Str_B	StrpDtBio50_DtDigestr	402.543	3	402.544	1204.61	135127	0.069325	2.7906e-05	-0.80642	-0.00032462	-0.73709	-0.00029671	402.543	15.758	3.0952	15.758	13.052	16.147	0					60	26	3	0	0	0	0.01	5	534
STLVGHDTFTK	11	Unmodified	_STLVGHDTFTK_					0	0	0	0	0	sp|P22629|SAV_STRAVStreptavidinOS=StreptomycesavidiniiPE=1SV=1	sp|P22629|SAV_STRAVStreptavidinOS=StreptomycesavidiniiPE=1SV=1	sp|P22629|SAV_STRAVStreptavidinOS=StreptomycesavidiniiPE=1SV=1	MULTI-MSMS	Jonas_Str_B	StrpDtBio50_DtDigestr	402.543	3	402.544	1204.61	135788	0.070078	2.8209e-05	-0.49825	-0.00020057	-0.42817	-0.00017236	402.543	16.511	4.1766	16.511	16.147	20.324	0					105	39	4	0	0	0	0.01	14	622
STLVGHDTFTK	11	Unmodified	_STLVGHDTFTK_					0	0	0	0	0	sp|P22629|SAV_STRAVStreptavidinOS=StreptomycesavidiniiPE=1SV=1	sp|P22629|SAV_STRAVStreptavidinOS=StreptomycesavidiniiPE=1SV=1	sp|P22629|SAV_STRAVStreptavidinOS=StreptomycesavidiniiPE=1SV=1	MULTI-MSMS	Jonas_Str_B	StrpDtBio50_DtDigestr	402.544	3	402.544	1204.61	134337	0.071505	2.8784e-05	0.52086	0.00020967	0.59237	0.00023845	402.544	20.786	5.5289	20.786	20.195	25.724	0					69	43	3	0	0	0	0.01	15	853
STLVGHDTFTK	11	Unmodified	_STLVGHDTFTK_					0	0	0	0	0	sp|P22629|SAV_STRAVStreptavidinOS=StreptomycesavidiniiPE=1SV=1	sp|P22629|SAV_STRAVStreptavidinOS=StreptomycesavidiniiPE=1SV=1	sp|P22629|SAV_STRAVStreptavidinOS=StreptomycesavidiniiPE=1SV=1	MULTI-MSMS	Jonas_Str_B	StrpDtBio50_DtDigestr	402.544	3	402.544	1204.61	135127	0.073867	2.9735e-05	0.12798	5.1519e-05	0.20185	8.1253e-05	402.544	28.956	5.8603	28.956	25.724	31.584	0					80	45	4	0	0	0	0.01	18	1078
STLVGHDTFTK	11	Unmodified	_STLVGHDTFTK_					0	0	0	0	0	sp|P22629|SAV_STRAVStreptavidinOS=StreptomycesavidiniiPE=1SV=1	sp|P22629|SAV_STRAVStreptavidinOS=StreptomycesavidiniiPE=1SV=1	sp|P22629|SAV_STRAVStreptavidinOS=StreptomycesavidiniiPE=1SV=1	MULTI-MSMS	Jonas_Str_B	StrpDtBio50_DtDigestr	603.311	2	603.312	1204.61	109311	0.07317	4.4144e-05	-0.13373	-8.0684e-05	-0.060565	-3.6539e-05	603.311	26.854	1.7115	26.854	25.724	27.435	1.9073e-06					31	12	3	0	0	0	0.01	4	1088
STLVGHDTFTK	11	Unmodified	_STLVGHDTFTK_					0	0	0	0	0	sp|P22629|SAV_STRAVStreptavidinOS=StreptomycesavidiniiPE=1SV=1	sp|P22629|SAV_STRAVStreptavidinOS=StreptomycesavidiniiPE=1SV=1	sp|P22629|SAV_STRAVStreptavidinOS=StreptomycesavidiniiPE=1SV=1	MULTI-MSMS	Jonas_Str_B	StrpDtBio50_DtDigestr	603.311	2	603.312	1204.61	109311	0.073805	4.4527e-05	-0.37663	-0.00022723	-0.30283	-0.0001827	603.311	28.643	3.112	28.643	27.354	30.466	0					38	23	3	0	0	0	0.01	6	1148
STLVGHDTFTK	11	Unmodified	_STLVGHDTFTK_					0	0	0	0	0	sp|P22629|SAV_STRAVStreptavidinOS=StreptomycesavidiniiPE=1SV=1	sp|P22629|SAV_STRAVStreptavidinOS=StreptomycesavidiniiPE=1SV=1	sp|P22629|SAV_STRAVStreptavidinOS=StreptomycesavidiniiPE=1SV=1	MSMS	Jonas_Str_B	StrpDtBio50_DtDigestr	603.312	2	603.312	1204.61	NaN	NaN	NaN	NaN	NaN	NaN	NaN	NaN	0.073338	1	0.073338	-0.42666	0.57334	0								0	0	0	0.01	1	4
STLVGHDTFTK	11	Unmodified	_STLVGHDTFTK_					0	0	0	0	0	sp|P22629|SAV_STRAVStreptavidinOS=StreptomycesavidiniiPE=1SV=1	sp|P22629|SAV_STRAVStreptavidinOS=StreptomycesavidiniiPE=1SV=1	sp|P22629|SAV_STRAVStreptavidinOS=StreptomycesavidiniiPE=1SV=1	MSMS	Jonas_Str_B	StrpDtBio50_DtDigestr	603.311	2	603.312	1204.61	NaN	NaN	NaN	NaN	NaN	NaN	NaN	NaN	0.41417	1	0.41417	-0.085828	0.91417	0								0	0	0	0.01	1	15
STLVGHDTFTK	11	Unmodified	_STLVGHDTFTK_					0	0	0	0	0	sp|P22629|SAV_STRAVStreptavidinOS=StreptomycesavidiniiPE=1SV=1	sp|P22629|SAV_STRAVStreptavidinOS=StreptomycesavidiniiPE=1SV=1	sp|P22629|SAV_STRAVStreptavidinOS=StreptomycesavidiniiPE=1SV=1	MSMS	Jonas_Str_B	StrpDtBio50_DtDigestr	603.311	2	603.312	1204.61	NaN	NaN	NaN	NaN	NaN	NaN	NaN	NaN	0.75784	1	0.75784	0.25784	1.2578	0								0	0	0	0.01	1	26
STLVGHDTFTK	11	Unmodified	_STLVGHDTFTK_					0	0	0	0	0	sp|P22629|SAV_STRAVStreptavidinOS=StreptomycesavidiniiPE=1SV=1	sp|P22629|SAV_STRAVStreptavidinOS=StreptomycesavidiniiPE=1SV=1	sp|P22629|SAV_STRAVStreptavidinOS=StreptomycesavidiniiPE=1SV=1	MSMS	Jonas_Str_B	StrpDtBio50_DtDigestr	603.312	2	603.312	1204.61	NaN	NaN	NaN	NaN	NaN	NaN	NaN	NaN	1.0598	1	1.0598	0.55984	1.5598	0								0	0	0	0.01	1	36
STLVGHDTFTK	11	Unmodified	_STLVGHDTFTK_					0	0	0	0	0	sp|P22629|SAV_STRAVStreptavidinOS=StreptomycesavidiniiPE=1SV=1	sp|P22629|SAV_STRAVStreptavidinOS=StreptomycesavidiniiPE=1SV=1	sp|P22629|SAV_STRAVStreptavidinOS=StreptomycesavidiniiPE=1SV=1	MSMS	Jonas_Str_B	StrpDtBio50_DtDigestr	603.311	2	603.312	1204.61	NaN	NaN	NaN	NaN	NaN	NaN	NaN	NaN	1.3675	1	1.3675	0.8675	1.8675	0								0	0	0	0.01	1	46
STLVGHDTFTK	11	Unmodified	_STLVGHDTFTK_					0	0	0	0	0	sp|P22629|SAV_STRAVStreptavidinOS=StreptomycesavidiniiPE=1SV=1	sp|P22629|SAV_STRAVStreptavidinOS=StreptomycesavidiniiPE=1SV=1	sp|P22629|SAV_STRAVStreptavidinOS=StreptomycesavidiniiPE=1SV=1	MSMS	Jonas_Str_B	StrpDtBio50_DtDigestr	603.311	2	603.312	1204.61	NaN	NaN	NaN	NaN	NaN	NaN	NaN	NaN	1.7762	1	1.7762	1.2762	2.2762	-1.1921e-07								0	0	0	0.01	1	59
STLVGHDTFTK	11	Unmodified	_STLVGHDTFTK_					0	0	0	0	0	sp|P22629|SAV_STRAVStreptavidinOS=StreptomycesavidiniiPE=1SV=1	sp|P22629|SAV_STRAVStreptavidinOS=StreptomycesavidiniiPE=1SV=1	sp|P22629|SAV_STRAVStreptavidinOS=StreptomycesavidiniiPE=1SV=1	MSMS	Jonas_Str_B	StrpDtBio50_DtDigestr	402.543	3	402.544	1204.61	NaN	NaN	NaN	NaN	NaN	NaN	NaN	NaN	1.9452	1	1.9452	1.4452	2.4452	0								0	0	0	0.01	1	64
STLVGHDTFTK	11	Unmodified	_STLVGHDTFTK_					0	0	0	0	0	sp|P22629|SAV_STRAVStreptavidinOS=StreptomycesavidiniiPE=1SV=1	sp|P22629|SAV_STRAVStreptavidinOS=StreptomycesavidiniiPE=1SV=1	sp|P22629|SAV_STRAVStreptavidinOS=StreptomycesavidiniiPE=1SV=1	MSMS	Jonas_Str_B	StrpDtBio50_DtDigestr	402.543	3	402.544	1204.61	NaN	NaN	NaN	NaN	NaN	NaN	NaN	NaN	2.1798	1	2.1798	1.6798	2.6798	0								0	0	0	0.01	1	72
STLVGHDTFTK	11	Unmodified	_STLVGHDTFTK_					0	0	0	0	0	sp|P22629|SAV_STRAVStreptavidinOS=StreptomycesavidiniiPE=1SV=1	sp|P22629|SAV_STRAVStreptavidinOS=StreptomycesavidiniiPE=1SV=1	sp|P22629|SAV_STRAVStreptavidinOS=StreptomycesavidiniiPE=1SV=1	MSMS	Jonas_Str_B	StrpDtBio50_DtDigestr	402.544	3	402.544	1204.61	NaN	NaN	NaN	NaN	NaN	NaN	NaN	NaN	2.4687	1	2.4687	1.9687	2.9687	0								0	0	0	0.01	1	81
STLVGHDTFTK	11	Unmodified	_STLVGHDTFTK_					0	0	0	0	0	sp|P22629|SAV_STRAVStreptavidinOS=StreptomycesavidiniiPE=1SV=1	sp|P22629|SAV_STRAVStreptavidinOS=StreptomycesavidiniiPE=1SV=1	sp|P22629|SAV_STRAVStreptavidinOS=StreptomycesavidiniiPE=1SV=1	MSMS	Jonas_Str_B	StrpDtBio50_DtDigestr	603.311	2	603.312	1204.61	NaN	NaN	NaN	NaN	NaN	NaN	NaN	NaN	2.7265	1	2.7265	2.2265	3.2265	0								0	0	0	0.01	1	89
STLVGHDTFTK	11	Unmodified	_STLVGHDTFTK_					0	0	0	0	0	sp|P22629|SAV_STRAVStreptavidinOS=StreptomycesavidiniiPE=1SV=1	sp|P22629|SAV_STRAVStreptavidinOS=StreptomycesavidiniiPE=1SV=1	sp|P22629|SAV_STRAVStreptavidinOS=StreptomycesavidiniiPE=1SV=1	MSMS	Jonas_Str_B	StrpDtBio50_DtDigestr	402.542	3	402.544	1204.61	NaN	NaN	NaN	NaN	NaN	NaN	NaN	NaN	2.7652	1	2.7652	2.2652	3.2652	0								0	0	0	0.01	1	90
STLVGHDTFTK	11	Unmodified	_STLVGHDTFTK_					0	0	0	0	0	sp|P22629|SAV_STRAVStreptavidinOS=StreptomycesavidiniiPE=1SV=1	sp|P22629|SAV_STRAVStreptavidinOS=StreptomycesavidiniiPE=1SV=1	sp|P22629|SAV_STRAVStreptavidinOS=StreptomycesavidiniiPE=1SV=1	MSMS	Jonas_Str_B	StrpDtBio50_DtDigestr	603.31	2	603.312	1204.61	NaN	NaN	NaN	NaN	NaN	NaN	NaN	NaN	3.0003	1	3.0003	2.5003	3.5003	0								0	0	0	0.01	1	98
STLVGHDTFTK	11	Unmodified	_STLVGHDTFTK_					0	0	0	0	0	sp|P22629|SAV_STRAVStreptavidinOS=StreptomycesavidiniiPE=1SV=1	sp|P22629|SAV_STRAVStreptavidinOS=StreptomycesavidiniiPE=1SV=1	sp|P22629|SAV_STRAVStreptavidinOS=StreptomycesavidiniiPE=1SV=1	MSMS	Jonas_Str_B	StrpDtBio50_DtDigestr	402.543	3	402.544	1204.61	NaN	NaN	NaN	NaN	NaN	NaN	NaN	NaN	3.053	1	3.053	2.553	3.553	0								0	0	0	0.01	1	100
STLVGHDTFTK	11	Unmodified	_STLVGHDTFTK_					0	0	0	0	0	sp|P22629|SAV_STRAVStreptavidinOS=StreptomycesavidiniiPE=1SV=1	sp|P22629|SAV_STRAVStreptavidinOS=StreptomycesavidiniiPE=1SV=1	sp|P22629|SAV_STRAVStreptavidinOS=StreptomycesavidiniiPE=1SV=1	MSMS	Jonas_Str_B	StrpDtBio50_DtDigestr	603.313	2	603.312	1204.61	NaN	NaN	NaN	NaN	NaN	NaN	NaN	NaN	3.2533	1	3.2533	2.7533	3.7533	0								0	0	0	0.01	1	106
STLVGHDTFTK	11	Unmodified	_STLVGHDTFTK_					0	0	0	0	0	sp|P22629|SAV_STRAVStreptavidinOS=StreptomycesavidiniiPE=1SV=1	sp|P22629|SAV_STRAVStreptavidinOS=StreptomycesavidiniiPE=1SV=1	sp|P22629|SAV_STRAVStreptavidinOS=StreptomycesavidiniiPE=1SV=1	MSMS	Jonas_Str_B	StrpDtBio50_DtDigestr	402.543	3	402.544	1204.61	NaN	NaN	NaN	NaN	NaN	NaN	NaN	NaN	3.4018	1	3.4018	2.9018	3.9018	0								0	0	0	0.01	1	111
STLVGHDTFTK	11	Unmodified	_STLVGHDTFTK_					0	0	0	0	0	sp|P22629|SAV_STRAVStreptavidinOS=StreptomycesavidiniiPE=1SV=1	sp|P22629|SAV_STRAVStreptavidinOS=StreptomycesavidiniiPE=1SV=1	sp|P22629|SAV_STRAVStreptavidinOS=StreptomycesavidiniiPE=1SV=1	MSMS	Jonas_Str_B	StrpDtBio50_DtDigestr	402.544	3	402.544	1204.61	NaN	NaN	NaN	NaN	NaN	NaN	NaN	NaN	3.6855	1	3.6855	3.1855	4.1855	2.3842e-07								0	0	0	0.01	1	120
STLVGHDTFTK	11	Unmodified	_STLVGHDTFTK_					0	0	0	0	0	sp|P22629|SAV_STRAVStreptavidinOS=StreptomycesavidiniiPE=1SV=1	sp|P22629|SAV_STRAVStreptavidinOS=StreptomycesavidiniiPE=1SV=1	sp|P22629|SAV_STRAVStreptavidinOS=StreptomycesavidiniiPE=1SV=1	MSMS	Jonas_Str_B	StrpDtBio50_DtDigestr	603.309	2	603.312	1204.61	NaN	NaN	NaN	NaN	NaN	NaN	NaN	NaN	4.1935	1	4.1935	3.6935	4.6935	0								0	0	0	0.01	1	136
STLVGHDTFTK	11	Unmodified	_STLVGHDTFTK_					0	0	0	0	0	sp|P22629|SAV_STRAVStreptavidinOS=StreptomycesavidiniiPE=1SV=1	sp|P22629|SAV_STRAVStreptavidinOS=StreptomycesavidiniiPE=1SV=1	sp|P22629|SAV_STRAVStreptavidinOS=StreptomycesavidiniiPE=1SV=1	MSMS	Jonas_Str_B	StrpDtBio50_DtDigestr	603.31	2	603.312	1204.61	NaN	NaN	NaN	NaN	NaN	NaN	NaN	NaN	4.5545	1	4.5545	4.0545	5.0545	0								0	0	0	0.01	1	147
STLVGHDTFTK	11	Unmodified	_STLVGHDTFTK_					0	0	0	0	0	sp|P22629|SAV_STRAVStreptavidinOS=StreptomycesavidiniiPE=1SV=1	sp|P22629|SAV_STRAVStreptavidinOS=StreptomycesavidiniiPE=1SV=1	sp|P22629|SAV_STRAVStreptavidinOS=StreptomycesavidiniiPE=1SV=1	MSMS	Jonas_Str_B	StrpDtBio50_DtDigestr	402.543	3	402.544	1204.61	NaN	NaN	NaN	NaN	NaN	NaN	NaN	NaN	4.5914	1	4.5914	4.0914	5.0914	4.7684e-07								0	0	0	0.01	1	148
STLVGHDTFTK	11	Unmodified	_STLVGHDTFTK_					0	0	0	0	0	sp|P22629|SAV_STRAVStreptavidinOS=StreptomycesavidiniiPE=1SV=1	sp|P22629|SAV_STRAVStreptavidinOS=StreptomycesavidiniiPE=1SV=1	sp|P22629|SAV_STRAVStreptavidinOS=StreptomycesavidiniiPE=1SV=1	MSMS	Jonas_Str_B	StrpDtBio50_DtDigestr	603.311	2	603.312	1204.61	NaN	NaN	NaN	NaN	NaN	NaN	NaN	NaN	4.8042	1	4.8042	4.3042	5.3042	4.7684e-07								0	0	0	0.01	1	155
STLVGHDTFTK	11	Unmodified	_STLVGHDTFTK_					0	0	0	0	0	sp|P22629|SAV_STRAVStreptavidinOS=StreptomycesavidiniiPE=1SV=1	sp|P22629|SAV_STRAVStreptavidinOS=StreptomycesavidiniiPE=1SV=1	sp|P22629|SAV_STRAVStreptavidinOS=StreptomycesavidiniiPE=1SV=1	MSMS	Jonas_Str_B	StrpDtBio50_DtDigestr	603.312	2	603.312	1204.61	NaN	NaN	NaN	NaN	NaN	NaN	NaN	NaN	5.1262	1	5.1262	4.6262	5.6262	0								0	0	0	0.01	1	165
STLVGHDTFTK	11	Unmodified	_STLVGHDTFTK_					0	0	0	0	0	sp|P22629|SAV_STRAVStreptavidinOS=StreptomycesavidiniiPE=1SV=1	sp|P22629|SAV_STRAVStreptavidinOS=StreptomycesavidiniiPE=1SV=1	sp|P22629|SAV_STRAVStreptavidinOS=StreptomycesavidiniiPE=1SV=1	MSMS	Jonas_Str_B	StrpDtBio50_DtDigestr	402.544	3	402.544	1204.61	NaN	NaN	NaN	NaN	NaN	NaN	NaN	NaN	5.7245	1	5.7245	5.2245	6.2245	0								0	0	0	0.01	1	184
STLVGHDTFTK	11	Unmodified	_STLVGHDTFTK_					0	0	0	0	0	sp|P22629|SAV_STRAVStreptavidinOS=StreptomycesavidiniiPE=1SV=1	sp|P22629|SAV_STRAVStreptavidinOS=StreptomycesavidiniiPE=1SV=1	sp|P22629|SAV_STRAVStreptavidinOS=StreptomycesavidiniiPE=1SV=1	MSMS	Jonas_Str_B	StrpDtBio50_DtDigestr	402.542	3	402.544	1204.61	NaN	NaN	NaN	NaN	NaN	NaN	NaN	NaN	6.0105	1	6.0105	5.5105	6.5105	-4.7684e-07								0	0	0	0.01	1	193
STLVGHDTFTK	11	Unmodified	_STLVGHDTFTK_					0	0	0	0	0	sp|P22629|SAV_STRAVStreptavidinOS=StreptomycesavidiniiPE=1SV=1	sp|P22629|SAV_STRAVStreptavidinOS=StreptomycesavidiniiPE=1SV=1	sp|P22629|SAV_STRAVStreptavidinOS=StreptomycesavidiniiPE=1SV=1	MSMS	Jonas_Str_B	StrpDtBio50_DtDigestr	402.543	3	402.544	1204.61	NaN	NaN	NaN	NaN	NaN	NaN	NaN	NaN	6.5772	1	6.5772	6.0772	7.0772	0								0	0	0	0.01	1	211
STLVGHDTFTK	11	Unmodified	_STLVGHDTFTK_					0	0	0	0	0	sp|P22629|SAV_STRAVStreptavidinOS=StreptomycesavidiniiPE=1SV=1	sp|P22629|SAV_STRAVStreptavidinOS=StreptomycesavidiniiPE=1SV=1	sp|P22629|SAV_STRAVStreptavidinOS=StreptomycesavidiniiPE=1SV=1	MSMS	Jonas_Str_B	StrpDtBio50_DtDigestr	402.878	3	402.544	1204.61	NaN	NaN	NaN	NaN	NaN	NaN	NaN	NaN	6.8598	1	6.8598	6.3598	7.3598	4.7684e-07								0	0	0	0.01	1	220
STLVGHDTFTK	11	Unmodified	_STLVGHDTFTK_					0	0	0	0	0	sp|P22629|SAV_STRAVStreptavidinOS=StreptomycesavidiniiPE=1SV=1	sp|P22629|SAV_STRAVStreptavidinOS=StreptomycesavidiniiPE=1SV=1	sp|P22629|SAV_STRAVStreptavidinOS=StreptomycesavidiniiPE=1SV=1	MSMS	Jonas_Str_B	StrpDtBio50_DtDigestr	603.31	2	603.312	1204.61	NaN	NaN	NaN	NaN	NaN	NaN	NaN	NaN	31.736	1	31.736	31.236	32.236	0								0	0	0	0.01	1	1307
STLVGHDTFTK	11	Unmodified	_STLVGHDTFTK_					0	0	0	0	0	sp|P22629|SAV_STRAVStreptavidinOS=StreptomycesavidiniiPE=1SV=1	sp|P22629|SAV_STRAVStreptavidinOS=StreptomycesavidiniiPE=1SV=1	sp|P22629|SAV_STRAVStreptavidinOS=StreptomycesavidiniiPE=1SV=1	MSMS	Jonas_Str_B	StrpDtBio50_DtDigestr	603.311	2	603.312	1204.61	NaN	NaN	NaN	NaN	NaN	NaN	NaN	NaN	32.104	1	32.104	31.604	32.604	0								0	0	0	0.01	1	1319
STLVGHDTFTK	11	Unmodified	_STLVGHDTFTK_					0	0	0	0	0	sp|P22629|SAV_STRAVStreptavidinOS=StreptomycesavidiniiPE=1SV=1	sp|P22629|SAV_STRAVStreptavidinOS=StreptomycesavidiniiPE=1SV=1	sp|P22629|SAV_STRAVStreptavidinOS=StreptomycesavidiniiPE=1SV=1	MULTI-SECPEP	Jonas_Str_B	StrpDtBio50_DtDigestr	402.542	3	402.544	1204.61	NaN	0.066207	2.6651e-05	-4.2586	-0.0017143	-4.1924	-0.0016876	402.876	5.9294	0.16049	5.9294	5.8653	6.0258	0					5	3	2	0	0	0	0.01	1	193
STLVGHDTFTK	11	Unmodified	_STLVGHDTFTK_					0	0	0	0	0	sp|P22629|SAV_STRAVStreptavidinOS=StreptomycesavidiniiPE=1SV=1	sp|P22629|SAV_STRAVStreptavidinOS=StreptomycesavidiniiPE=1SV=1	sp|P22629|SAV_STRAVStreptavidinOS=StreptomycesavidiniiPE=1SV=1	MULTI-SECPEP	Jonas_Str_B	StrpDtBio50_DtDigestr	402.544	3	402.544	1204.61	139645	0.074566	3.0016e-05	-2.4377	-0.00098127	-2.3631	-0.00095125	402.541	30.733	1.5545	30.733	30.289	31.843	0					18	15	2	0	0	0	0.01	1	1261
VKPSAAS	7	Unmodified	_VKPSAAS_					0	0	0	0	1	sp|P22629|SAV_STRAVStreptavidinOS=StreptomycesavidiniiPE=1SV=1	sp|P22629|SAV_STRAVStreptavidinOS=StreptomycesavidiniiPE=1SV=1	sp|P22629|SAV_STRAVStreptavidinOS=StreptomycesavidiniiPE=1SV=1	MULTI-MSMS	Jonas_Str_B	StrpDtBio50_DtDigestr	330.19	2	330.19	658.365	147452	0.06688	2.2083e-05	-0.3095	-0.00010219	-0.24262	-8.0109e-05	330.19	7.8311	2.092	7.8311	7.5311	9.6231	-4.7684e-07					52	42	4	0	0	0	0.01	7	245
VKPSAAS	7	Unmodified	_VKPSAAS_					0	0	0	0	1	sp|P22629|SAV_STRAVStreptavidinOS=StreptomycesavidiniiPE=1SV=1	sp|P22629|SAV_STRAVStreptavidinOS=StreptomycesavidiniiPE=1SV=1	sp|P22629|SAV_STRAVStreptavidinOS=StreptomycesavidiniiPE=1SV=1	MULTI-MSMS	Jonas_Str_B	StrpDtBio50_DtDigestr	330.19	2	330.19	658.365	147452	0.067528	2.2297e-05	0.97896	0.00032324	1.0465	0.00034554	330.19	9.8821	0.53867	9.8821	9.6231	10.162	0					9	7	2	0	0	0	0.01	2	309
YDSAPATDGSGTALGWTVAWK	21	Unmodified	_YDSAPATDGSGTALGWTVAWK_					0	0	0	0	0	sp|P22629|SAV_STRAVStreptavidinOS=StreptomycesavidiniiPE=1SV=1	sp|P22629|SAV_STRAVStreptavidinOS=StreptomycesavidiniiPE=1SV=1	sp|P22629|SAV_STRAVStreptavidinOS=StreptomycesavidiniiPE=1SV=1	MULTI-MSMS	Jonas_Str_B	StrpDtBio50_DtDigestr	1080.01	2	1077.51	2153.01	81502.2	0.069797	7.5207e-05	0.44018	0.00047429	0.50997	0.0005495	1078.01	16.011	2.9765	16.011	15.428	18.405	0					145	25	7	0	0	0	0.01	9	611
YDSAPATDGSGTALGWTVAWK	21	Unmodified	_YDSAPATDGSGTALGWTVAWK_					0	0	0	0	0	sp|P22629|SAV_STRAVStreptavidinOS=StreptomycesavidiniiPE=1SV=1	sp|P22629|SAV_STRAVStreptavidinOS=StreptomycesavidiniiPE=1SV=1	sp|P22629|SAV_STRAVStreptavidinOS=StreptomycesavidiniiPE=1SV=1	MULTI-MSMS	Jonas_Str_B	StrpDtBio50_DtDigestr	719.011	3	718.676	2153.01	100460	0.069806	5.0168e-05	-0.92569	-0.00066527	-0.85588	-0.0006151	719.01	16.305	2.5483	16.305	15.59	18.138	0					93	23	5	0	0	0	0.01	6	625
YDSAPATDGSGTALGWTVAWK	21	Unmodified	_YDSAPATDGSGTALGWTVAWK_					0	0	0	0	0	sp|P22629|SAV_STRAVStreptavidinOS=StreptomycesavidiniiPE=1SV=1	sp|P22629|SAV_STRAVStreptavidinOS=StreptomycesavidiniiPE=1SV=1	sp|P22629|SAV_STRAVStreptavidinOS=StreptomycesavidiniiPE=1SV=1	MULTI-MSMS	Jonas_Str_B	StrpDtBio50_DtDigestr	719.011	3	718.676	2153.01	100490	0.07095	5.099e-05	-0.46057	-0.000331	-0.38962	-0.00028001	719.01	19.472	8.3155	19.472	17.538	25.853	0					173	70	4	0	0	0	0.01	22	744
YDSAPATDGSGTALGWTVAWK	21	Unmodified	_YDSAPATDGSGTALGWTVAWK_					0	0	0	0	0	sp|P22629|SAV_STRAVStreptavidinOS=StreptomycesavidiniiPE=1SV=1	sp|P22629|SAV_STRAVStreptavidinOS=StreptomycesavidiniiPE=1SV=1	sp|P22629|SAV_STRAVStreptavidinOS=StreptomycesavidiniiPE=1SV=1	MULTI-MSMS	Jonas_Str_B	StrpDtBio50_DtDigestr	1078.01	2	1077.51	2153.01	81653.9	0.071159	7.6675e-05	0.55604	0.00059914	0.6272	0.00067581	1078.01	19.729	12.151	19.729	18.138	30.289	0					392	97	6	0	0	0	0.01	38	748
YDSAPATDGSGTALGWTVAWK	21	Unmodified	_YDSAPATDGSGTALGWTVAWK_					0	0	0	0	0	sp|P22629|SAV_STRAVStreptavidinOS=StreptomycesavidiniiPE=1SV=1	sp|P22629|SAV_STRAVStreptavidinOS=StreptomycesavidiniiPE=1SV=1	sp|P22629|SAV_STRAVStreptavidinOS=StreptomycesavidiniiPE=1SV=1	MULTI-MSMS	Jonas_Str_B	StrpDtBio50_DtDigestr	719.01	3	718.676	2153.01	100490	0.073569	5.2872e-05	-0.24711	-0.00017759	-0.17354	-0.00012472	718.676	26.734	6.2363	26.734	25.853	32.089	0					116	52	4	0	0	0	0.01	10	1087
YDSAPATDGSGTALGWTVAWK	21	Unmodified	_YDSAPATDGSGTALGWTVAWK_					0	0	0	0	0	sp|P22629|SAV_STRAVStreptavidinOS=StreptomycesavidiniiPE=1SV=1	sp|P22629|SAV_STRAVStreptavidinOS=StreptomycesavidiniiPE=1SV=1	sp|P22629|SAV_STRAVStreptavidinOS=StreptomycesavidiniiPE=1SV=1	MULTI-MSMS	Jonas_Str_B	StrpDtBio50_DtDigestr	1078.01	2	1077.51	2153.01	82147.9	0.075172	8.0999e-05	0.41224	0.0004442	0.48742	0.0005252	1078.01	32.609	0.42788	32.609	32.493	32.92	0					19	9	3	0	0	0	0.01	1	1337
YVLTGRYDSAPATDGSGTALGWTVAWK	27	Unmodified	_YVLTGRYDSAPATDGSGTALGWTVAWK_					0	0	0	0	1	sp|P22629|SAV_STRAVStreptavidinOS=StreptomycesavidiniiPE=1SV=1	sp|P22629|SAV_STRAVStreptavidinOS=StreptomycesavidiniiPE=1SV=1	sp|P22629|SAV_STRAVStreptavidinOS=StreptomycesavidiniiPE=1SV=1	MULTI-MSMS	Jonas_Str_B	StrpDtBio50_DtDigestr	948.806	3	948.471	2842.39	83847.6	0.071196	6.7528e-05	0.28155	0.00026704	0.35274	0.00033457	949.14	20.695	2.944	20.695	18.934	21.878	1.9073e-06					61	25	4	0	0	0	0.01	2	828
YVLTGRYDSAPATDGSGTALGWTVAWK	27	Unmodified	_YVLTGRYDSAPATDGSGTALGWTVAWK_					0	0	0	0	1	sp|P22629|SAV_STRAVStreptavidinOS=StreptomycesavidiniiPE=1SV=1	sp|P22629|SAV_STRAVStreptavidinOS=StreptomycesavidiniiPE=1SV=1	sp|P22629|SAV_STRAVStreptavidinOS=StreptomycesavidiniiPE=1SV=1	MULTI-MSMS	Jonas_Str_B	StrpDtBio50_DtDigestr	948.806	3	948.471	2842.39	83847.6	0.071972	6.8263e-05	-0.10301	-9.7706e-05	-0.031043	-2.9443e-05	949.14	22.448	4.3481	22.448	21.648	25.996	0					92	33	4	0	0	0	0.01	7	916
YVLTGRYDSAPATDGSGTALGWTVAWK	27	Unmodified	_YVLTGRYDSAPATDGSGTALGWTVAWK_					0	0	0	0	1	sp|P22629|SAV_STRAVStreptavidinOS=StreptomycesavidiniiPE=1SV=1	sp|P22629|SAV_STRAVStreptavidinOS=StreptomycesavidiniiPE=1SV=1	sp|P22629|SAV_STRAVStreptavidinOS=StreptomycesavidiniiPE=1SV=1	MULTI-MSMS	Jonas_Str_B	StrpDtBio50_DtDigestr	949.138	3	948.471	2842.39	84420.8	0.073418	6.9635e-05	0.12441	0.000118	0.19783	0.00018764	948.472	27.206	5.622	27.206	25.853	31.475	0					87	43	4	0	0	0	0.01	5	1094
[truncated: 15 more columns]

## Sheet: BirA-DtBio_ClinkerPD Evidence
Sequence	Length	Modifications	Modified sequence	ClinkerFragment->Lys Probabilities	Oxidation (M) Probabilities	ClinkerFragment->Lys Score Diffs	Oxidation (M) Score Diffs	Acetyl (Protein N-term)	ClinkerFragment->Lys	ClinkerFragment->N-term	Oxidation (M)	Missed cleavages	Proteins	Leading proteins	Leading razor protein	Type	Raw file	Experiment	MS/MS m/z	Charge	m/z	Mass	Resolution	Uncalibrated - Calibrated m/z [ppm]	Uncalibrated - Calibrated m/z [Da]	Mass error [ppm]	Mass error [Da]	Uncalibrated mass error [ppm]	Uncalibrated mass error [Da]	Max intensity m/z 0	Retention time	Retention length	Calibrated retention time	Calibrated retention time start	Calibrated retention time finish	Retention time calibration	Match time difference	Match m/z difference	Match q-value	Match score	Number of data points	Number of scans	Number of isotopic peaks	PIF	Fraction of total spectrum	Base peak fraction	PEP	MS/MS count	MS/MS scan number
TGDAAQIVIGAGINMAMR	18	2 Oxidation (M)	_TGDAAQIVIGAGINM(ox)AM(ox)R_		TGDAAQIVIGAGINM(1)AM(1)R		TGDAAQIVIGAGINM(109.14)AM(109.14)R	0	0	0	2	0	sp|P06709|BIRA_ECOLIBifunctionalligase/repressorBirAOS=Escherichiacoli(strainK12)GN=birAPE=1SV=1	sp|P06709|BIRA_ECOLIBifunctionalligase/repressorBirAOS=Escherichiacoli(strainK12)GN=birAPE=1SV=1	sp|P06709|BIRA_ECOLIBifunctionalligase/repressorBirAOS=Escherichiacoli(strainK12)GN=birAPE=1SV=1	MULTI-MSMS	37_J5_pd	BirADtBio100_ClinkerPD	607.981	3	607.638	1819.89	27801.1	18.017	0.010948	-0.67478	-0.00041002	17.342	0.010538	607.972	38.18	0.53239	38.18	37.91	38.442	3.8147e-06					82	38	4	0	0	0	0.01	1	3538
KLAGILVELTGK	12	ClinkerFragment->Lys	_K(cl)LAGILVELTGK_	K(1)LAGILVELTGK		K(82.5)LAGILVELTGK(-82.5)		0	1	0	0	1	sp|P06709|BIRA_ECOLIBifunctionalligase/repressorBirAOS=Escherichiacoli(strainK12)GN=birAPE=1SV=1	sp|P06709|BIRA_ECOLIBifunctionalligase/repressorBirAOS=Escherichiacoli(strainK12)GN=birAPE=1SV=1	sp|P06709|BIRA_ECOLIBifunctionalligase/repressorBirAOS=Escherichiacoli(strainK12)GN=birAPE=1SV=1	MULTI-MSMS	37_J5_pd	BirADtBio100_ClinkerPD	464.638	3	464.629	1390.87	31200.5	18.016	0.0083708	-0.36739	-0.0001707	17.649	0.0082001	464.629	43.049	1.0595	43.049	42.638	43.698	-3.8147e-06					234	75	4	0	0	0	0.01	2	3970
KLAGILVELTGK	12	ClinkerFragment->Lys	_K(cl)LAGILVELTGK_	K(1)LAGILVELTGK		K(125.23)LAGILVELTGK(-125.23)		0	1	0	0	1	sp|P06709|BIRA_ECOLIBifunctionalligase/repressorBirAOS=Escherichiacoli(strainK12)GN=birAPE=1SV=1	sp|P06709|BIRA_ECOLIBifunctionalligase/repressorBirAOS=Escherichiacoli(strainK12)GN=birAPE=1SV=1	sp|P06709|BIRA_ECOLIBifunctionalligase/repressorBirAOS=Escherichiacoli(strainK12)GN=birAPE=1SV=1	MULTI-MSMS	37_J5_pd	BirADtBio100_ClinkerPD	696.455	2	696.44	1390.87	25425	18.016	0.012547	-0.42398	-0.00029527	17.592	0.012252	696.44	43.007	0.98782	43.007	42.667	43.655	0					200	70	4	0	0	0	0.01	2	3971
LIALLANGEFHSGEQLGETLGMSR	24	Oxidation (M)	_LIALLANGEFHSGEQLGETLGM(ox)SR_		LIALLANGEFHSGEQLGETLGM(1)SR		LIALLANGEFHSGEQLGETLGM(120.9)SR	0	0	0	1	0	sp|P06709|BIRA_ECOLIBifunctionalligase/repressorBirAOS=Escherichiacoli(strainK12)GN=birAPE=1SV=1	sp|P06709|BIRA_ECOLIBifunctionalligase/repressorBirAOS=Escherichiacoli(strainK12)GN=birAPE=1SV=1	sp|P06709|BIRA_ECOLIBifunctionalligase/repressorBirAOS=Escherichiacoli(strainK12)GN=birAPE=1SV=1	MULTI-MSMS	37_J5_pd	BirADtBio100_ClinkerPD	854.116	3	853.767	2558.28	22754.4	18.016	0.015382	0.052633	4.4936e-05	18.069	0.015427	854.102	45.33	0.78357	45.33	45.02	45.804	0					197	55	5	0	0	0	0.01	1	4194
LIALLANGEFHSGEQLGETLGMSR	24	Oxidation (M)	_LIALLANGEFHSGEQLGETLGM(ox)SR_		LIALLANGEFHSGEQLGETLGM(1)SR		LIALLANGEFHSGEQLGETLGM(108.25)SR	0	0	0	1	0	sp|P06709|BIRA_ECOLIBifunctionalligase/repressorBirAOS=Escherichiacoli(strainK12)GN=birAPE=1SV=1	sp|P06709|BIRA_ECOLIBifunctionalligase/repressorBirAOS=Escherichiacoli(strainK12)GN=birAPE=1SV=1	sp|P06709|BIRA_ECOLIBifunctionalligase/repressorBirAOS=Escherichiacoli(strainK12)GN=birAPE=1SV=1	MULTI-MSMS	37_J5_pd	BirADtBio100_ClinkerPD	854.119	3	853.767	2558.28	23650.6	18.01	0.015377	-0.25677	-0.00021922	17.753	0.015157	854.102	49.295	0.41781	49.295	49.094	49.512	0					35	26	2	0	0	0	0.01	1	4587
LIALLANGEFHSGEQLGETLGMSR	24	Oxidation (M)	_LIALLANGEFHSGEQLGETLGM(ox)SR_		LIALLANGEFHSGEQLGETLGM(1)SR		LIALLANGEFHSGEQLGETLGM(137.99)SR	0	0	0	1	0	sp|P06709|BIRA_ECOLIBifunctionalligase/repressorBirAOS=Escherichiacoli(strainK12)GN=birAPE=1SV=1	sp|P06709|BIRA_ECOLIBifunctionalligase/repressorBirAOS=Escherichiacoli(strainK12)GN=birAPE=1SV=1	sp|P06709|BIRA_ECOLIBifunctionalligase/repressorBirAOS=Escherichiacoli(strainK12)GN=birAPE=1SV=1	MULTI-SECPEP	37_J5_pd	BirADtBio100_ClinkerPD	854.111	3	853.767	2558.28	22364.8	18.01	0.015377	0.011962	1.0213e-05	18.022	0.015387	854.102	45.782	0.30016	45.782	45.703	46.003	0					23	19	2	0	0	0	0.01	1	4268
QGALLLEQDGIIKPWMGGEISLR	23	Oxidation (M)	_QGALLLEQDGIIKPWM(ox)GGEISLR_		QGALLLEQDGIIKPWM(1)GGEISLR		QGALLLEQDGIIKPWM(61.94)GGEISLR	0	0	0	1	1	sp|P06709|BIRA_ECOLIBifunctionalligase/repressorBirAOS=Escherichiacoli(strainK12)GN=birAPE=1SV=1	sp|P06709|BIRA_ECOLIBifunctionalligase/repressorBirAOS=Escherichiacoli(strainK12)GN=birAPE=1SV=1	sp|P06709|BIRA_ECOLIBifunctionalligase/repressorBirAOS=Escherichiacoli(strainK12)GN=birAPE=1SV=1	MULTI-MSMS	37_J5_pd	BirADtBio100_ClinkerPD	847.804	3	847.456	2539.35	22370	18.016	0.015268	0.38466	0.00032599	18.401	0.015594	847.79	49.172	0.51936	49.172	48.936	49.455	0					95	34	4	0	0	0	0.01	1	4561
AALELFEQEGLAPYLSR	17	Unmodified	_AALELFEQEGLAPYLSR_					0	0	0	0	0	sp|P06709|BIRA_ECOLIBifunctionalligase/repressorBirAOS=Escherichiacoli(strainK12)GN=birAPE=1SV=1	sp|P06709|BIRA_ECOLIBifunctionalligase/repressorBirAOS=Escherichiacoli(strainK12)GN=birAPE=1SV=1	sp|P06709|BIRA_ECOLIBifunctionalligase/repressorBirAOS=Escherichiacoli(strainK12)GN=birAPE=1SV=1	MULTI-MSMS	37_J5_pd	BirADtBio100_ClinkerPD	954.018	2	953.999	1905.98	21222.8	18.016	0.017188	1.4132	0.0013482	19.43	0.018536	954.502	52.506	1.0902	52.506	52.105	53.195	0					322	69	6	0	0	0	0.01	2	4874
AALELFEQEGLAPYLSR	17	Unmodified	_AALELFEQEGLAPYLSR_					0	0	0	0	0	sp|P06709|BIRA_ECOLIBifunctionalligase/repressorBirAOS=Escherichiacoli(strainK12)GN=birAPE=1SV=1	sp|P06709|BIRA_ECOLIBifunctionalligase/repressorBirAOS=Escherichiacoli(strainK12)GN=birAPE=1SV=1	sp|P06709|BIRA_ECOLIBifunctionalligase/repressorBirAOS=Escherichiacoli(strainK12)GN=birAPE=1SV=1	MULTI-MSMS	37_J5_pd	BirADtBio100_ClinkerPD	636.349	3	636.335	1905.98	26326.7	18.017	0.011465	0.025481	1.6214e-05	18.043	0.011481	636.669	52.55	0.85817	52.55	52.16	53.018	0					214	54	5	0	0	0	0.01	1	4879
AALELFEQEGLAPYLSR	17	Unmodified	_AALELFEQEGLAPYLSR_					0	0	0	0	0	sp|P06709|BIRA_ECOLIBifunctionalligase/repressorBirAOS=Escherichiacoli(strainK12)GN=birAPE=1SV=1	sp|P06709|BIRA_ECOLIBifunctionalligase/repressorBirAOS=Escherichiacoli(strainK12)GN=birAPE=1SV=1	sp|P06709|BIRA_ECOLIBifunctionalligase/repressorBirAOS=Escherichiacoli(strainK12)GN=birAPE=1SV=1	MULTI-MSMS	37_J5_pd	BirADtBio100_ClinkerPD	954.52	2	953.999	1905.98	21026.7	18.014	0.017185	1.3156	0.0012551	19.33	0.01844	954.501	55.023	0.55149	55.023	54.753	55.305	3.8147e-06					98	39	3	0	0	0	0.01	1	5131
DWGVDVFTVPGK	12	Unmodified	_DWGVDVFTVPGK_					0	0	0	0	0	sp|P06709|BIRA_ECOLIBifunctionalligase/repressorBirAOS=Escherichiacoli(strainK12)GN=birAPE=1SV=1	sp|P06709|BIRA_ECOLIBifunctionalligase/repressorBirAOS=Escherichiacoli(strainK12)GN=birAPE=1SV=1	sp|P06709|BIRA_ECOLIBifunctionalligase/repressorBirAOS=Escherichiacoli(strainK12)GN=birAPE=1SV=1	MULTI-MSMS	37_J5_pd	BirADtBio100_ClinkerPD	660.348	2	660.335	1318.66	26668.5	18.016	0.011896	-0.1548	-0.00010222	17.861	0.011794	660.335	47.862	0.58353	47.862	47.611	48.195	-3.8147e-06					101	39	3	0	0	0	0.01	1	4442
GYSLPEPIQLLNAK	14	Unmodified	_GYSLPEPIQLLNAK_					0	0	0	0	0	sp|P06709|BIRA_ECOLIBifunctionalligase/repressorBirAOS=Escherichiacoli(strainK12)GN=birAPE=1SV=1	sp|P06709|BIRA_ECOLIBifunctionalligase/repressorBirAOS=Escherichiacoli(strainK12)GN=birAPE=1SV=1	sp|P06709|BIRA_ECOLIBifunctionalligase/repressorBirAOS=Escherichiacoli(strainK12)GN=birAPE=1SV=1	MULTI-MSMS	37_J5_pd	BirADtBio100_ClinkerPD	771.946	2	771.93	1541.85	23964	18.016	0.013907	-0.052927	-4.0856e-05	17.963	0.013866	771.93	49.803	0.7566	49.803	49.455	50.212	0					168	52	4	0	0	0	0.01	1	4620
KLAGILVELTGK	12	Unmodified	_KLAGILVELTGK_					0	0	0	0	1	sp|P06709|BIRA_ECOLIBifunctionalligase/repressorBirAOS=Escherichiacoli(strainK12)GN=birAPE=1SV=1	sp|P06709|BIRA_ECOLIBifunctionalligase/repressorBirAOS=Escherichiacoli(strainK12)GN=birAPE=1SV=1	sp|P06709|BIRA_ECOLIBifunctionalligase/repressorBirAOS=Escherichiacoli(strainK12)GN=birAPE=1SV=1	MULTI-MSMS	37_J5_pd	BirADtBio100_ClinkerPD	621.909	2	621.395	1240.78	27504.4	18.013	0.011193	-0.54378	-0.0003379	17.469	0.010855	621.395	42.285	0.47892	42.285	42.067	42.545	0					55	35	2	0	0	0	0.01	1	3922
KLAGILVELTGK	12	Unmodified	_KLAGILVELTGK_					0	0	0	0	1	sp|P06709|BIRA_ECOLIBifunctionalligase/repressorBirAOS=Escherichiacoli(strainK12)GN=birAPE=1SV=1	sp|P06709|BIRA_ECOLIBifunctionalligase/repressorBirAOS=Escherichiacoli(strainK12)GN=birAPE=1SV=1	sp|P06709|BIRA_ECOLIBifunctionalligase/repressorBirAOS=Escherichiacoli(strainK12)GN=birAPE=1SV=1	MULTI-MSMS	37_J5_pd	BirADtBio100_ClinkerPD	414.606	3	414.599	1240.78	33106.3	18.011	0.0074675	-0.09166	-3.8002e-05	17.92	0.0074295	414.599	42.308	0.47379	42.308	42.102	42.576	0					59	34	2	0	0	0	0.01	1	3924
KLAGILVELTGK	12	Unmodified	_KLAGILVELTGK_					0	0	0	0	1	sp|P06709|BIRA_ECOLIBifunctionalligase/repressorBirAOS=Escherichiacoli(strainK12)GN=birAPE=1SV=1	sp|P06709|BIRA_ECOLIBifunctionalligase/repressorBirAOS=Escherichiacoli(strainK12)GN=birAPE=1SV=1	sp|P06709|BIRA_ECOLIBifunctionalligase/repressorBirAOS=Escherichiacoli(strainK12)GN=birAPE=1SV=1	MULTI-MSMS	37_J5_pd	BirADtBio100_ClinkerPD	414.605	3	414.599	1240.78	32587.1	18.012	0.0074679	-2.4568	-0.0010186	15.556	0.0064493	414.598	60.424	0.44737	60.424	60.236	60.683	-3.8147e-06					57	31	2	0	0	0	0.01	1	5662
LAGILVELTGK	11	Unmodified	_LAGILVELTGK_					0	0	0	0	0	sp|P06709|BIRA_ECOLIBifunctionalligase/repressorBirAOS=Escherichiacoli(strainK12)GN=birAPE=1SV=1	sp|P06709|BIRA_ECOLIBifunctionalligase/repressorBirAOS=Escherichiacoli(strainK12)GN=birAPE=1SV=1	sp|P06709|BIRA_ECOLIBifunctionalligase/repressorBirAOS=Escherichiacoli(strainK12)GN=birAPE=1SV=1	MULTI-MSMS	37_J5_pd	BirADtBio100_ClinkerPD	557.356	2	557.348	1112.68	28394.1	18.016	0.010041	-0.75053	-0.0004183	17.265	0.0096227	557.347	47.016	0.61809	47.016	46.798	47.416	0					100	41	3	0	0	0	0.01	1	4356
LDNFINRPVK	10	Unmodified	_LDNFINRPVK_					0	0	0	0	1	sp|P06709|BIRA_ECOLIBifunctionalligase/repressorBirAOS=Escherichiacoli(strainK12)GN=birAPE=1SV=1	sp|P06709|BIRA_ECOLIBifunctionalligase/repressorBirAOS=Escherichiacoli(strainK12)GN=birAPE=1SV=1	sp|P06709|BIRA_ECOLIBifunctionalligase/repressorBirAOS=Escherichiacoli(strainK12)GN=birAPE=1SV=1	MULTI-MSMS	37_J5_pd	BirADtBio100_ClinkerPD	405.907	3	405.9	1214.68	33621.4	18.014	0.007312	-1.3785	-0.00055952	16.636	0.0067525	405.899	25.932	0.57569	25.932	25.69	26.266	0					70	32	3	0	0	0	0.01	1	2376
LDNFINRPVK	10	Unmodified	_LDNFINRPVK_					0	0	0	0	1	sp|P06709|BIRA_ECOLIBifunctionalligase/repressorBirAOS=Escherichiacoli(strainK12)GN=birAPE=1SV=1	sp|P06709|BIRA_ECOLIBifunctionalligase/repressorBirAOS=Escherichiacoli(strainK12)GN=birAPE=1SV=1	sp|P06709|BIRA_ECOLIBifunctionalligase/repressorBirAOS=Escherichiacoli(strainK12)GN=birAPE=1SV=1	MULTI-MSMS	37_J5_pd	BirADtBio100_ClinkerPD	608.355	2	608.346	1214.68	27270	18.01	0.010956	-1.8581	-0.0011303	16.152	0.009826	608.344	25.884	0.43435	25.884	25.76	26.194	-1.9073e-06					30	23	2	0	0	0	0.01	1	2384
LGADKVR	7	Unmodified	_LGADKVR_					0	0	0	0	1	sp|P06709|BIRA_ECOLIBifunctionalligase/repressorBirAOS=Escherichiacoli(strainK12)GN=birAPE=1SV=1	sp|P06709|BIRA_ECOLIBifunctionalligase/repressorBirAOS=Escherichiacoli(strainK12)GN=birAPE=1SV=1	sp|P06709|BIRA_ECOLIBifunctionalligase/repressorBirAOS=Escherichiacoli(strainK12)GN=birAPE=1SV=1	MULTI-MSMS	37_J5_pd	BirADtBio100_ClinkerPD	379.736	2	379.73	757.445	35103.6	18.014	0.0068404	0.095742	3.6356e-05	18.11	0.0068768	379.73	11.822	1.0264	11.822	11.256	12.282	-9.5367e-07					69	46	2	0	0	0	0.01	2	833
LIIGDKEIFGISR	13	Unmodified	_LIIGDKEIFGISR_					0	0	0	0	1	sp|P06709|BIRA_ECOLIBifunctionalligase/repressorBirAOS=Escherichiacoli(strainK12)GN=birAPE=1SV=1	sp|P06709|BIRA_ECOLIBifunctionalligase/repressorBirAOS=Escherichiacoli(strainK12)GN=birAPE=1SV=1	sp|P06709|BIRA_ECOLIBifunctionalligase/repressorBirAOS=Escherichiacoli(strainK12)GN=birAPE=1SV=1	MULTI-MSMS	37_J5_pd	BirADtBio100_ClinkerPD	730.94	2	730.927	1459.84	25631.4	18.011	0.013165	-0.70648	-0.00051638	17.305	0.012649	730.927	41.425	0.43596	41.425	41.185	41.621	3.8147e-06					54	30	2	0	0	0	0.01	1	3837
LIIGDKEIFGISR	13	Unmodified	_LIIGDKEIFGISR_					0	0	0	0	1	sp|P06709|BIRA_ECOLIBifunctionalligase/repressorBirAOS=Escherichiacoli(strainK12)GN=birAPE=1SV=1	sp|P06709|BIRA_ECOLIBifunctionalligase/repressorBirAOS=Escherichiacoli(strainK12)GN=birAPE=1SV=1	sp|P06709|BIRA_ECOLIBifunctionalligase/repressorBirAOS=Escherichiacoli(strainK12)GN=birAPE=1SV=1	MULTI-MSMS	37_J5_pd	BirADtBio100_ClinkerPD	487.628	3	487.621	1459.84	30120.8	18.017	0.0087856	-1.3838	-0.00067477	16.633	0.0081108	487.62	41.392	0.60594	41.392	41.105	41.711	0					137	44	4	0	0	0	0.01	1	3847
QILGQLDGGSVAVLPVIDSTNQYLLDR	27	Unmodified	_QILGQLDGGSVAVLPVIDSTNQYLLDR_					0	0	0	0	0	sp|P06709|BIRA_ECOLIBifunctionalligase/repressorBirAOS=Escherichiacoli(strainK12)GN=birAPE=1SV=1	sp|P06709|BIRA_ECOLIBifunctionalligase/repressorBirAOS=Escherichiacoli(strainK12)GN=birAPE=1SV=1	sp|P06709|BIRA_ECOLIBifunctionalligase/repressorBirAOS=Escherichiacoli(strainK12)GN=birAPE=1SV=1	MULTI-MSMS	37_J5_pd	BirADtBio100_ClinkerPD	962.539	3	962.185	2883.53	21266.8	18.016	0.017335	1.8969	0.0018251	19.913	0.01916	962.522	56.74	0.65744	56.74	56.544	57.201	0					184	44	7	0	0	0	0.01	1	5292
QILGQLDGGSVAVLPVIDSTNQYLLDR	27	Unmodified	_QILGQLDGGSVAVLPVIDSTNQYLLDR_					0	0	0	0	0	sp|P06709|BIRA_ECOLIBifunctionalligase/repressorBirAOS=Escherichiacoli(strainK12)GN=birAPE=1SV=1	sp|P06709|BIRA_ECOLIBifunctionalligase/repressorBirAOS=Escherichiacoli(strainK12)GN=birAPE=1SV=1	sp|P06709|BIRA_ECOLIBifunctionalligase/repressorBirAOS=Escherichiacoli(strainK12)GN=birAPE=1SV=1	MULTI-MSMS	37_J5_pd	BirADtBio100_ClinkerPD	1443.31	2	1442.77	2883.53	16187	18.016	0.025992	1.9209	0.0027714	19.937	0.028764	1443.28	56.74	0.39142	56.74	56.581	56.973	0					95	23	5	0	0	0	0.01	1	5303
QILGQLDGGSVAVLPVIDSTNQYLLDR	27	Unmodified	_QILGQLDGGSVAVLPVIDSTNQYLLDR_					0	0	0	0	0	sp|P06709|BIRA_ECOLIBifunctionalligase/repressorBirAOS=Escherichiacoli(strainK12)GN=birAPE=1SV=1	sp|P06709|BIRA_ECOLIBifunctionalligase/repressorBirAOS=Escherichiacoli(strainK12)GN=birAPE=1SV=1	sp|P06709|BIRA_ECOLIBifunctionalligase/repressorBirAOS=Escherichiacoli(strainK12)GN=birAPE=1SV=1	MULTI-SECPEP	37_J5_pd	BirADtBio100_ClinkerPD	962.534	3	962.185	2883.53	21670.3	18.015	0.017334	1.4614	0.0014061	19.477	0.01874	962.52	61.341	0.30029	61.341	61.182	61.482	0					46	19	4	0	0	0	0.01	1	5742
RVEESVVNQGWITLQEAGINLDR	23	Unmodified	_RVEESVVNQGWITLQEAGINLDR_					0	0	0	0	1	sp|P06709|BIRA_ECOLIBifunctionalligase/repressorBirAOS=Escherichiacoli(strainK12)GN=birAPE=1SV=1	sp|P06709|BIRA_ECOLIBifunctionalligase/repressorBirAOS=Escherichiacoli(strainK12)GN=birAPE=1SV=1	sp|P06709|BIRA_ECOLIBifunctionalligase/repressorBirAOS=Escherichiacoli(strainK12)GN=birAPE=1SV=1	MULTI-MSMS	37_J5_pd	BirADtBio100_ClinkerPD	876.474	3	876.124	2625.35	22156.5	18.017	0.015785	-0.044951	-3.9383e-05	17.972	0.015745	876.459	49.485	0.68873	49.485	49.196	49.884	0					170	46	5	0	0	0	0.01	1	4592
SGDACIAEYQQAGR	14	Unmodified	_SGDACIAEYQQAGR_					0	0	0	0	0	sp|P06709|BIRA_ECOLIBifunctionalligase/repressorBirAOS=Escherichiacoli(strainK12)GN=birAPE=1SV=1	sp|P06709|BIRA_ECOLIBifunctionalligase/repressorBirAOS=Escherichiacoli(strainK12)GN=birAPE=1SV=1	sp|P06709|BIRA_ECOLIBifunctionalligase/repressorBirAOS=Escherichiacoli(strainK12)GN=birAPE=1SV=1	MULTI-MSMS	37_J5_pd	BirADtBio100_ClinkerPD	763.351	2	763.339	1524.66	24239.2	18.012	0.013749	-1.9281	-0.0014718	16.084	0.012278	763.337	22.981	0.52562	22.981	22.722	23.248	0					58	33	2	0	0	0	0.01	1	2092
VEESVVNQGWITLQEAGINLDR	22	Unmodified	_VEESVVNQGWITLQEAGINLDR_					0	0	0	0	0	sp|P06709|BIRA_ECOLIBifunctionalligase/repressorBirAOS=Escherichiacoli(strainK12)GN=birAPE=1SV=1	sp|P06709|BIRA_ECOLIBifunctionalligase/repressorBirAOS=Escherichiacoli(strainK12)GN=birAPE=1SV=1	sp|P06709|BIRA_ECOLIBifunctionalligase/repressorBirAOS=Escherichiacoli(strainK12)GN=birAPE=1SV=1	MULTI-MSMS	37_J5_pd	BirADtBio100_ClinkerPD	824.441	3	824.091	2469.25	23219.7	18.016	0.014847	0.54649	0.00045036	18.563	0.015297	824.425	53.514	0.70022	53.514	53.231	53.931	0					198	52	5	0	0	0	0.01	1	4980
VEESVVNQGWITLQEAGINLDR	22	Unmodified	_VEESVVNQGWITLQEAGINLDR_					0	0	0	0	0	sp|P06709|BIRA_ECOLIBifunctionalligase/repressorBirAOS=Escherichiacoli(strainK12)GN=birAPE=1SV=1	sp|P06709|BIRA_ECOLIBifunctionalligase/repressorBirAOS=Escherichiacoli(strainK12)GN=birAPE=1SV=1	sp|P06709|BIRA_ECOLIBifunctionalligase/repressorBirAOS=Escherichiacoli(strainK12)GN=birAPE=1SV=1	MULTI-MSMS	37_J5_pd	BirADtBio100_ClinkerPD	1236.16	2	1235.63	2469.25	17902.4	18.017	0.022262	1.1547	0.0014268	19.172	0.023689	1236.14	53.541	0.61476	53.541	53.271	53.886	0					163	45	5	0	0	0	0.01	1	4986
VRVKWPNDLYLQDR	14	Unmodified	_VRVKWPNDLYLQDR_					0	0	0	0	2	sp|P06709|BIRA_ECOLIBifunctionalligase/repressorBirAOS=Escherichiacoli(strainK12)GN=birAPE=1SV=1	sp|P06709|BIRA_ECOLIBifunctionalligase/repressorBirAOS=Escherichiacoli(strainK12)GN=birAPE=1SV=1	sp|P06709|BIRA_ECOLIBifunctionalligase/repressorBirAOS=Escherichiacoli(strainK12)GN=birAPE=1SV=1	MSMS	37_J5_pd	BirADtBio100_ClinkerPD	601.326	3	601.328	1800.96	NaN	NaN	NaN	NaN	NaN	NaN	NaN	NaN	25.116	1	25.116	24.616	25.616	0								0	0	0	0.01	1	2308
WPNDLYLQDR	10	Unmodified	_WPNDLYLQDR_					0	0	0	0	0	sp|P06709|BIRA_ECOLIBifunctionalligase/repressorBirAOS=Escherichiacoli(strainK12)GN=birAPE=1SV=1	sp|P06709|BIRA_ECOLIBifunctionalligase/repressorBirAOS=Escherichiacoli(strainK12)GN=birAPE=1SV=1	sp|P06709|BIRA_ECOLIBifunctionalligase/repressorBirAOS=Escherichiacoli(strainK12)GN=birAPE=1SV=1	MULTI-MSMS	37_J5_pd	BirADtBio100_ClinkerPD	660.835	2	660.323	1318.63	27040.6	18.012	0.011894	-0.30871	-0.00020385	17.703	0.01169	660.322	37.989	0.33211	37.989	37.817	38.149	0					42	22	2	0	0	0	0.01	1	3523
[truncated: 15 more columns]

## Sheet: BirA-DtBio_DtDigest Evidence
Sequence	Length	Modifications	Modified sequence	Dt->Lys Probabilities	Oxidation (M) Probabilities	Dt->Lys Score Diffs	Oxidation (M) Score Diffs	Acetyl (Protein N-term)	Dt->Lys	Dt->N-term	Oxidation (M)	Missed cleavages	Proteins	Leading proteins	Leading razor protein	Type	Raw file	Experiment	MS/MS m/z	Charge	m/z	Mass	Resolution	Uncalibrated - Calibrated m/z [ppm]	Uncalibrated - Calibrated m/z [Da]	Mass error [ppm]	Mass error [Da]	Uncalibrated mass error [ppm]	Uncalibrated mass error [Da]	Max intensity m/z 0	Retention time	Retention length	Calibrated retention time	Calibrated retention time start	Calibrated retention time finish	Retention time calibration	Match time difference	Match m/z difference	Match q-value	Match score	Number of data points	Number of scans	Number of isotopic peaks	PIF	Fraction of total spectrum	Base peak fraction	PEP	MS/MS count	MS/MS scan number
KLAGILVELTGKTGDAAQIVIGAGINMAMR	30	2 Oxidation (M)	_KLAGILVELTGKTGDAAQIVIGAGINM(ox)AM(ox)R_		KLAGILVELTGKTGDAAQIVIGAGINM(1)AM(1)R		KLAGILVELTGKTGDAAQIVIGAGINM(43.07)AM(43.07)R	0	0	0	2	2	sp|P06709|BIRA_ECOLIBifunctionalligase/repressorBirAOS=Escherichiacoli(strainK12)GN=birAPE=1SV=1	sp|P06709|BIRA_ECOLIBifunctionalligase/repressorBirAOS=Escherichiacoli(strainK12)GN=birAPE=1SV=1	sp|P06709|BIRA_ECOLIBifunctionalligase/repressorBirAOS=Escherichiacoli(strainK12)GN=birAPE=1SV=1	MULTI-MSMS	12_J3_	BirADtBio100_DtDigest	762.174	4	761.672	3042.66	24683.1	1.6759	0.0012765	0.15665	0.00011932	1.8325	0.0013958	761.673	101	1.09	101	100.5	101.59	0					103	33	5	0	0	0	0.01	1	12358
TGDAAQIVIGAGINMAMR	18	2 Oxidation (M)	_TGDAAQIVIGAGINM(ox)AM(ox)R_		TGDAAQIVIGAGINM(1)AM(1)R		TGDAAQIVIGAGINM(180.09)AM(180.09)R	0	0	0	2	0	sp|P06709|BIRA_ECOLIBifunctionalligase/repressorBirAOS=Escherichiacoli(strainK12)GN=birAPE=1SV=1	sp|P06709|BIRA_ECOLIBifunctionalligase/repressorBirAOS=Escherichiacoli(strainK12)GN=birAPE=1SV=1	sp|P06709|BIRA_ECOLIBifunctionalligase/repressorBirAOS=Escherichiacoli(strainK12)GN=birAPE=1SV=1	MULTI-MSMS	12_J3_	BirADtBio100_DtDigest	911.453	2	910.953	1819.89	21680.8	2.0113	0.0018322	0.36879	0.00033595	2.3801	0.0021681	910.954	68.153	4.2498	68.153	66.263	70.513	0					411	91	6	0	0	0	0.01	5	7569
TGDAAQIVIGAGINMAMR	18	2 Oxidation (M)	_TGDAAQIVIGAGINM(ox)AM(ox)R_		TGDAAQIVIGAGINM(1)AM(1)R		TGDAAQIVIGAGINM(165.89)AM(165.89)R	0	0	0	2	0	sp|P06709|BIRA_ECOLIBifunctionalligase/repressorBirAOS=Escherichiacoli(strainK12)GN=birAPE=1SV=1	sp|P06709|BIRA_ECOLIBifunctionalligase/repressorBirAOS=Escherichiacoli(strainK12)GN=birAPE=1SV=1	sp|P06709|BIRA_ECOLIBifunctionalligase/repressorBirAOS=Escherichiacoli(strainK12)GN=birAPE=1SV=1	MULTI-MSMS	12_J3_	BirADtBio100_DtDigest	607.972	3	607.638	1819.89	26920.6	0.90802	0.00055175	0.046022	2.7965e-05	0.95404	0.00057971	607.639	68.145	4.4703	68.145	66.263	70.734	0					450	98	7	0	0	0	0.01	4	7624
TGDAAQIVIGAGINMAMR	18	2 Oxidation (M)	_TGDAAQIVIGAGINM(ox)AM(ox)R_		TGDAAQIVIGAGINM(1)AM(1)R		TGDAAQIVIGAGINM(54.07)AM(54.07)R	0	0	0	2	0	sp|P06709|BIRA_ECOLIBifunctionalligase/repressorBirAOS=Escherichiacoli(strainK12)GN=birAPE=1SV=1	sp|P06709|BIRA_ECOLIBifunctionalligase/repressorBirAOS=Escherichiacoli(strainK12)GN=birAPE=1SV=1	sp|P06709|BIRA_ECOLIBifunctionalligase/repressorBirAOS=Escherichiacoli(strainK12)GN=birAPE=1SV=1	MULTI-MSMS	12_J3_	BirADtBio100_DtDigest	607.639	3	607.638	1819.89	26920.5	0.9902	0.00060168	-3.2937	-0.0020014	-2.3035	-0.0013997	607.971	72.732	1.9421	72.732	71.864	73.806	0					76	37	3	0	0	0	0.01	1	8443
TGDAAQIVIGAGINMAMR	18	2 Oxidation (M)	_TGDAAQIVIGAGINM(ox)AM(ox)R_		TGDAAQIVIGAGINM(1)AM(1)R		TGDAAQIVIGAGINM(117.53)AM(117.53)R	0	0	0	2	0	sp|P06709|BIRA_ECOLIBifunctionalligase/repressorBirAOS=Escherichiacoli(strainK12)GN=birAPE=1SV=1	sp|P06709|BIRA_ECOLIBifunctionalligase/repressorBirAOS=Escherichiacoli(strainK12)GN=birAPE=1SV=1	sp|P06709|BIRA_ECOLIBifunctionalligase/repressorBirAOS=Escherichiacoli(strainK12)GN=birAPE=1SV=1	MULTI-MSMS	12_J3_	BirADtBio100_DtDigest	607.639	3	607.638	1819.89	28378.2	1.1185	0.00067963	-0.64265	-0.0003905	0.47583	0.00028913	607.638	78.088	4.0651	78.088	76.214	80.279	7.6294e-06					166	88	3	0	0	0	0.01	3	9098
TGDAAQIVIGAGINMAMR	18	2 Oxidation (M)	_TGDAAQIVIGAGINM(ox)AM(ox)R_		TGDAAQIVIGAGINM(1)AM(1)R		TGDAAQIVIGAGINM(59.15)AM(59.15)R	0	0	0	2	0	sp|P06709|BIRA_ECOLIBifunctionalligase/repressorBirAOS=Escherichiacoli(strainK12)GN=birAPE=1SV=1	sp|P06709|BIRA_ECOLIBifunctionalligase/repressorBirAOS=Escherichiacoli(strainK12)GN=birAPE=1SV=1	sp|P06709|BIRA_ECOLIBifunctionalligase/repressorBirAOS=Escherichiacoli(strainK12)GN=birAPE=1SV=1	MULTI-MSMS	12_J3_	BirADtBio100_DtDigest	607.638	3	607.638	1819.89	28787.3	1.2075	0.00073375	1.3695	0.00083214	2.577	0.0015659	607.64	80.854	1.1181	80.854	80.068	81.186	0					29	23	2	0	0	0	0.01	1	9609
TGDAAQIVIGAGINMAMR	18	2 Oxidation (M)	_TGDAAQIVIGAGINM(ox)AM(ox)R_		TGDAAQIVIGAGINM(1)AM(1)R		TGDAAQIVIGAGINM(105.39)AM(105.39)R	0	0	0	2	0	sp|P06709|BIRA_ECOLIBifunctionalligase/repressorBirAOS=Escherichiacoli(strainK12)GN=birAPE=1SV=1	sp|P06709|BIRA_ECOLIBifunctionalligase/repressorBirAOS=Escherichiacoli(strainK12)GN=birAPE=1SV=1	sp|P06709|BIRA_ECOLIBifunctionalligase/repressorBirAOS=Escherichiacoli(strainK12)GN=birAPE=1SV=1	MULTI-MSMS	12_J3_	BirADtBio100_DtDigest	607.641	3	607.638	1819.89	27672.7	1.2735	0.00077385	-0.95475	-0.00058014	0.31879	0.00019371	607.638	82.455	3.9105	82.455	80.764	84.674	0					159	102	3	0	0	0	0.01	2	9758
TGDAAQIVIGAGINMAMR	18	2 Oxidation (M)	_TGDAAQIVIGAGINM(ox)AM(ox)R_		TGDAAQIVIGAGINM(1)AM(1)R		TGDAAQIVIGAGINM(164.68)AM(164.68)R	0	0	0	2	0	sp|P06709|BIRA_ECOLIBifunctionalligase/repressorBirAOS=Escherichiacoli(strainK12)GN=birAPE=1SV=1	sp|P06709|BIRA_ECOLIBifunctionalligase/repressorBirAOS=Escherichiacoli(strainK12)GN=birAPE=1SV=1	sp|P06709|BIRA_ECOLIBifunctionalligase/repressorBirAOS=Escherichiacoli(strainK12)GN=birAPE=1SV=1	MULTI-MSMS	12_J3_	BirADtBio100_DtDigest	910.957	2	910.953	1819.89	23604.6	2.3798	0.0021678	-1.0319	-0.00094006	1.3478	0.0012278	911.452	82.631	1.7959	82.631	81.815	83.611	0					89	41	3	0	0	0	0.01	2	9860
TGDAAQIVIGAGINMAMR	18	2 Oxidation (M)	_TGDAAQIVIGAGINM(ox)AM(ox)R_		TGDAAQIVIGAGINM(1)AM(1)R		TGDAAQIVIGAGINM(70.41)AM(70.41)R	0	0	0	2	0	sp|P06709|BIRA_ECOLIBifunctionalligase/repressorBirAOS=Escherichiacoli(strainK12)GN=birAPE=1SV=1	sp|P06709|BIRA_ECOLIBifunctionalligase/repressorBirAOS=Escherichiacoli(strainK12)GN=birAPE=1SV=1	sp|P06709|BIRA_ECOLIBifunctionalligase/repressorBirAOS=Escherichiacoli(strainK12)GN=birAPE=1SV=1	MSMS	12_J3_	BirADtBio100_DtDigest	607.638	3	607.638	1819.89	NaN	NaN	NaN	NaN	NaN	NaN	NaN	NaN	108.73	1	108.73	108.23	109.23	0								0	0	0	0.01	1	13280
TGDAAQIVIGAGINMAMRR	19	2 Oxidation (M)	_TGDAAQIVIGAGINM(ox)AM(ox)RR_		TGDAAQIVIGAGINM(1)AM(1)RR		TGDAAQIVIGAGINM(86.38)AM(86.38)RR	0	0	0	2	1	sp|P06709|BIRA_ECOLIBifunctionalligase/repressorBirAOS=Escherichiacoli(strainK12)GN=birAPE=1SV=1	sp|P06709|BIRA_ECOLIBifunctionalligase/repressorBirAOS=Escherichiacoli(strainK12)GN=birAPE=1SV=1	sp|P06709|BIRA_ECOLIBifunctionalligase/repressorBirAOS=Escherichiacoli(strainK12)GN=birAPE=1SV=1	MULTI-MSMS	12_J3_	BirADtBio100_DtDigest	660.007	3	659.672	1975.99	25894.5	0.9338	0.000616	-0.61425	-0.0004052	0.31955	0.0002108	660.006	72.419	2.7614	72.419	70.92	73.681	7.6294e-06					243	55	6	0	0	0	0.01	2	8385
KLAGILVELTGK	12	Dt->Lys	_K(dt)LAGILVELTGK_	K(1)LAGILVELTGK		K(137.01)LAGILVELTGK(-137.01)		0	1	0	0	1	sp|P06709|BIRA_ECOLIBifunctionalligase/repressorBirAOS=Escherichiacoli(strainK12)GN=birAPE=1SV=1	sp|P06709|BIRA_ECOLIBifunctionalligase/repressorBirAOS=Escherichiacoli(strainK12)GN=birAPE=1SV=1	sp|P06709|BIRA_ECOLIBifunctionalligase/repressorBirAOS=Escherichiacoli(strainK12)GN=birAPE=1SV=1	MULTI-MSMS	12_J3_	BirADtBio100_DtDigest	634.391	2	634.39	1266.77	27449.8	1.1694	0.00074184	1.0951	0.00069471	2.2645	0.0014366	634.391	102.37	0.6693	102.37	102.09	102.76	0					32	11	4	0	0	0	0.01	1	12500
GIDKQGALLLEQDGIIKPWMGGEISLR	27	Oxidation (M)	_GIDKQGALLLEQDGIIKPWM(ox)GGEISLR_		GIDKQGALLLEQDGIIKPWM(1)GGEISLR		GIDKQGALLLEQDGIIKPWM(117.01)GGEISLR	0	0	0	1	2	sp|P06709|BIRA_ECOLIBifunctionalligase/repressorBirAOS=Escherichiacoli(strainK12)GN=birAPE=1SV=1	sp|P06709|BIRA_ECOLIBifunctionalligase/repressorBirAOS=Escherichiacoli(strainK12)GN=birAPE=1SV=1	sp|P06709|BIRA_ECOLIBifunctionalligase/repressorBirAOS=Escherichiacoli(strainK12)GN=birAPE=1SV=1	MULTI-MSMS	12_J3_	BirADtBio100_DtDigest	739.402	4	739.151	2952.57	24766.1	1.7794	0.0013153	0.48717	0.00036009	2.2666	0.0016754	739.402	93.734	3.002	93.734	92.789	95.791	0					461	88	8	0	0	0	0.01	3	11345
GIDKQGALLLEQDGIIKPWMGGEISLR	27	Oxidation (M)	_GIDKQGALLLEQDGIIKPWM(ox)GGEISLR_		GIDKQGALLLEQDGIIKPWM(1)GGEISLR		GIDKQGALLLEQDGIIKPWM(131.75)GGEISLR	0	0	0	1	2	sp|P06709|BIRA_ECOLIBifunctionalligase/repressorBirAOS=Escherichiacoli(strainK12)GN=birAPE=1SV=1	sp|P06709|BIRA_ECOLIBifunctionalligase/repressorBirAOS=Escherichiacoli(strainK12)GN=birAPE=1SV=1	sp|P06709|BIRA_ECOLIBifunctionalligase/repressorBirAOS=Escherichiacoli(strainK12)GN=birAPE=1SV=1	MULTI-MSMS	12_J3_	BirADtBio100_DtDigest	985.867	3	985.199	2952.57	21148.8	2.9084	0.0028654	0.36583	0.00036042	3.2742	0.0032258	985.534	93.873	1.9132	93.873	93.034	94.947	-7.6294e-06					295	58	7	0	0	0	0.01	2	11346
GIDKQGALLLEQDGIIKPWMGGEISLR	27	Oxidation (M)	_GIDKQGALLLEQDGIIKPWM(ox)GGEISLR_		GIDKQGALLLEQDGIIKPWM(1)GGEISLR		GIDKQGALLLEQDGIIKPWM(61.9)GGEISLR	0	0	0	1	2	sp|P06709|BIRA_ECOLIBifunctionalligase/repressorBirAOS=Escherichiacoli(strainK12)GN=birAPE=1SV=1	sp|P06709|BIRA_ECOLIBifunctionalligase/repressorBirAOS=Escherichiacoli(strainK12)GN=birAPE=1SV=1	sp|P06709|BIRA_ECOLIBifunctionalligase/repressorBirAOS=Escherichiacoli(strainK12)GN=birAPE=1SV=1	MULTI-MSMS	12_J3_	BirADtBio100_DtDigest	739.403	4	739.151	2952.57	25267.8	1.5485	0.0011445	-0.11995	-8.8662e-05	1.4285	0.0010559	739.401	97.478	3.3211	97.478	96.068	99.389	7.6294e-06					382	101	6	0	0	0	0.01	3	11739
LEQGPAAAIGLSLVIGIVMAEVLR	24	Oxidation (M)	_LEQGPAAAIGLSLVIGIVM(ox)AEVLR_		LEQGPAAAIGLSLVIGIVM(1)AEVLR		LEQGPAAAIGLSLVIGIVM(178.19)AEVLR	0	0	0	1	0	sp|P06709|BIRA_ECOLIBifunctionalligase/repressorBirAOS=Escherichiacoli(strainK12)GN=birAPE=1SV=1	sp|P06709|BIRA_ECOLIBifunctionalligase/repressorBirAOS=Escherichiacoli(strainK12)GN=birAPE=1SV=1	sp|P06709|BIRA_ECOLIBifunctionalligase/repressorBirAOS=Escherichiacoli(strainK12)GN=birAPE=1SV=1	MULTI-MSMS	12_J3_	BirADtBio100_DtDigest	813.138	3	812.801	2435.38	23614.1	2.3248	0.0018896	-0.18222	-0.0001481	2.1426	0.0017415	813.136	110.32	0.50147	110.32	110.11	110.61	7.6294e-06					153	33	7	0	0	0	0.01	1	13437
LEQGPAAAIGLSLVIGIVMAEVLR	24	Oxidation (M)	_LEQGPAAAIGLSLVIGIVM(ox)AEVLR_		LEQGPAAAIGLSLVIGIVM(1)AEVLR		LEQGPAAAIGLSLVIGIVM(121.26)AEVLR	0	0	0	1	0	sp|P06709|BIRA_ECOLIBifunctionalligase/repressorBirAOS=Escherichiacoli(strainK12)GN=birAPE=1SV=1	sp|P06709|BIRA_ECOLIBifunctionalligase/repressorBirAOS=Escherichiacoli(strainK12)GN=birAPE=1SV=1	sp|P06709|BIRA_ECOLIBifunctionalligase/repressorBirAOS=Escherichiacoli(strainK12)GN=birAPE=1SV=1	MULTI-MSMS	12_J3_	BirADtBio100_DtDigest	1219.2	2	1218.7	2435.38	18262.9	4.1881	0.005104	-0.53669	-0.00065407	3.6514	0.00445	1219.2	110.32	0.39371	110.32	110.14	110.53	0					97	24	6	0	0	0	0.01	1	13441
LIALLANGEFHSGEQLGETLGMSR	24	Oxidation (M)	_LIALLANGEFHSGEQLGETLGM(ox)SR_		LIALLANGEFHSGEQLGETLGM(1)SR		LIALLANGEFHSGEQLGETLGM(88.57)SR	0	0	0	1	0	sp|P06709|BIRA_ECOLIBifunctionalligase/repressorBirAOS=Escherichiacoli(strainK12)GN=birAPE=1SV=1	sp|P06709|BIRA_ECOLIBifunctionalligase/repressorBirAOS=Escherichiacoli(strainK12)GN=birAPE=1SV=1	sp|P06709|BIRA_ECOLIBifunctionalligase/repressorBirAOS=Escherichiacoli(strainK12)GN=birAPE=1SV=1	MULTI-MSMS	12_J3_	BirADtBio100_DtDigest	640.829	4	640.577	2558.28	26168.4	1.3603	0.00087137	-0.42073	-0.00026951	0.93956	0.00060186	640.828	89.155	2.6219	89.154	87.874	90.496	-7.6294e-06					341	95	5	0	0	0	0.01	2	10772
LIALLANGEFHSGEQLGETLGMSR	24	Oxidation (M)	_LIALLANGEFHSGEQLGETLGM(ox)SR_		LIALLANGEFHSGEQLGETLGM(1)SR		LIALLANGEFHSGEQLGETLGM(56.25)SR	0	0	0	1	0	sp|P06709|BIRA_ECOLIBifunctionalligase/repressorBirAOS=Escherichiacoli(strainK12)GN=birAPE=1SV=1	sp|P06709|BIRA_ECOLIBifunctionalligase/repressorBirAOS=Escherichiacoli(strainK12)GN=birAPE=1SV=1	sp|P06709|BIRA_ECOLIBifunctionalligase/repressorBirAOS=Escherichiacoli(strainK12)GN=birAPE=1SV=1	MULTI-MSMS	12_J3_	BirADtBio100_DtDigest	854.102	3	853.767	2558.28	22832.9	2.1067	0.0017986	-0.32934	-0.00028118	1.7773	0.0015174	854.101	101.1	1.0763	101.1	100.58	101.66	0					98	35	4	0	0	0	0.01	1	12337
LIALLANGEFHSGEQLGETLGMSR	24	Oxidation (M)	_LIALLANGEFHSGEQLGETLGM(ox)SR_		LIALLANGEFHSGEQLGETLGM(1)SR		LIALLANGEFHSGEQLGETLGM(112.53)SR	0	0	0	1	0	sp|P06709|BIRA_ECOLIBifunctionalligase/repressorBirAOS=Escherichiacoli(strainK12)GN=birAPE=1SV=1	sp|P06709|BIRA_ECOLIBifunctionalligase/repressorBirAOS=Escherichiacoli(strainK12)GN=birAPE=1SV=1	sp|P06709|BIRA_ECOLIBifunctionalligase/repressorBirAOS=Escherichiacoli(strainK12)GN=birAPE=1SV=1	MULTI-MSMS	12_J3_	BirADtBio100_DtDigest	854.436	3	853.767	2558.28	22453.8	2.3461	0.002003	0.33703	0.00028774	2.6831	0.0022908	854.103	106.05	1.5352	106.05	105.86	107.4	0					235	66	4	0	0	0	0.01	1	13086
LIALLANGEFHSGEQLGETLGMSR	24	Oxidation (M)	_LIALLANGEFHSGEQLGETLGM(ox)SR_		LIALLANGEFHSGEQLGETLGM(1)SR		LIALLANGEFHSGEQLGETLGM(155.08)SR	0	0	0	1	0	sp|P06709|BIRA_ECOLIBifunctionalligase/repressorBirAOS=Escherichiacoli(strainK12)GN=birAPE=1SV=1	sp|P06709|BIRA_ECOLIBifunctionalligase/repressorBirAOS=Escherichiacoli(strainK12)GN=birAPE=1SV=1	sp|P06709|BIRA_ECOLIBifunctionalligase/repressorBirAOS=Escherichiacoli(strainK12)GN=birAPE=1SV=1	MULTI-MSMS	12_J3_	BirADtBio100_DtDigest	854.105	3	853.767	2558.28	22755.8	2.4182	0.0020646	0.26888	0.00022956	2.6871	0.0022942	854.102	108.07	0.61111	108.07	107.89	108.5	0					43	30	2	0	0	0	0.01	1	13205
LIALLANGEFHSGEQLGETLGMSR	24	Oxidation (M)	_LIALLANGEFHSGEQLGETLGM(ox)SR_		LIALLANGEFHSGEQLGETLGM(1)SR		LIALLANGEFHSGEQLGETLGM(110.34)SR	0	0	0	1	0	sp|P06709|BIRA_ECOLIBifunctionalligase/repressorBirAOS=Escherichiacoli(strainK12)GN=birAPE=1SV=1	sp|P06709|BIRA_ECOLIBifunctionalligase/repressorBirAOS=Escherichiacoli(strainK12)GN=birAPE=1SV=1	sp|P06709|BIRA_ECOLIBifunctionalligase/repressorBirAOS=Escherichiacoli(strainK12)GN=birAPE=1SV=1	MULTI-MSMS	12_J3_	BirADtBio100_DtDigest	854.105	3	853.767	2558.28	22629.1	2.459	0.0020994	-0.55663	-0.00047523	1.9023	0.0016242	854.101	108.81	1.7836	108.81	108.37	110.15	7.6294e-06					272	94	4	0	0	0	0.01	2	13294
LIALLANGEFHSGEQLGETLGMSR	24	Oxidation (M)	_LIALLANGEFHSGEQLGETLGM(ox)SR_		LIALLANGEFHSGEQLGETLGM(1)SR		LIALLANGEFHSGEQLGETLGM(103.31)SR	0	0	0	1	0	sp|P06709|BIRA_ECOLIBifunctionalligase/repressorBirAOS=Escherichiacoli(strainK12)GN=birAPE=1SV=1	sp|P06709|BIRA_ECOLIBifunctionalligase/repressorBirAOS=Escherichiacoli(strainK12)GN=birAPE=1SV=1	sp|P06709|BIRA_ECOLIBifunctionalligase/repressorBirAOS=Escherichiacoli(strainK12)GN=birAPE=1SV=1	MULTI-MSMS	12_J3_	BirADtBio100_DtDigest	854.104	3	853.767	2558.28	23594.1	2.5694	0.0021937	-0.66724	-0.00056966	1.9021	0.001624	854.101	111.68	0.4246	111.68	111.42	111.85	-7.6294e-06					45	33	2	0	0	0	0.01	1	13571
LIALLANGEFHSGEQLGETLGMSR	24	Oxidation (M)	_LIALLANGEFHSGEQLGETLGM(ox)SR_		LIALLANGEFHSGEQLGETLGM(1)SR		LIALLANGEFHSGEQLGETLGM(83.07)SR	0	0	0	1	0	sp|P06709|BIRA_ECOLIBifunctionalligase/repressorBirAOS=Escherichiacoli(strainK12)GN=birAPE=1SV=1	sp|P06709|BIRA_ECOLIBifunctionalligase/repressorBirAOS=Escherichiacoli(strainK12)GN=birAPE=1SV=1	sp|P06709|BIRA_ECOLIBifunctionalligase/repressorBirAOS=Escherichiacoli(strainK12)GN=birAPE=1SV=1	MULTI-MSMS	12_J3_	BirADtBio100_DtDigest	854.1	3	853.767	2558.28	24087.9	2.6489	0.0022615	-1.8459	-0.001576	0.80296	0.00068554	854.1	113.33	1.1452	113.33	113.09	114.23	0					147	93	3	0	0	0	0.01	1	13716
MKDNTVPLK	9	Oxidation (M)	_M(ox)KDNTVPLK_		M(1)KDNTVPLK		M(49.54)KDNTVPLK	0	0	0	1	1	sp|P06709|BIRA_ECOLIBifunctionalligase/repressorBirAOS=Escherichiacoli(strainK12)GN=birAPE=1SV=1	sp|P06709|BIRA_ECOLIBifunctionalligase/repressorBirAOS=Escherichiacoli(strainK12)GN=birAPE=1SV=1	sp|P06709|BIRA_ECOLIBifunctionalligase/repressorBirAOS=Escherichiacoli(strainK12)GN=birAPE=1SV=1	MULTI-MSMS	12_J3_	BirADtBio100_DtDigest	531.287	2	531.287	1060.56	29169.5	0.79338	0.00042151	-0.074244	-3.9445e-05	0.71914	0.00038207	531.287	38.832	11.92	38.832	31.476	43.396	0					894	332	4	0	0	0	0.01	12	3156
MKDNTVPLK	9	Oxidation (M)	_M(ox)KDNTVPLK_		M(1)KDNTVPLK		M(50.04)KDNTVPLK	0	0	0	1	1	sp|P06709|BIRA_ECOLIBifunctionalligase/repressorBirAOS=Escherichiacoli(strainK12)GN=birAPE=1SV=1	sp|P06709|BIRA_ECOLIBifunctionalligase/repressorBirAOS=Escherichiacoli(strainK12)GN=birAPE=1SV=1	sp|P06709|BIRA_ECOLIBifunctionalligase/repressorBirAOS=Escherichiacoli(strainK12)GN=birAPE=1SV=1	MULTI-MSMS	12_J3_	BirADtBio100_DtDigest	354.527	3	354.527	1060.56	35298.3	1.78	0.00063107	-0.0075151	-2.6643e-06	1.7725	0.00062841	354.527	38.358	14.148	38.358	29.512	43.66	0					1114	405	4	0	0	0	0.01	10	3325
MKDNTVPLK	9	Oxidation (M)	_M(ox)KDNTVPLK_		M(1)KDNTVPLK		M(53.49)KDNTVPLK	0	0	0	1	1	sp|P06709|BIRA_ECOLIBifunctionalligase/repressorBirAOS=Escherichiacoli(strainK12)GN=birAPE=1SV=1	sp|P06709|BIRA_ECOLIBifunctionalligase/repressorBirAOS=Escherichiacoli(strainK12)GN=birAPE=1SV=1	sp|P06709|BIRA_ECOLIBifunctionalligase/repressorBirAOS=Escherichiacoli(strainK12)GN=birAPE=1SV=1	MULTI-MSMS	12_J3_	BirADtBio100_DtDigest	531.287	2	531.287	1060.56	29404.8	0.91732	0.00048736	0.56583	0.00030062	1.4832	0.00078798	531.287	45.863	2.8927	45.863	43.396	46.289	0					160	100	2	0	0	0	0.01	2	4615
MKDNTVPLK	9	Oxidation (M)	_M(ox)KDNTVPLK_		M(1)KDNTVPLK		M(64.65)KDNTVPLK	0	0	0	1	1	sp|P06709|BIRA_ECOLIBifunctionalligase/repressorBirAOS=Escherichiacoli(strainK12)GN=birAPE=1SV=1	sp|P06709|BIRA_ECOLIBifunctionalligase/repressorBirAOS=Escherichiacoli(strainK12)GN=birAPE=1SV=1	sp|P06709|BIRA_ECOLIBifunctionalligase/repressorBirAOS=Escherichiacoli(strainK12)GN=birAPE=1SV=1	MULTI-MSMS	12_J3_	BirADtBio100_DtDigest	531.288	2	531.287	1060.56	29404.8	0.95175	0.00050565	0.74738	0.00039708	1.6991	0.00090273	531.287	46.756	2.5899	46.756	46.134	48.724	0					146	90	2	0	0	0	0.01	3	4827
MKDNTVPLK	9	Oxidation (M)	_M(ox)KDNTVPLK_		M(1)KDNTVPLK		M(49.54)KDNTVPLK	0	0	0	1	1	sp|P06709|BIRA_ECOLIBifunctionalligase/repressorBirAOS=Escherichiacoli(strainK12)GN=birAPE=1SV=1	sp|P06709|BIRA_ECOLIBifunctionalligase/repressorBirAOS=Escherichiacoli(strainK12)GN=birAPE=1SV=1	sp|P06709|BIRA_ECOLIBifunctionalligase/repressorBirAOS=Escherichiacoli(strainK12)GN=birAPE=1SV=1	MULTI-MSMS	12_J3_	BirADtBio100_DtDigest	354.528	3	354.527	1060.56	35760.3	1.9201	0.00068074	0.083777	2.9701e-05	2.0039	0.00071044	354.527	46.878	5.1868	46.878	43.518	48.705	-3.8147e-06					283	180	2	0	0	0	0.01	1	4932
MKDNTVPLK	9	Oxidation (M)	_M(ox)KDNTVPLK_		M(1)KDNTVPLK		M(52.72)KDNTVPLK	0	0	0	1	1	sp|P06709|BIRA_ECOLIBifunctionalligase/repressorBirAOS=Escherichiacoli(strainK12)GN=birAPE=1SV=1	sp|P06709|BIRA_ECOLIBifunctionalligase/repressorBirAOS=Escherichiacoli(strainK12)GN=birAPE=1SV=1	sp|P06709|BIRA_ECOLIBifunctionalligase/repressorBirAOS=Escherichiacoli(strainK12)GN=birAPE=1SV=1	MSMS	12_J3_	BirADtBio100_DtDigest	531.287	2	531.287	1060.56	NaN	NaN	NaN	NaN	NaN	NaN	NaN	NaN	15.425	1	15.425	14.925	15.925	9.5367e-07								0	0	0	0.01	1	1103
MKDNTVPLK	9	Oxidation (M)	_M(ox)KDNTVPLK_		M(1)KDNTVPLK		M(53.97)KDNTVPLK	0	0	0	1	1	sp|P06709|BIRA_ECOLIBifunctionalligase/repressorBirAOS=Escherichiacoli(strainK12)GN=birAPE=1SV=1	sp|P06709|BIRA_ECOLIBifunctionalligase/repressorBirAOS=Escherichiacoli(strainK12)GN=birAPE=1SV=1	sp|P06709|BIRA_ECOLIBifunctionalligase/repressorBirAOS=Escherichiacoli(strainK12)GN=birAPE=1SV=1	MSMS	12_J3_	BirADtBio100_DtDigest	531.287	2	531.287	1060.56	NaN	NaN	NaN	NaN	NaN	NaN	NaN	NaN	18.072	1	18.072	17.572	18.572	0								0	0	0	0.01	1	1376
NTLAAMLIR	9	Oxidation (M)	_NTLAAM(ox)LIR_		NTLAAM(1)LIR		NTLAAM(82.75)LIR	0	0	0	1	0	sp|P06709|BIRA_ECOLIBifunctionalligase/repressorBirAOS=Escherichiacoli(strainK12)GN=birAPE=1SV=1	sp|P06709|BIRA_ECOLIBifunctionalligase/repressorBirAOS=Escherichiacoli(strainK12)GN=birAPE=1SV=1	sp|P06709|BIRA_ECOLIBifunctionalligase/repressorBirAOS=Escherichiacoli(strainK12)GN=birAPE=1SV=1	MULTI-MSMS	12_J3_	BirADtBio100_DtDigest	509.793	2	509.789	1017.56	29597.9	1.3883	0.00070776	-0.35079	-0.00017883	1.0375	0.00052893	509.789	64.679	3.3782	64.679	61.818	65.196	0					236	76	5	0	0	0	0.01	4	6957
NTLAAMLIR	9	Oxidation (M)	_NTLAAM(ox)LIR_		NTLAAM(1)LIR		NTLAAM(199.7)LIR	0	0	0	1	0	sp|P06709|BIRA_ECOLIBifunctionalligase/repressorBirAOS=Escherichiacoli(strainK12)GN=birAPE=1SV=1	sp|P06709|BIRA_ECOLIBifunctionalligase/repressorBirAOS=Escherichiacoli(strainK12)GN=birAPE=1SV=1	sp|P06709|BIRA_ECOLIBifunctionalligase/repressorBirAOS=Escherichiacoli(strainK12)GN=birAPE=1SV=1	MULTI-MSMS	12_J3_	BirADtBio100_DtDigest	509.79	2	509.789	1017.56	29611.9	1.4157	0.0007217	-0.007874	-4.0141e-06	1.4078	0.00071769	509.79	65.575	3.1475	65.575	65.196	68.343	0					192	76	3	0	0	0	0.01	4	7406
NTLAAMLIR	9	Oxidation (M)	_NTLAAM(ox)LIR_		NTLAAM(1)LIR		NTLAAM(154.49)LIR	0	0	0	1	0	sp|P06709|BIRA_ECOLIBifunctionalligase/repressorBirAOS=Escherichiacoli(strainK12)GN=birAPE=1SV=1	sp|P06709|BIRA_ECOLIBifunctionalligase/repressorBirAOS=Escherichiacoli(strainK12)GN=birAPE=1SV=1	sp|P06709|BIRA_ECOLIBifunctionalligase/repressorBirAOS=Escherichiacoli(strainK12)GN=birAPE=1SV=1	MULTI-MSMS	12_J3_	BirADtBio100_DtDigest	509.79	2	509.789	1017.56	28752.1	1.762	0.00089824	-0.27955	-0.00014251	1.4824	0.00075573	509.789	80.855	3.2519	80.855	79.323	82.575	0					190	68	4	0	0	0	0.01	3	9529
QGALLLEQDGIIKPWMGGEISLR	23	Oxidation (M)	_QGALLLEQDGIIKPWM(ox)GGEISLR_		QGALLLEQDGIIKPWM(1)GGEISLR		QGALLLEQDGIIKPWM(74.32)GGEISLR	0	0	0	1	1	sp|P06709|BIRA_ECOLIBifunctionalligase/repressorBirAOS=Escherichiacoli(strainK12)GN=birAPE=1SV=1	sp|P06709|BIRA_ECOLIBifunctionalligase/repressorBirAOS=Escherichiacoli(strainK12)GN=birAPE=1SV=1	sp|P06709|BIRA_ECOLIBifunctionalligase/repressorBirAOS=Escherichiacoli(strainK12)GN=birAPE=1SV=1	MULTI-MSMS	12_J3_	BirADtBio100_DtDigest	847.794	3	847.456	2539.35	22660.2	2.2522	0.0019087	1.1119	0.0009423	3.3642	0.002851	847.792	94.269	3.0236	94.269	93.46	96.483	7.6294e-06					276	96	6	0	0	0	0.01	1	11458
QGALLLEQDGIIKPWMGGEISLR	23	Oxidation (M)	_QGALLLEQDGIIKPWM(ox)GGEISLR_		QGALLLEQDGIIKPWM(1)GGEISLR		QGALLLEQDGIIKPWM(72.88)GGEISLR	0	0	0	1	1	sp|P06709|BIRA_ECOLIBifunctionalligase/repressorBirAOS=Escherichiacoli(strainK12)GN=birAPE=1SV=1	sp|P06709|BIRA_ECOLIBifunctionalligase/repressorBirAOS=Escherichiacoli(strainK12)GN=birAPE=1SV=1	sp|P06709|BIRA_ECOLIBifunctionalligase/repressorBirAOS=Escherichiacoli(strainK12)GN=birAPE=1SV=1	MULTI-MSMS	12_J3_	BirADtBio100_DtDigest	636.097	4	635.844	2539.35	26958.5	1.2795	0.00081357	0.97969	0.00062293	2.2592	0.0014365	636.095	94.355	0.64348	94.355	94.016	94.659	-7.6294e-06					39	21	4	0	0	0	0.01	1	11479
QGALLLEQDGIIKPWMGGEISLR	23	Oxidation (M)	_QGALLLEQDGIIKPWM(ox)GGEISLR_		QGALLLEQDGIIKPWM(1)GGEISLR		QGALLLEQDGIIKPWM(62.47)GGEISLR	0	0	0	1	1	sp|P06709|BIRA_ECOLIBifunctionalligase/repressorBirAOS=Escherichiacoli(strainK12)GN=birAPE=1SV=1	sp|P06709|BIRA_ECOLIBifunctionalligase/repressorBirAOS=Escherichiacoli(strainK12)GN=birAPE=1SV=1	sp|P06709|BIRA_ECOLIBifunctionalligase/repressorBirAOS=Escherichiacoli(strainK12)GN=birAPE=1SV=1	MULTI-MSMS	12_J3_	BirADtBio100_DtDigest	1271.69	2	1270.68	2539.35	18433.7	4.2255	0.0053693	0.53314	0.00067745	4.7586	0.0060467	1271.18	94.269	1.2667	94.269	93.721	94.988	0					142	39	5	0	0	0	0.01	1	11498
QGALLLEQDGIIKPWMGGEISLR	23	Oxidation (M)	_QGALLLEQDGIIKPWM(ox)GGEISLR_		QGALLLEQDGIIKPWM(1)GGEISLR		QGALLLEQDGIIKPWM(105.79)GGEISLR	0	0	0	1	1	sp|P06709|BIRA_ECOLIBifunctionalligase/repressorBirAOS=Escherichiacoli(strainK12)GN=birAPE=1SV=1	sp|P06709|BIRA_ECOLIBifunctionalligase/repressorBirAOS=Escherichiacoli(strainK12)GN=birAPE=1SV=1	sp|P06709|BIRA_ECOLIBifunctionalligase/repressorBirAOS=Escherichiacoli(strainK12)GN=birAPE=1SV=1	MULTI-MSMS	12_J3_	BirADtBio100_DtDigest	847.792	3	847.456	2539.35	22590.5	1.9956	0.0016912	-0.019572	-1.6587e-05	1.976	0.0016746	847.79	98.739	3.4136	98.739	96.442	99.856	0					332	103	5	0	0	0	0.01	4	11794
RVEESVVNQGWITLQEAGINLDRNTLAAMLIR	32	Oxidation (M)	_RVEESVVNQGWITLQEAGINLDRNTLAAM(ox)LIR_		RVEESVVNQGWITLQEAGINLDRNTLAAM(1)LIR		RVEESVVNQGWITLQEAGINLDRNTLAAM(76.98)LIR	0	0	0	1	2	sp|P06709|BIRA_ECOLIBifunctionalligase/repressorBirAOS=Escherichiacoli(strainK12)GN=birAPE=1SV=1	sp|P06709|BIRA_ECOLIBifunctionalligase/repressorBirAOS=Escherichiacoli(strainK12)GN=birAPE=1SV=1	sp|P06709|BIRA_ECOLIBifunctionalligase/repressorBirAOS=Escherichiacoli(strainK12)GN=birAPE=1SV=1	MULTI-MSMS	12_J3_	BirADtBio100_DtDigest	907.736	4	907.233	3624.9	22271.5	2.3998	0.0021772	-0.047757	-4.3327e-05	2.352	0.0021339	907.484	102.26	1.5232	102.26	101.77	103.29	0					182	38	8	0	0	0	0.01	1	12453
RVEESVVNQGWITLQEAGINLDRNTLAAMLIR	32	Oxidation (M)	_RVEESVVNQGWITLQEAGINLDRNTLAAM(ox)LIR_		RVEESVVNQGWITLQEAGINLDRNTLAAM(1)LIR		RVEESVVNQGWITLQEAGINLDRNTLAAM(56.46)LIR	0	0	0	1	2	sp|P06709|BIRA_ECOLIBifunctionalligase/repressorBirAOS=Escherichiacoli(strainK12)GN=birAPE=1SV=1	sp|P06709|BIRA_ECOLIBifunctionalligase/repressorBirAOS=Escherichiacoli(strainK12)GN=birAPE=1SV=1	sp|P06709|BIRA_ECOLIBifunctionalligase/repressorBirAOS=Escherichiacoli(strainK12)GN=birAPE=1SV=1	MULTI-MSMS	12_J3_	BirADtBio100_DtDigest	726.19	5	725.988	3624.9	24970.1	1.5659	0.0011368	0.44674	0.00032433	2.0126	0.0014611	726.189	102.28	0.7635	102.28	101.89	102.66	7.6294e-06					59	14	5	0	0	0	0.01	1	12488
TGDAAQIVIGAGINMAMR	18	Oxidation (M)	_TGDAAQIVIGAGINM(ox)AMR_		TGDAAQIVIGAGINM(0.994)AM(0.006)R		TGDAAQIVIGAGINM(21.86)AM(-21.86)R	0	0	0	1	0	sp|P06709|BIRA_ECOLIBifunctionalligase/repressorBirAOS=Escherichiacoli(strainK12)GN=birAPE=1SV=1	sp|P06709|BIRA_ECOLIBifunctionalligase/repressorBirAOS=Escherichiacoli(strainK12)GN=birAPE=1SV=1	sp|P06709|BIRA_ECOLIBifunctionalligase/repressorBirAOS=Escherichiacoli(strainK12)GN=birAPE=1SV=1	MULTI-MSMS	12_J3_	BirADtBio100_DtDigest	902.964	2	902.956	1803.9	22370.9	2.1981	0.0019848	0.73971	0.00066792	2.9378	0.0026527	903.458	78.51	1.1833	78.51	77.638	78.821	0					113	28	5	0	0	0	0.01	2	9209
TGDAAQIVIGAGINMAMR	18	Oxidation (M)	_TGDAAQIVIGAGINM(ox)AMR_		TGDAAQIVIGAGINM(1)AMR		TGDAAQIVIGAGINM(40.42)AM(-40.42)R	0	0	0	1	0	sp|P06709|BIRA_ECOLIBifunctionalligase/repressorBirAOS=Escherichiacoli(strainK12)GN=birAPE=1SV=1	sp|P06709|BIRA_ECOLIBifunctionalligase/repressorBirAOS=Escherichiacoli(strainK12)GN=birAPE=1SV=1	sp|P06709|BIRA_ECOLIBifunctionalligase/repressorBirAOS=Escherichiacoli(strainK12)GN=birAPE=1SV=1	MULTI-MSMS	12_J3_	BirADtBio100_DtDigest	602.642	3	602.306	1803.9	27160.3	1.1806	0.00071106	-0.35065	-0.0002112	0.82991	0.00049986	602.306	79.258	3.0356	79.258	77.506	80.542	0					254	65	6	0	0	0	0.01	3	9257
TGDAAQIVIGAGINMAMR	18	Oxidation (M)	_TGDAAQIVIGAGINM(ox)AMR_		TGDAAQIVIGAGINM(0.984)AM(0.016)R		TGDAAQIVIGAGINM(17.8)AM(-17.8)R	0	0	0	1	0	sp|P06709|BIRA_ECOLIBifunctionalligase/repressorBirAOS=Escherichiacoli(strainK12)GN=birAPE=1SV=1	sp|P06709|BIRA_ECOLIBifunctionalligase/repressorBirAOS=Escherichiacoli(strainK12)GN=birAPE=1SV=1	sp|P06709|BIRA_ECOLIBifunctionalligase/repressorBirAOS=Escherichiacoli(strainK12)GN=birAPE=1SV=1	MULTI-MSMS	12_J3_	BirADtBio100_DtDigest	902.958	2	902.956	1803.9	22370.9	2.2294	0.0020131	0.45937	0.00041479	2.6888	0.0024279	902.957	79.259	1.6436	79.259	78.766	80.41	0					123	32	5	0	0	0	0.01	2	9424
TGDAAQIVIGAGINMAMR	18	Oxidation (M)	_TGDAAQIVIGAGINMAM(ox)R_		TGDAAQIVIGAGINMAM(1)R		TGDAAQIVIGAGINM(-41.62)AM(41.62)R	0	0	0	1	0	sp|P06709|BIRA_ECOLIBifunctionalligase/repressorBirAOS=Escherichiacoli(strainK12)GN=birAPE=1SV=1	sp|P06709|BIRA_ECOLIBifunctionalligase/repressorBirAOS=Escherichiacoli(strainK12)GN=birAPE=1SV=1	sp|P06709|BIRA_ECOLIBifunctionalligase/repressorBirAOS=Escherichiacoli(strainK12)GN=birAPE=1SV=1	MULTI-MSMS	12_J3_	BirADtBio100_DtDigest	902.959	2	902.956	1803.9	21656.4	2.3715	0.0021413	0.056327	5.0861e-05	2.4278	0.0021922	902.956	83.315	2.6021	83.315	82.401	85.003	0					251	76	6	0	0	0	0.01	3	9907
TGDAAQIVIGAGINMAMR	18	Oxidation (M)	_TGDAAQIVIGAGINMAM(ox)R_		TGDAAQIVIGAGINM(0.003)AM(0.997)R		TGDAAQIVIGAGINM(-25.08)AM(25.08)R	0	0	0	1	0	sp|P06709|BIRA_ECOLIBifunctionalligase/repressorBirAOS=Escherichiacoli(strainK12)GN=birAPE=1SV=1	sp|P06709|BIRA_ECOLIBifunctionalligase/repressorBirAOS=Escherichiacoli(strainK12)GN=birAPE=1SV=1	sp|P06709|BIRA_ECOLIBifunctionalligase/repressorBirAOS=Escherichiacoli(strainK12)GN=birAPE=1SV=1	MULTI-MSMS	12_J3_	BirADtBio100_DtDigest	602.307	3	602.306	1803.9	27194.4	1.3358	0.00080455	-0.73902	-0.00044512	0.59676	0.00035943	602.306	83.276	3.8016	83.276	81.991	85.792	0					399	104	6	0	0	0	0.01	4	9916
TGDAAQIVIGAGINMAMR	18	Oxidation (M)	_TGDAAQIVIGAGINMAM(ox)R_		TGDAAQIVIGAGINM(0.018)AM(0.982)R		TGDAAQIVIGAGINM(-17.49)AM(17.49)R	0	0	0	1	0	sp|P06709|BIRA_ECOLIBifunctionalligase/repressorBirAOS=Escherichiacoli(strainK12)GN=birAPE=1SV=1	sp|P06709|BIRA_ECOLIBifunctionalligase/repressorBirAOS=Escherichiacoli(strainK12)GN=birAPE=1SV=1	sp|P06709|BIRA_ECOLIBifunctionalligase/repressorBirAOS=Escherichiacoli(strainK12)GN=birAPE=1SV=1	MULTI-MSMS	12_J3_	BirADtBio100_DtDigest	902.957	2	902.956	1803.9	20889	2.5869	0.0023358	-0.25873	-0.00023363	2.3281	0.0021022	903.458	90.072	0.64881	90.072	89.745	90.393	0					36	28	2	0	0	0	0.01	1	10922
TGDAAQIVIGAGINMAMR	18	Oxidation (M)	_TGDAAQIVIGAGINMAM(ox)R_		TGDAAQIVIGAGINM(0.002)AM(0.998)R		TGDAAQIVIGAGINM(-26.07)AM(26.07)R	0	0	0	1	0	sp|P06709|BIRA_ECOLIBifunctionalligase/repressorBirAOS=Escherichiacoli(strainK12)GN=birAPE=1SV=1	sp|P06709|BIRA_ECOLIBifunctionalligase/repressorBirAOS=Escherichiacoli(strainK12)GN=birAPE=1SV=1	sp|P06709|BIRA_ECOLIBifunctionalligase/repressorBirAOS=Escherichiacoli(strainK12)GN=birAPE=1SV=1	MULTI-MSMS	12_J3_	BirADtBio100_DtDigest	602.642	3	602.306	1803.9	27593.4	1.5667	0.00094361	-0.47551	-0.0002864	1.0912	0.00065721	602.306	92.771	4.8526	92.771	89.691	94.544	0					289	166	3	0	0	0	0.01	3	10934
TGDAAQIVIGAGINMAMR	18	Oxidation (M)	_TGDAAQIVIGAGINM(ox)AMR_		TGDAAQIVIGAGINM(0.825)AM(0.175)R		TGDAAQIVIGAGINM(6.74)AM(-6.74)R	0	0	0	1	0	sp|P06709|BIRA_ECOLIBifunctionalligase/repressorBirAOS=Escherichiacoli(strainK12)GN=birAPE=1SV=1	sp|P06709|BIRA_ECOLIBifunctionalligase/repressorBirAOS=Escherichiacoli(strainK12)GN=birAPE=1SV=1	sp|P06709|BIRA_ECOLIBifunctionalligase/repressorBirAOS=Escherichiacoli(strainK12)GN=birAPE=1SV=1	MULTI-MSMS	12_J3_	BirADtBio100_DtDigest	902.959	2	902.956	1803.9	22102	2.5957	0.0023438	0.23168	0.0002092	2.8274	0.002553	902.956	92.965	2.7668	92.965	91.058	93.825	0					158	86	3	0	0	0	0.01	3	11078
TGDAAQIVIGAGINMAMR	18	Oxidation (M)	_TGDAAQIVIGAGINM(ox)AMR_		TGDAAQIVIGAGINM(0.706)AM(0.294)R		TGDAAQIVIGAGINM(3.8)AM(-3.8)R	0	0	0	1	0	sp|P06709|BIRA_ECOLIBifunctionalligase/repressorBirAOS=Escherichiacoli(strainK12)GN=birAPE=1SV=1	sp|P06709|BIRA_ECOLIBifunctionalligase/repressorBirAOS=Escherichiacoli(strainK12)GN=birAPE=1SV=1	sp|P06709|BIRA_ECOLIBifunctionalligase/repressorBirAOS=Escherichiacoli(strainK12)GN=birAPE=1SV=1	MSMS	12_J3_	BirADtBio100_DtDigest	903.427	2	902.956	1803.9	NaN	NaN	NaN	NaN	NaN	NaN	NaN	NaN	89.405	1	89.405	88.905	89.905	-7.6294e-06								0	0	0	0.01	1	10814
TGDAAQIVIGAGINMAMRR	19	Oxidation (M)	_TGDAAQIVIGAGINM(ox)AMRR_		TGDAAQIVIGAGINM(0.539)AM(0.461)RR		TGDAAQIVIGAGINM(0.67)AM(-0.67)RR	0	0	0	1	1	sp|P06709|BIRA_ECOLIBifunctionalligase/repressorBirAOS=Escherichiacoli(strainK12)GN=birAPE=1SV=1	sp|P06709|BIRA_ECOLIBifunctionalligase/repressorBirAOS=Escherichiacoli(strainK12)GN=birAPE=1SV=1	sp|P06709|BIRA_ECOLIBifunctionalligase/repressorBirAOS=Escherichiacoli(strainK12)GN=birAPE=1SV=1	MULTI-MSMS	12_J3_	BirADtBio100_DtDigest	654.34	3	654.34	1960	26036.5	1.3442	0.00087953	-0.20877	-0.0001366	1.1354	0.00074293	654.34	86.915	1.5762	86.915	86.16	87.736	0					131	41	5	0	0	0	0.01	2	10427
VEESVVNQGWITLQEAGINLDRNTLAAMLIR	31	Oxidation (M)	_VEESVVNQGWITLQEAGINLDRNTLAAM(ox)LIR_		VEESVVNQGWITLQEAGINLDRNTLAAM(1)LIR		VEESVVNQGWITLQEAGINLDRNTLAAM(52.47)LIR	0	0	0	1	1	sp|P06709|BIRA_ECOLIBifunctionalligase/repressorBirAOS=Escherichiacoli(strainK12)GN=birAPE=1SV=1	sp|P06709|BIRA_ECOLIBifunctionalligase/repressorBirAOS=Escherichiacoli(strainK12)GN=birAPE=1SV=1	sp|P06709|BIRA_ECOLIBifunctionalligase/repressorBirAOS=Escherichiacoli(strainK12)GN=birAPE=1SV=1	MULTI-MSMS	12_J3_	BirADtBio100_DtDigest	1157.61	3	1157.28	3468.8	19342.1	3.5827	0.0041461	-0.098761	-0.00011429	3.4839	0.0040318	1157.94	103.06	1.5694	103.06	102.71	104.28	0					161	43	8	0	0	0	0.01	1	12584
VEESVVNQGWITLQEAGINLDRNTLAAMLIR	31	Oxidation (M)	_VEESVVNQGWITLQEAGINLDRNTLAAM(ox)LIR_		VEESVVNQGWITLQEAGINLDRNTLAAM(1)LIR		VEESVVNQGWITLQEAGINLDRNTLAAM(73.84)LIR	0	0	0	1	1	sp|P06709|BIRA_ECOLIBifunctionalligase/repressorBirAOS=Escherichiacoli(strainK12)GN=birAPE=1SV=1	sp|P06709|BIRA_ECOLIBifunctionalligase/repressorBirAOS=Escherichiacoli(strainK12)GN=birAPE=1SV=1	sp|P06709|BIRA_ECOLIBifunctionalligase/repressorBirAOS=Escherichiacoli(strainK12)GN=birAPE=1SV=1	MULTI-MSMS	12_J3_	BirADtBio100_DtDigest	868.712	4	868.208	3468.8	22690.9	2.2575	0.00196	0.70332	0.00061062	2.9609	0.0025706	868.71	103.06	0.7787	103.06	102.71	103.49	0					86	20	6	0	0	0	0.01	1	12592
WFSPFGANLYLSMFWR	16	Oxidation (M)	_WFSPFGANLYLSM(ox)FWR_		WFSPFGANLYLSM(1)FWR		WFSPFGANLYLSM(147.26)FWR	0	0	0	1	0	sp|P06709|BIRA_ECOLIBifunctionalligase/repressorBirAOS=Escherichiacoli(strainK12)GN=birAPE=1SV=1	sp|P06709|BIRA_ECOLIBifunctionalligase/repressorBirAOS=Escherichiacoli(strainK12)GN=birAPE=1SV=1	sp|P06709|BIRA_ECOLIBifunctionalligase/repressorBirAOS=Escherichiacoli(strainK12)GN=birAPE=1SV=1	MULTI-MSMS	12_J3_	BirADtBio100_DtDigest	1020	2	1019.49	2036.96	20491.8	3.0735	0.0031334	0.41977	0.00042795	3.4933	0.0035613	1019.99	105.79	0.87631	105.79	105.37	106.25	0					106	30	5	0	0	0	0.01	1	12927
WFSPFGANLYLSMFWR	16	Oxidation (M)	_WFSPFGANLYLSM(ox)FWR_		WFSPFGANLYLSM(1)FWR		WFSPFGANLYLSM(117.48)FWR	0	0	0	1	0	sp|P06709|BIRA_ECOLIBifunctionalligase/repressorBirAOS=Escherichiacoli(strainK12)GN=birAPE=1SV=1	sp|P06709|BIRA_ECOLIBifunctionalligase/repressorBirAOS=Escherichiacoli(strainK12)GN=birAPE=1SV=1	sp|P06709|BIRA_ECOLIBifunctionalligase/repressorBirAOS=Escherichiacoli(strainK12)GN=birAPE=1SV=1	MULTI-MSMS	12_J3_	BirADtBio100_DtDigest	680.331	3	679.994	2036.96	26651.8	1.5135	0.0010291	1.6365	0.0011128	3.15	0.002142	680.33	105.88	0.42859	105.88	105.48	105.91	0					32	13	3	0	0	0	0.01	1	12955
AAINKHIQTLR	11	Unmodified	_AAINKHIQTLR_					0	0	0	0	1	sp|P06709|BIRA_ECOLIBifunctionalligase/repressorBirAOS=Escherichiacoli(strainK12)GN=birAPE=1SV=1	sp|P06709|BIRA_ECOLIBifunctionalligase/repressorBirAOS=Escherichiacoli(strainK12)GN=birAPE=1SV=1	sp|P06709|BIRA_ECOLIBifunctionalligase/repressorBirAOS=Escherichiacoli(strainK12)GN=birAPE=1SV=1	MULTI-MSMS	12_J3_	BirADtBio100_DtDigest	422.255	3	422.254	1263.74	31508.8	1.7679	0.00074649	0.70112	0.00029605	2.469	0.0010425	422.254	58.671	0.99128	58.671	57.77	58.761	3.8147e-06					33	25	2	0	0	0	0.01	1	6478
AAINKHIQTLR	11	Unmodified	_AAINKHIQTLR_					0	0	0	0	1	sp|P06709|BIRA_ECOLIBifunctionalligase/repressorBirAOS=Escherichiacoli(strainK12)GN=birAPE=1SV=1	sp|P06709|BIRA_ECOLIBifunctionalligase/repressorBirAOS=Escherichiacoli(strainK12)GN=birAPE=1SV=1	sp|P06709|BIRA_ECOLIBifunctionalligase/repressorBirAOS=Escherichiacoli(strainK12)GN=birAPE=1SV=1	MULTI-SECPEP	12_J3_	BirADtBio100_DtDigest	422.255	3	422.254	1263.74	31508.8	1.7923	0.00075679	0.68889	0.00029089	2.4812	0.0010477	422.255	59.622	0.70028	59.622	59.34	60.04	0					28	18	2	0	0	0	0.01	1	6599
AALELFEQEGLAPYLSR	17	Unmodified	_AALELFEQEGLAPYLSR_					0	0	0	0	0	sp|P06709|BIRA_ECOLIBifunctionalligase/repressorBirAOS=Escherichiacoli(strainK12)GN=birAPE=1SV=1	sp|P06709|BIRA_ECOLIBifunctionalligase/repressorBirAOS=Escherichiacoli(strainK12)GN=birAPE=1SV=1	sp|P06709|BIRA_ECOLIBifunctionalligase/repressorBirAOS=Escherichiacoli(strainK12)GN=birAPE=1SV=1	MULTI-MSMS	12_J3_	BirADtBio100_DtDigest	954.502	2	953.999	1905.98	21401.5	2.5275	0.0024112	1.2001	0.0011449	3.7276	0.0035561	954.502	100.58	1.5578	100.58	99.424	100.98	0					108	49	3	0	0	0	0.01	1	12219
AALELFEQEGLAPYLSR	17	Unmodified	_AALELFEQEGLAPYLSR_					0	0	0	0	0	sp|P06709|BIRA_ECOLIBifunctionalligase/repressorBirAOS=Escherichiacoli(strainK12)GN=birAPE=1SV=1	sp|P06709|BIRA_ECOLIBifunctionalligase/repressorBirAOS=Escherichiacoli(strainK12)GN=birAPE=1SV=1	sp|P06709|BIRA_ECOLIBifunctionalligase/repressorBirAOS=Escherichiacoli(strainK12)GN=birAPE=1SV=1	MULTI-MSMS	12_J3_	BirADtBio100_DtDigest	954.003	2	953.999	1905.98	21508.4	2.8117	0.0026823	1.3811	0.0013176	4.1928	0.0039999	954.502	106.49	0.99848	106.49	106.17	107.17	0					86	37	3	0	0	0	0.01	1	13068
AALELFEQEGLAPYLSR	17	Unmodified	_AALELFEQEGLAPYLSR_					0	0	0	0	0	sp|P06709|BIRA_ECOLIBifunctionalligase/repressorBirAOS=Escherichiacoli(strainK12)GN=birAPE=1SV=1	sp|P06709|BIRA_ECOLIBifunctionalligase/repressorBirAOS=Escherichiacoli(strainK12)GN=birAPE=1SV=1	sp|P06709|BIRA_ECOLIBifunctionalligase/repressorBirAOS=Escherichiacoli(strainK12)GN=birAPE=1SV=1	MULTI-MSMS	12_J3_	BirADtBio100_DtDigest	954.506	2	953.999	1905.98	21422	2.9317	0.0027969	0.83057	0.00079236	3.7623	0.0035892	954.501	109.3	1.9475	109.3	108.42	110.36	0					209	103	3	0	0	0	0.01	2	13322
AALELFEQEGLAPYLSR	17	Unmodified	_AALELFEQEGLAPYLSR_					0	0	0	0	0	sp|P06709|BIRA_ECOLIBifunctionalligase/repressorBirAOS=Escherichiacoli(strainK12)GN=birAPE=1SV=1	sp|P06709|BIRA_ECOLIBifunctionalligase/repressorBirAOS=Escherichiacoli(strainK12)GN=birAPE=1SV=1	sp|P06709|BIRA_ECOLIBifunctionalligase/repressorBirAOS=Escherichiacoli(strainK12)GN=birAPE=1SV=1	MULTI-MSMS	12_J3_	BirADtBio100_DtDigest	954.503	2	953.999	1905.98	21038.3	2.9937	0.002856	0.47338	0.00045161	3.4671	0.0033076	954.502	110.83	0.30762	110.83	110.68	110.99	0					38	24	2	0	0	0	0.01	1	13500
AALELFEQEGLAPYLSR	17	Unmodified	_AALELFEQEGLAPYLSR_					0	0	0	0	0	sp|P06709|BIRA_ECOLIBifunctionalligase/repressorBirAOS=Escherichiacoli(strainK12)GN=birAPE=1SV=1	sp|P06709|BIRA_ECOLIBifunctionalligase/repressorBirAOS=Escherichiacoli(strainK12)GN=birAPE=1SV=1	sp|P06709|BIRA_ECOLIBifunctionalligase/repressorBirAOS=Escherichiacoli(strainK12)GN=birAPE=1SV=1	MULTI-MSMS	12_J3_	BirADtBio100_DtDigest	954.504	2	953.999	1905.98	21075.2	3.0353	0.0028957	0.22242	0.00021219	3.2578	0.0031079	953.999	111.75	0.49012	111.75	111.51	112	-7.6294e-06					92	39	3	0	0	0	0.01	1	13572
AALELFEQEGLAPYLSR	17	Unmodified	_AALELFEQEGLAPYLSR_					0	0	0	0	0	sp|P06709|BIRA_ECOLIBifunctionalligase/repressorBirAOS=Escherichiacoli(strainK12)GN=birAPE=1SV=1	sp|P06709|BIRA_ECOLIBifunctionalligase/repressorBirAOS=Escherichiacoli(strainK12)GN=birAPE=1SV=1	sp|P06709|BIRA_ECOLIBifunctionalligase/repressorBirAOS=Escherichiacoli(strainK12)GN=birAPE=1SV=1	MULTI-MSMS	12_J3_	BirADtBio100_DtDigest	954.003	2	953.999	1905.98	20690.7	3.1063	0.0029634	0.47385	0.00045205	3.5802	0.0034155	954.501	113.2	0.90538	113.2	112.94	113.84	0					118	72	3	0	0	0	0.01	1	13713
AALELFEQEGLAPYLSR	17	Unmodified	_AALELFEQEGLAPYLSR_					0	0	0	0	0	sp|P06709|BIRA_ECOLIBifunctionalligase/repressorBirAOS=Escherichiacoli(strainK12)GN=birAPE=1SV=1	sp|P06709|BIRA_ECOLIBifunctionalligase/repressorBirAOS=Escherichiacoli(strainK12)GN=birAPE=1SV=1	sp|P06709|BIRA_ECOLIBifunctionalligase/repressorBirAOS=Escherichiacoli(strainK12)GN=birAPE=1SV=1	MULTI-MSMS	12_J3_	BirADtBio100_DtDigest	954.506	2	953.999	1905.98	21445.5	3.1296	0.0029857	0.63973	0.0006103	3.7694	0.003596	954.502	113.86	0.36697	113.86	113.76	114.13	7.6294e-06					54	29	3	0	0	0	0.01	1	13788
AALELFEQEGLAPYLSR	17	Unmodified	_AALELFEQEGLAPYLSR_					0	0	0	0	0	sp|P06709|BIRA_ECOLIBifunctionalligase/repressorBirAOS=Escherichiacoli(strainK12)GN=birAPE=1SV=1	sp|P06709|BIRA_ECOLIBifunctionalligase/repressorBirAOS=Escherichiacoli(strainK12)GN=birAPE=1SV=1	sp|P06709|BIRA_ECOLIBifunctionalligase/repressorBirAOS=Escherichiacoli(strainK12)GN=birAPE=1SV=1	MSMS	12_J3_	BirADtBio100_DtDigest	954.001	2	953.999	1905.98	NaN	NaN	NaN	NaN	NaN	NaN	NaN	NaN	115.94	1	115.94	115.44	116.44	0								0	0	0	0.01	1	13961
AALELFEQEGLAPYLSR	17	Unmodified	_AALELFEQEGLAPYLSR_					0	0	0	0	0	sp|P06709|BIRA_ECOLIBifunctionalligase/repressorBirAOS=Escherichiacoli(strainK12)GN=birAPE=1SV=1	sp|P06709|BIRA_ECOLIBifunctionalligase/repressorBirAOS=Escherichiacoli(strainK12)GN=birAPE=1SV=1	sp|P06709|BIRA_ECOLIBifunctionalligase/repressorBirAOS=Escherichiacoli(strainK12)GN=birAPE=1SV=1	MULTI-SECPEP	12_J3_	BirADtBio100_DtDigest	952.817	2	953.999	1905.98	21767.8	2.5673	0.0024492	-4.1433	-0.0039527	-1.576	-0.0015035	954.498	101.34	0.31849	101.34	101.09	101.41	0					11	9	2	0	0	0	0.01	1	12375
AALELFEQEGLAPYLSR	17	Unmodified	_AALELFEQEGLAPYLSR_					0	0	0	0	0	sp|P06709|BIRA_ECOLIBifunctionalligase/repressorBirAOS=Escherichiacoli(strainK12)GN=birAPE=1SV=1	sp|P06709|BIRA_ECOLIBifunctionalligase/repressorBirAOS=Escherichiacoli(strainK12)GN=birAPE=1SV=1	sp|P06709|BIRA_ECOLIBifunctionalligase/repressorBirAOS=Escherichiacoli(strainK12)GN=birAPE=1SV=1	MULTI-SECPEP	12_J3_	BirADtBio100_DtDigest	954.004	2	953.999	1905.98	21327.1	3.0514	0.0029111	0.44436	0.00042392	3.4958	0.003335	954.501	112.07	0.55962	112.07	111.86	112.42	7.6294e-06					69	44	2	0	0	0	0.01	1	13639
DNTVPLK	7	Unmodified	_DNTVPLK_					0	0	0	0	0	sp|P06709|BIRA_ECOLIBifunctionalligase/repressorBirAOS=Escherichiacoli(strainK12)GN=birAPE=1SV=1	sp|P06709|BIRA_ECOLIBifunctionalligase/repressorBirAOS=Escherichiacoli(strainK12)GN=birAPE=1SV=1	sp|P06709|BIRA_ECOLIBifunctionalligase/repressorBirAOS=Escherichiacoli(strainK12)GN=birAPE=1SV=1	MULTI-MSMS	12_J3_	BirADtBio100_DtDigest	393.722	2	393.721	785.428	31716	1.2502	0.00049222	0.57133	0.00022494	1.8215	0.00071716	393.721	21.426	1.6578	21.426	20.654	22.312	0					166	60	4	0	0	0	0.01	1	1747
DNTVPLK	7	Unmodified	_DNTVPLK_					0	0	0	0	0	sp|P06709|BIRA_ECOLIBifunctionalligase/repressorBirAOS=Escherichiacoli(strainK12)GN=birAPE=1SV=1	sp|P06709|BIRA_ECOLIBifunctionalligase/repressorBirAOS=Escherichiacoli(strainK12)GN=birAPE=1SV=1	sp|P06709|BIRA_ECOLIBifunctionalligase/repressorBirAOS=Escherichiacoli(strainK12)GN=birAPE=1SV=1	MULTI-SECPEP	12_J3_	BirADtBio100_DtDigest	787.827	1	786.436	785.428	22913.6	0.65125	0.00051217	1.2888	0.0010135	1.94	0.0015257	786.437	25.165	1.8371	25.165	23.996	25.833	0					78	56	2	0	0	0	0.01	1	2263
DWGVDVFTVPGK	12	Unmodified	_DWGVDVFTVPGK_					0	0	0	0	0	sp|P06709|BIRA_ECOLIBifunctionalligase/repressorBirAOS=Escherichiacoli(strainK12)GN=birAPE=1SV=1	sp|P06709|BIRA_ECOLIBifunctionalligase/repressorBirAOS=Escherichiacoli(strainK12)GN=birAPE=1SV=1	sp|P06709|BIRA_ECOLIBifunctionalligase/repressorBirAOS=Escherichiacoli(strainK12)GN=birAPE=1SV=1	MULTI-MSMS	12_J3_	BirADtBio100_DtDigest	660.337	2	660.335	1318.66	25138.8	0.67286	0.00044431	3.0363	0.002005	3.7092	0.0024493	660.838	57.948	1.138	57.948	56.984	58.122	0					51	26	3	0	0	0	0.01	1	6299
DWGVDVFTVPGK	12	Unmodified	_DWGVDVFTVPGK_					0	0	0	0	0	sp|P06709|BIRA_ECOLIBifunctionalligase/repressorBirAOS=Escherichiacoli(strainK12)GN=birAPE=1SV=1	sp|P06709|BIRA_ECOLIBifunctionalligase/repressorBirAOS=Escherichiacoli(strainK12)GN=birAPE=1SV=1	sp|P06709|BIRA_ECOLIBifunctionalligase/repressorBirAOS=Escherichiacoli(strainK12)GN=birAPE=1SV=1	MULTI-MSMS	12_J3_	BirADtBio100_DtDigest	660.336	2	660.335	1318.66	25158.6	0.68344	0.0004513	0.38488	0.00025415	1.0683	0.00070545	660.335	58.187	0.86618	58.187	58.05	58.916	3.8147e-06					33	24	3	0	0	0	0.01	1	6413
DWGVDVFTVPGK	12	Unmodified	_DWGVDVFTVPGK_					0	0	0	0	0	sp|P06709|BIRA_ECOLIBifunctionalligase/repressorBirAOS=Escherichiacoli(strainK12)GN=birAPE=1SV=1	sp|P06709|BIRA_ECOLIBifunctionalligase/repressorBirAOS=Escherichiacoli(strainK12)GN=birAPE=1SV=1	sp|P06709|BIRA_ECOLIBifunctionalligase/repressorBirAOS=Escherichiacoli(strainK12)GN=birAPE=1SV=1	MULTI-MSMS	12_J3_	BirADtBio100_DtDigest	440.56	3	440.559	1318.66	32454.1	2.1569	0.00095025	0.10857	4.7831e-05	2.2655	0.00099808	440.559	81.042	1.3102	81.042	80.451	81.761	0					50	28	2	0	0	0	0.01	2	9637
DWGVDVFTVPGK	12	Unmodified	_DWGVDVFTVPGK_					0	0	0	0	0	sp|P06709|BIRA_ECOLIBifunctionalligase/repressorBirAOS=Escherichiacoli(strainK12)GN=birAPE=1SV=1	sp|P06709|BIRA_ECOLIBifunctionalligase/repressorBirAOS=Escherichiacoli(strainK12)GN=birAPE=1SV=1	sp|P06709|BIRA_ECOLIBifunctionalligase/repressorBirAOS=Escherichiacoli(strainK12)GN=birAPE=1SV=1	MULTI-MSMS	12_J3_	BirADtBio100_DtDigest	660.336	2	660.335	1318.66	25756	1.3394	0.00088443	1.2295	0.00081191	2.5689	0.0016963	660.337	85.858	3.8435	85.858	84.805	88.648	0					404	109	5	0	0	0	0.01	5	10230
DWGVDVFTVPGK	12	Unmodified	_DWGVDVFTVPGK_					0	0	0	0	0	sp|P06709|BIRA_ECOLIBifunctionalligase/repressorBirAOS=Escherichiacoli(strainK12)GN=birAPE=1SV=1	sp|P06709|BIRA_ECOLIBifunctionalligase/repressorBirAOS=Escherichiacoli(strainK12)GN=birAPE=1SV=1	sp|P06709|BIRA_ECOLIBifunctionalligase/repressorBirAOS=Escherichiacoli(strainK12)GN=birAPE=1SV=1	MULTI-MSMS	12_J3_	BirADtBio100_DtDigest	440.56	3	440.559	1318.66	32956.1	2.3125	0.0010188	0.11789	5.1938e-05	2.4304	0.0010707	440.559	85.771	0.11924	85.771	85.673	85.792	0					4	2	2	0	0	0	0.01	1	10315
DWGVDVFTVPGK	12	Unmodified	_DWGVDVFTVPGK_					0	0	0	0	0	sp|P06709|BIRA_ECOLIBifunctionalligase/repressorBirAOS=Escherichiacoli(strainK12)GN=birAPE=1SV=1	sp|P06709|BIRA_ECOLIBifunctionalligase/repressorBirAOS=Escherichiacoli(strainK12)GN=birAPE=1SV=1	sp|P06709|BIRA_ECOLIBifunctionalligase/repressorBirAOS=Escherichiacoli(strainK12)GN=birAPE=1SV=1	MSMS	12_J3_	BirADtBio100_DtDigest	660.335	2	660.335	1318.66	NaN	NaN	NaN	NaN	NaN	NaN	NaN	NaN	98.778	1	98.778	98.278	99.278	0								0	0	0	0.01	1	12043
DWGVDVFTVPGK	12	Unmodified	_DWGVDVFTVPGK_					0	0	0	0	0	sp|P06709|BIRA_ECOLIBifunctionalligase/repressorBirAOS=Escherichiacoli(strainK12)GN=birAPE=1SV=1	sp|P06709|BIRA_ECOLIBifunctionalligase/repressorBirAOS=Escherichiacoli(strainK12)GN=birAPE=1SV=1	sp|P06709|BIRA_ECOLIBifunctionalligase/repressorBirAOS=Escherichiacoli(strainK12)GN=birAPE=1SV=1	MSMS	12_J3_	BirADtBio100_DtDigest	660.337	2	660.335	1318.66	NaN	NaN	NaN	NaN	NaN	NaN	NaN	NaN	105.45	1	105.45	104.95	105.95	0								0	0	0	0.01	1	12909
DWGVDVFTVPGK	12	Unmodified	_DWGVDVFTVPGK_					0	0	0	0	0	sp|P06709|BIRA_ECOLIBifunctionalligase/repressorBirAOS=Escherichiacoli(strainK12)GN=birAPE=1SV=1	sp|P06709|BIRA_ECOLIBifunctionalligase/repressorBirAOS=Escherichiacoli(strainK12)GN=birAPE=1SV=1	sp|P06709|BIRA_ECOLIBifunctionalligase/repressorBirAOS=Escherichiacoli(strainK12)GN=birAPE=1SV=1	MSMS	12_J3_	BirADtBio100_DtDigest	660.34	2	660.335	1318.66	NaN	NaN	NaN	NaN	NaN	NaN	NaN	NaN	107.01	1	107.01	106.51	107.51	0								0	0	0	0.01	1	13093
DWGVDVFTVPGK	12	Unmodified	_DWGVDVFTVPGK_					0	0	0	0	0	sp|P06709|BIRA_ECOLIBifunctionalligase/repressorBirAOS=Escherichiacoli(strainK12)GN=birAPE=1SV=1	sp|P06709|BIRA_ECOLIBifunctionalligase/repressorBirAOS=Escherichiacoli(strainK12)GN=birAPE=1SV=1	sp|P06709|BIRA_ECOLIBifunctionalligase/repressorBirAOS=Escherichiacoli(strainK12)GN=birAPE=1SV=1	MSMS	12_J3_	BirADtBio100_DtDigest	660.337	2	660.335	1318.66	NaN	NaN	NaN	NaN	NaN	NaN	NaN	NaN	107.79	1	107.79	107.29	108.29	0								0	0	0	0.01	1	13177
DWGVDVFTVPGK	12	Unmodified	_DWGVDVFTVPGK_					0	0	0	0	0	sp|P06709|BIRA_ECOLIBifunctionalligase/repressorBirAOS=Escherichiacoli(strainK12)GN=birAPE=1SV=1	sp|P06709|BIRA_ECOLIBifunctionalligase/repressorBirAOS=Escherichiacoli(strainK12)GN=birAPE=1SV=1	sp|P06709|BIRA_ECOLIBifunctionalligase/repressorBirAOS=Escherichiacoli(strainK12)GN=birAPE=1SV=1	MSMS	12_J3_	BirADtBio100_DtDigest	660.339	2	660.335	1318.66	NaN	NaN	NaN	NaN	NaN	NaN	NaN	NaN	109.65	1	109.65	109.15	110.15	-7.6294e-06								0	0	0	0.01	1	13383
DWGVDVFTVPGK	12	Unmodified	_DWGVDVFTVPGK_					0	0	0	0	0	sp|P06709|BIRA_ECOLIBifunctionalligase/repressorBirAOS=Escherichiacoli(strainK12)GN=birAPE=1SV=1	sp|P06709|BIRA_ECOLIBifunctionalligase/repressorBirAOS=Escherichiacoli(strainK12)GN=birAPE=1SV=1	sp|P06709|BIRA_ECOLIBifunctionalligase/repressorBirAOS=Escherichiacoli(strainK12)GN=birAPE=1SV=1	MSMS	12_J3_	BirADtBio100_DtDigest	660.335	2	660.335	1318.66	NaN	NaN	NaN	NaN	NaN	NaN	NaN	NaN	111.73	1	111.73	111.23	112.23	0								0	0	0	0.01	1	13583
DWGVDVFTVPGK	12	Unmodified	_DWGVDVFTVPGK_					0	0	0	0	0	sp|P06709|BIRA_ECOLIBifunctionalligase/repressorBirAOS=Escherichiacoli(strainK12)GN=birAPE=1SV=1	sp|P06709|BIRA_ECOLIBifunctionalligase/repressorBirAOS=Escherichiacoli(strainK12)GN=birAPE=1SV=1	sp|P06709|BIRA_ECOLIBifunctionalligase/repressorBirAOS=Escherichiacoli(strainK12)GN=birAPE=1SV=1	MSMS	12_J3_	BirADtBio100_DtDigest	660.336	2	660.335	1318.66	NaN	NaN	NaN	NaN	NaN	NaN	NaN	NaN	112.85	1	112.85	112.35	113.35	0								0	0	0	0.01	1	13684
DWGVDVFTVPGK	12	Unmodified	_DWGVDVFTVPGK_					0	0	0	0	0	sp|P06709|BIRA_ECOLIBifunctionalligase/repressorBirAOS=Escherichiacoli(strainK12)GN=birAPE=1SV=1	sp|P06709|BIRA_ECOLIBifunctionalligase/repressorBirAOS=Escherichiacoli(strainK12)GN=birAPE=1SV=1	sp|P06709|BIRA_ECOLIBifunctionalligase/repressorBirAOS=Escherichiacoli(strainK12)GN=birAPE=1SV=1	MSMS	12_J3_	BirADtBio100_DtDigest	660.336	2	660.335	1318.66	NaN	NaN	NaN	NaN	NaN	NaN	NaN	NaN	113.85	1	113.85	113.35	114.35	0								0	0	0	0.01	1	13774
DWGVDVFTVPGK	12	Unmodified	_DWGVDVFTVPGK_					0	0	0	0	0	sp|P06709|BIRA_ECOLIBifunctionalligase/repressorBirAOS=Escherichiacoli(strainK12)GN=birAPE=1SV=1	sp|P06709|BIRA_ECOLIBifunctionalligase/repressorBirAOS=Escherichiacoli(strainK12)GN=birAPE=1SV=1	sp|P06709|BIRA_ECOLIBifunctionalligase/repressorBirAOS=Escherichiacoli(strainK12)GN=birAPE=1SV=1	MULTI-SECPEP	12_J3_	BirADtBio100_DtDigest	661.67	2	660.335	1318.66	25486.6	1.1764	0.00077679	0.65835	0.00043473	1.8347	0.0012115	660.335	81.071	0.91844	81.071	80.71	81.628	0					27	19	2	0	0	0	0.01	1	9750
DWGVDVFTVPGKGYSLPEPIQLLNAK	26	Unmodified	_DWGVDVFTVPGKGYSLPEPIQLLNAK_					0	0	0	0	1	sp|P06709|BIRA_ECOLIBifunctionalligase/repressorBirAOS=Escherichiacoli(strainK12)GN=birAPE=1SV=1	sp|P06709|BIRA_ECOLIBifunctionalligase/repressorBirAOS=Escherichiacoli(strainK12)GN=birAPE=1SV=1	sp|P06709|BIRA_ECOLIBifunctionalligase/repressorBirAOS=Escherichiacoli(strainK12)GN=birAPE=1SV=1	MULTI-MSMS	12_J3_	BirADtBio100_DtDigest	948.841	3	948.504	2842.49	21815.2	2.6095	0.0024751	0.11912	0.00011298	2.7286	0.0025881	948.838	102.74	0.82121	102.74	102.26	103.08	0					63	15	5	0	0	0	0.01	1	12541
EIFGISR	7	Unmodified	_EIFGISR_					0	0	0	0	0	sp|P06709|BIRA_ECOLIBifunctionalligase/repressorBirAOS=Escherichiacoli(strainK12)GN=birAPE=1SV=1	sp|P06709|BIRA_ECOLIBifunctionalligase/repressorBirAOS=Escherichiacoli(strainK12)GN=birAPE=1SV=1	sp|P06709|BIRA_ECOLIBifunctionalligase/repressorBirAOS=Escherichiacoli(strainK12)GN=birAPE=1SV=1	MULTI-SECPEP	12_J3_	BirADtBio100_DtDigest	410.228	2	411.229	820.444	32849.3	1.6572	0.00068149	0.1377	5.6624e-05	1.7949	0.00073812	411.229	49.022	1.7545	49.022	48.232	49.986	0					90	59	2	0	0	0	0.01	1	5257
GIDKQGALLLEQDGIIK	17	Unmodified	_GIDKQGALLLEQDGIIK_					0	0	0	0	1	sp|P06709|BIRA_ECOLIBifunctionalligase/repressorBirAOS=Escherichiacoli(strainK12)GN=birAPE=1SV=1	sp|P06709|BIRA_ECOLIBifunctionalligase/repressorBirAOS=Escherichiacoli(strainK12)GN=birAPE=1SV=1	sp|P06709|BIRA_ECOLIBifunctionalligase/repressorBirAOS=Escherichiacoli(strainK12)GN=birAPE=1SV=1	MULTI-MSMS	12_J3_	BirADtBio100_DtDigest	604.349	3	604.347	1810.02	27365.4	1.2267	0.00074138	0.50239	0.00030362	1.7291	0.001045	604.681	80.681	0.92513	80.681	80.229	81.154	0					48	19	3	0	0	0	0.01	1	9611
GIDKQGALLLEQDGIIKPWMGGEISLR	27	Unmodified	_GIDKQGALLLEQDGIIKPWMGGEISLR_					0	0	0	0	2	sp|P06709|BIRA_ECOLIBifunctionalligase/repressorBirAOS=Escherichiacoli(strainK12)GN=birAPE=1SV=1	sp|P06709|BIRA_ECOLIBifunctionalligase/repressorBirAOS=Escherichiacoli(strainK12)GN=birAPE=1SV=1	sp|P06709|BIRA_ECOLIBifunctionalligase/repressorBirAOS=Escherichiacoli(strainK12)GN=birAPE=1SV=1	MULTI-MSMS	12_J3_	BirADtBio100_DtDigest	735.656	4	735.152	2936.58	24529.5	1.4956	0.0010995	0.11167	8.2091e-05	1.6073	0.0011816	735.403	97.887	2.8906	97.887	96.937	99.827	0					419	86	8	0	0	0	0.01	4	11830
GIDKQGALLLEQDGIIKPWMGGEISLR	27	Unmodified	_GIDKQGALLLEQDGIIKPWMGGEISLR_					0	0	0	0	2	sp|P06709|BIRA_ECOLIBifunctionalligase/repressorBirAOS=Escherichiacoli(strainK12)GN=birAPE=1SV=1	sp|P06709|BIRA_ECOLIBifunctionalligase/repressorBirAOS=Escherichiacoli(strainK12)GN=birAPE=1SV=1	sp|P06709|BIRA_ECOLIBifunctionalligase/repressorBirAOS=Escherichiacoli(strainK12)GN=birAPE=1SV=1	MULTI-MSMS	12_J3_	BirADtBio100_DtDigest	980.205	3	979.867	2936.58	21288	2.6281	0.0025752	0.19151	0.00018765	2.8196	0.0027628	980.202	97.881	1.3567	97.881	97.157	98.514	0					175	37	6	0	0	0	0.01	2	11864
GIDKQGALLLEQDGIIKPWMGGEISLR	27	Unmodified	_GIDKQGALLLEQDGIIKPWMGGEISLR_					0	0	0	0	2	sp|P06709|BIRA_ECOLIBifunctionalligase/repressorBirAOS=Escherichiacoli(strainK12)GN=birAPE=1SV=1	sp|P06709|BIRA_ECOLIBifunctionalligase/repressorBirAOS=Escherichiacoli(strainK12)GN=birAPE=1SV=1	sp|P06709|BIRA_ECOLIBifunctionalligase/repressorBirAOS=Escherichiacoli(strainK12)GN=birAPE=1SV=1	MULTI-MSMS	12_J3_	BirADtBio100_DtDigest	980.538	3	979.867	2936.58	21373.3	2.5905	0.0025384	0.94607	0.00092702	3.5366	0.0034654	980.203	99.169	1.3983	99.169	98.312	99.71	0					156	40	5	0	0	0	0.01	1	12070
GIDKQGALLLEQDGIIKPWMGGEISLR	27	Unmodified	_GIDKQGALLLEQDGIIKPWMGGEISLR_					0	0	0	0	2	sp|P06709|BIRA_ECOLIBifunctionalligase/repressorBirAOS=Escherichiacoli(strainK12)GN=birAPE=1SV=1	sp|P06709|BIRA_ECOLIBifunctionalligase/repressorBirAOS=Escherichiacoli(strainK12)GN=birAPE=1SV=1	sp|P06709|BIRA_ECOLIBifunctionalligase/repressorBirAOS=Escherichiacoli(strainK12)GN=birAPE=1SV=1	MULTI-SECPEP	12_J3_	BirADtBio100_DtDigest	734.597	4	735.152	2936.58	21410	1.5767	0.0011591	-3.3182	-0.0024394	-1.7415	-0.0012802	735.399	101.58	0.54324	101.58	101.19	101.73	0					63	21	4	0	0	0	0.01	1	12397
GYSLPEPIQLLNAK	14	Unmodified	_GYSLPEPIQLLNAK_					0	0	0	0	0	sp|P06709|BIRA_ECOLIBifunctionalligase/repressorBirAOS=Escherichiacoli(strainK12)GN=birAPE=1SV=1	sp|P06709|BIRA_ECOLIBifunctionalligase/repressorBirAOS=Escherichiacoli(strainK12)GN=birAPE=1SV=1	sp|P06709|BIRA_ECOLIBifunctionalligase/repressorBirAOS=Escherichiacoli(strainK12)GN=birAPE=1SV=1	MULTI-MSMS	12_J3_	BirADtBio100_DtDigest	514.956	3	514.956	1541.85	29741.5	1.9356	0.00099677	0.28713	0.00014786	2.2228	0.0011446	515.29	86.939	1.0221	86.939	86.51	87.532	0					31	25	2	0	0	0	0.01	1	10456
GYSLPEPIQLLNAK	14	Unmodified	_GYSLPEPIQLLNAK_					0	0	0	0	0	sp|P06709|BIRA_ECOLIBifunctionalligase/repressorBirAOS=Escherichiacoli(strainK12)GN=birAPE=1SV=1	sp|P06709|BIRA_ECOLIBifunctionalligase/repressorBirAOS=Escherichiacoli(strainK12)GN=birAPE=1SV=1	sp|P06709|BIRA_ECOLIBifunctionalligase/repressorBirAOS=Escherichiacoli(strainK12)GN=birAPE=1SV=1	MULTI-MSMS	12_J3_	BirADtBio100_DtDigest	772.425	2	771.93	1541.85	23917.1	2.0275	0.0015651	1.1936	0.0009214	3.2211	0.0024865	771.932	92.047	4.6539	92.047	90.758	95.412	0					543	146	6	0	0	0	0.01	4	10994
GYSLPEPIQLLNAK	14	Unmodified	_GYSLPEPIQLLNAK_					0	0	0	0	0	sp|P06709|BIRA_ECOLIBifunctionalligase/repressorBirAOS=Escherichiacoli(strainK12)GN=birAPE=1SV=1	sp|P06709|BIRA_ECOLIBifunctionalligase/repressorBirAOS=Escherichiacoli(strainK12)GN=birAPE=1SV=1	sp|P06709|BIRA_ECOLIBifunctionalligase/repressorBirAOS=Escherichiacoli(strainK12)GN=birAPE=1SV=1	MULTI-MSMS	12_J3_	BirADtBio100_DtDigest	514.957	3	514.956	1541.85	29403	2.0825	0.0010724	0.43268	0.00022281	2.5152	0.0012952	514.956	91.969	2.6852	91.969	91.036	93.721	0					287	84	4	0	0	0	0.01	3	11055
GYSLPEPIQLLNAK	14	Unmodified	_GYSLPEPIQLLNAK_					0	0	0	0	0	sp|P06709|BIRA_ECOLIBifunctionalligase/repressorBirAOS=Escherichiacoli(strainK12)GN=birAPE=1SV=1	sp|P06709|BIRA_ECOLIBifunctionalligase/repressorBirAOS=Escherichiacoli(strainK12)GN=birAPE=1SV=1	sp|P06709|BIRA_ECOLIBifunctionalligase/repressorBirAOS=Escherichiacoli(strainK12)GN=birAPE=1SV=1	MULTI-MSMS	12_J3_	BirADtBio100_DtDigest	771.937	2	771.93	1541.85	23469	1.8937	0.0014618	2.3515	0.0018152	4.2452	0.003277	772.433	105	0.79695	105	104.45	105.25	-7.6294e-06					40	24	2	0	0	0	0.01	1	12799
GYSLPEPIQLLNAK	14	Unmodified	_GYSLPEPIQLLNAK_					0	0	0	0	0	sp|P06709|BIRA_ECOLIBifunctionalligase/repressorBirAOS=Escherichiacoli(strainK12)GN=birAPE=1SV=1	sp|P06709|BIRA_ECOLIBifunctionalligase/repressorBirAOS=Escherichiacoli(strainK12)GN=birAPE=1SV=1	sp|P06709|BIRA_ECOLIBifunctionalligase/repressorBirAOS=Escherichiacoli(strainK12)GN=birAPE=1SV=1	MULTI-MSMS	12_J3_	BirADtBio100_DtDigest	771.934	2	771.93	1541.85	24082.1	1.9777	0.0015266	0.40894	0.00031567	2.3866	0.0018423	771.931	106.54	1.278	106.54	106.1	107.38	0					87	52	2	0	0	0	0.01	2	13020
GYSLPEPIQLLNAK	14	Unmodified	_GYSLPEPIQLLNAK_					0	0	0	0	0	sp|P06709|BIRA_ECOLIBifunctionalligase/repressorBirAOS=Escherichiacoli(strainK12)GN=birAPE=1SV=1	sp|P06709|BIRA_ECOLIBifunctionalligase/repressorBirAOS=Escherichiacoli(strainK12)GN=birAPE=1SV=1	sp|P06709|BIRA_ECOLIBifunctionalligase/repressorBirAOS=Escherichiacoli(strainK12)GN=birAPE=1SV=1	MULTI-MSMS	12_J3_	BirADtBio100_DtDigest	771.931	2	771.93	1541.85	24148.5	2.015	0.0015555	1.0188	0.00078641	3.0338	0.0023419	771.931	107.51	0.96824	107.51	107.18	108.15	0					56	42	2	0	0	0	0.01	1	13199
GYSLPEPIQLLNAK	14	Unmodified	_GYSLPEPIQLLNAK_					0	0	0	0	0	sp|P06709|BIRA_ECOLIBifunctionalligase/repressorBirAOS=Escherichiacoli(strainK12)GN=birAPE=1SV=1	sp|P06709|BIRA_ECOLIBifunctionalligase/repressorBirAOS=Escherichiacoli(strainK12)GN=birAPE=1SV=1	sp|P06709|BIRA_ECOLIBifunctionalligase/repressorBirAOS=Escherichiacoli(strainK12)GN=birAPE=1SV=1	MULTI-MSMS	12_J3_	BirADtBio100_DtDigest	771.934	2	771.93	1541.85	23873.3	2.0692	0.0015973	1.4381	0.0011101	3.5074	0.0027075	772.432	108.66	0.78109	108.66	108.47	109.25	0					64	36	3	0	0	0	0.01	1	13284
GYSLPEPIQLLNAK	14	Unmodified	_GYSLPEPIQLLNAK_					0	0	0	0	0	sp|P06709|BIRA_ECOLIBifunctionalligase/repressorBirAOS=Escherichiacoli(strainK12)GN=birAPE=1SV=1	sp|P06709|BIRA_ECOLIBifunctionalligase/repressorBirAOS=Escherichiacoli(strainK12)GN=birAPE=1SV=1	sp|P06709|BIRA_ECOLIBifunctionalligase/repressorBirAOS=Escherichiacoli(strainK12)GN=birAPE=1SV=1	MULTI-MSMS	12_J3_	BirADtBio100_DtDigest	771.933	2	771.93	1541.85	23873.2	2.1148	0.0016325	-0.28423	-0.00021941	1.8306	0.0014131	771.93	109.58	0.85178	109.58	109.45	110.3	0					68	46	2	0	0	0	0.01	1	13373
GYSLPEPIQLLNAK	14	Unmodified	_GYSLPEPIQLLNAK_					0	0	0	0	0	sp|P06709|BIRA_ECOLIBifunctionalligase/repressorBirAOS=Escherichiacoli(strainK12)GN=birAPE=1SV=1	sp|P06709|BIRA_ECOLIBifunctionalligase/repressorBirAOS=Escherichiacoli(strainK12)GN=birAPE=1SV=1	sp|P06709|BIRA_ECOLIBifunctionalligase/repressorBirAOS=Escherichiacoli(strainK12)GN=birAPE=1SV=1	MULTI-MSMS	12_J3_	BirADtBio100_DtDigest	771.933	2	771.93	1541.85	22217.6	2.2199	0.0017136	0.40811	0.00031503	2.628	0.0020286	772.432	112.15	0.29361	112.15	112.05	112.34	0					35	23	2	0	0	0	0.01	1	13632
GYSLPEPIQLLNAK	14	Unmodified	_GYSLPEPIQLLNAK_					0	0	0	0	0	sp|P06709|BIRA_ECOLIBifunctionalligase/repressorBirAOS=Escherichiacoli(strainK12)GN=birAPE=1SV=1	sp|P06709|BIRA_ECOLIBifunctionalligase/repressorBirAOS=Escherichiacoli(strainK12)GN=birAPE=1SV=1	sp|P06709|BIRA_ECOLIBifunctionalligase/repressorBirAOS=Escherichiacoli(strainK12)GN=birAPE=1SV=1	MULTI-MSMS	12_J3_	BirADtBio100_DtDigest	771.934	2	771.93	1541.85	22795.7	2.2651	0.0017485	-0.33364	-0.00025755	1.9315	0.001491	771.93	113.13	0.4669	113.13	112.96	113.43	0					51	35	2	0	0	0	0.01	1	13707
GYSLPEPIQLLNAK	14	Unmodified	_GYSLPEPIQLLNAK_					0	0	0	0	0	sp|P06709|BIRA_ECOLIBifunctionalligase/repressorBirAOS=Escherichiacoli(strainK12)GN=birAPE=1SV=1	sp|P06709|BIRA_ECOLIBifunctionalligase/repressorBirAOS=Escherichiacoli(strainK12)GN=birAPE=1SV=1	sp|P06709|BIRA_ECOLIBifunctionalligase/repressorBirAOS=Escherichiacoli(strainK12)GN=birAPE=1SV=1	MSMS	12_J3_	BirADtBio100_DtDigest	771.932	2	771.93	1541.85	NaN	NaN	NaN	NaN	NaN	NaN	NaN	NaN	111.5	1	111.5	111	112	0								0	0	0	0.01	1	13562
HIQTLRDWGVDVFTVPGK	18	Unmodified	_HIQTLRDWGVDVFTVPGK_					0	0	0	0	1	sp|P06709|BIRA_ECOLIBifunctionalligase/repressorBirAOS=Escherichiacoli(strainK12)GN=birAPE=1SV=1	sp|P06709|BIRA_ECOLIBifunctionalligase/repressorBirAOS=Escherichiacoli(strainK12)GN=birAPE=1SV=1	sp|P06709|BIRA_ECOLIBifunctionalligase/repressorBirAOS=Escherichiacoli(strainK12)GN=birAPE=1SV=1	MULTI-MSMS	12_J3_	BirADtBio100_DtDigest	690.372	3	690.037	2067.09	25407.7	1.665	0.0011489	0.50213	0.00034649	2.1671	0.0014954	690.372	92.041	1.9236	92.041	91.197	93.12	0					298	60	6	0	0	0	0.01	2	11080
HIQTLRDWGVDVFTVPGK	18	Unmodified	_HIQTLRDWGVDVFTVPGK_					0	0	0	0	1	sp|P06709|BIRA_ECOLIBifunctionalligase/repressorBirAOS=Escherichiacoli(strainK12)GN=birAPE=1SV=1	sp|P06709|BIRA_ECOLIBifunctionalligase/repressorBirAOS=Escherichiacoli(strainK12)GN=birAPE=1SV=1	sp|P06709|BIRA_ECOLIBifunctionalligase/repressorBirAOS=Escherichiacoli(strainK12)GN=birAPE=1SV=1	MULTI-MSMS	12_J3_	BirADtBio100_DtDigest	518.031	4	517.78	2067.09	29482.2	2.0779	0.0010759	-0.080802	-4.1838e-05	1.9971	0.0010341	518.031	91.987	1.9099	91.987	91.171	93.081	0					273	60	6	0	0	0	0.01	2	11081
HIQTLRDWGVDVFTVPGK	18	Unmodified	_HIQTLRDWGVDVFTVPGK_					0	0	0	0	1	sp|P06709|BIRA_ECOLIBifunctionalligase/repressorBirAOS=Escherichiacoli(strainK12)GN=birAPE=1SV=1	sp|P06709|BIRA_ECOLIBifunctionalligase/repressorBirAOS=Escherichiacoli(strainK12)GN=birAPE=1SV=1	sp|P06709|BIRA_ECOLIBifunctionalligase/repressorBirAOS=Escherichiacoli(strainK12)GN=birAPE=1SV=1	MULTI-MSMS	12_J3_	BirADtBio100_DtDigest	1035.06	2	1034.55	2067.09	20740.1	3.2463	0.0033585	0.41981	0.00043431	3.6661	0.0037928	1035.05	92.043	1.1599	92.043	91.483	92.643	0					125	38	4	0	0	0	0.01	2	11107
KDNTVPLK	8	Unmodified	_KDNTVPLK_					0	0	0	0	1	sp|P06709|BIRA_ECOLIBifunctionalligase/repressorBirAOS=Escherichiacoli(strainK12)GN=birAPE=1SV=1	sp|P06709|BIRA_ECOLIBifunctionalligase/repressorBirAOS=Escherichiacoli(strainK12)GN=birAPE=1SV=1	sp|P06709|BIRA_ECOLIBifunctionalligase/repressorBirAOS=Escherichiacoli(strainK12)GN=birAPE=1SV=1	MULTI-MSMS	12_J3_	BirADtBio100_DtDigest	457.769	2	457.769	913.523	30958.3	1.3762	0.00062999	-0.80142	-0.00036686	0.5748	0.00026313	457.768	47.695	3.356	47.695	46.63	49.986	0					155	115	2	0	0	0	0.01	2	4974
KDNTVPLK	8	Unmodified	_KDNTVPLK_					0	0	0	0	1	sp|P06709|BIRA_ECOLIBifunctionalligase/repressorBirAOS=Escherichiacoli(strainK12)GN=birAPE=1SV=1	sp|P06709|BIRA_ECOLIBifunctionalligase/repressorBirAOS=Escherichiacoli(strainK12)GN=birAPE=1SV=1	sp|P06709|BIRA_ECOLIBifunctionalligase/repressorBirAOS=Escherichiacoli(strainK12)GN=birAPE=1SV=1	MSMS	12_J3_	BirADtBio100_DtDigest	457.769	2	457.769	913.523	NaN	NaN	NaN	NaN	NaN	NaN	NaN	NaN	36.881	1	36.881	36.381	37.381	0								0	0	0	0.01	1	3635
KDNTVPLK	8	Unmodified	_KDNTVPLK_					0	0	0	0	1	sp|P06709|BIRA_ECOLIBifunctionalligase/repressorBirAOS=Escherichiacoli(strainK12)GN=birAPE=1SV=1	sp|P06709|BIRA_ECOLIBifunctionalligase/repressorBirAOS=Escherichiacoli(strainK12)GN=birAPE=1SV=1	sp|P06709|BIRA_ECOLIBifunctionalligase/repressorBirAOS=Escherichiacoli(strainK12)GN=birAPE=1SV=1	MSMS	12_J3_	BirADtBio100_DtDigest	457.77	2	457.769	913.523	NaN	NaN	NaN	NaN	NaN	NaN	NaN	NaN	46.58	1	46.58	46.08	47.08	0								0	0	0	0.01	1	4871
KLAGILVELTGK	12	Unmodified	_KLAGILVELTGK_					0	0	0	0	1	sp|P06709|BIRA_ECOLIBifunctionalligase/repressorBirAOS=Escherichiacoli(strainK12)GN=birAPE=1SV=1	sp|P06709|BIRA_ECOLIBifunctionalligase/repressorBirAOS=Escherichiacoli(strainK12)GN=birAPE=1SV=1	sp|P06709|BIRA_ECOLIBifunctionalligase/repressorBirAOS=Escherichiacoli(strainK12)GN=birAPE=1SV=1	MULTI-MSMS	12_J3_	BirADtBio100_DtDigest	414.601	3	414.599	1240.78	32821.1	2.4978	0.0010356	-0.25943	-0.00010756	2.2383	0.00092801	414.599	87.028	2.2621	87.028	85.871	88.133	0					185	64	4	0	0	0	0.01	3	10370
KLAGILVELTGK	12	Unmodified	_KLAGILVELTGK_					0	0	0	0	1	sp|P06709|BIRA_ECOLIBifunctionalligase/repressorBirAOS=Escherichiacoli(strainK12)GN=birAPE=1SV=1	sp|P06709|BIRA_ECOLIBifunctionalligase/repressorBirAOS=Escherichiacoli(strainK12)GN=birAPE=1SV=1	sp|P06709|BIRA_ECOLIBifunctionalligase/repressorBirAOS=Escherichiacoli(strainK12)GN=birAPE=1SV=1	MULTI-MSMS	12_J3_	BirADtBio100_DtDigest	621.397	2	621.395	1240.78	26738.1	1.3421	0.00083397	0.77598	0.00048219	2.1181	0.0013162	621.395	86.954	1.8394	86.954	86.121	87.96	0					131	50	4	0	0	0	0.01	1	10406
KLAGILVELTGK	12	Unmodified	_KLAGILVELTGK_					0	0	0	0	1	sp|P06709|BIRA_ECOLIBifunctionalligase/repressorBirAOS=Escherichiacoli(strainK12)GN=birAPE=1SV=1	sp|P06709|BIRA_ECOLIBifunctionalligase/repressorBirAOS=Escherichiacoli(strainK12)GN=birAPE=1SV=1	sp|P06709|BIRA_ECOLIBifunctionalligase/repressorBirAOS=Escherichiacoli(strainK12)GN=birAPE=1SV=1	MULTI-MSMS	12_J3_	BirADtBio100_DtDigest	414.6	3	414.599	1240.78	32580.7	2.6149	0.0010841	0.52872	0.00021921	3.1436	0.0013033	414.6	90.11	3.8541	90.11	88.789	92.643	-7.6294e-06					569	139	5	0	0	0	0.01	5	10789
KLAGILVELTGK	12	Unmodified	_KLAGILVELTGK_					0	0	0	0	1	sp|P06709|BIRA_ECOLIBifunctionalligase/repressorBirAOS=Escherichiacoli(strainK12)GN=birAPE=1SV=1	sp|P06709|BIRA_ECOLIBifunctionalligase/repressorBirAOS=Escherichiacoli(strainK12)GN=birAPE=1SV=1	sp|P06709|BIRA_ECOLIBifunctionalligase/repressorBirAOS=Escherichiacoli(strainK12)GN=birAPE=1SV=1	MSMS	12_J3_	BirADtBio100_DtDigest	621.394	2	621.395	1240.78	NaN	NaN	NaN	NaN	NaN	NaN	NaN	NaN	102.51	1	102.51	102.01	103.01	0								0	0	0	0.01	1	12528
KLGADKVR	8	Unmodified	_KLGADKVR_					0	0	0	0	2	sp|P06709|BIRA_ECOLIBifunctionalligase/repressorBirAOS=Escherichiacoli(strainK12)GN=birAPE=1SV=1	sp|P06709|BIRA_ECOLIBifunctionalligase/repressorBirAOS=Escherichiacoli(strainK12)GN=birAPE=1SV=1	sp|P06709|BIRA_ECOLIBifunctionalligase/repressorBirAOS=Escherichiacoli(strainK12)GN=birAPE=1SV=1	MULTI-SECPEP	12_J3_	BirADtBio100_DtDigest	442.783	2	443.777	885.54	23755.2	1.4914	0.00066186	-1.2174	-0.00054026	0.274	0.0001216	443.777	49.809	4.6481	49.809	47.391	52.039	0					193	143	2	0	0	0	0.01	1	4977
KWFSPFGANLYLSMFWR	17	Unmodified	_KWFSPFGANLYLSMFWR_					0	0	0	0	1	sp|P06709|BIRA_ECOLIBifunctionalligase/repressorBirAOS=Escherichiacoli(strainK12)GN=birAPE=1SV=1	sp|P06709|BIRA_ECOLIBifunctionalligase/repressorBirAOS=Escherichiacoli(strainK12)GN=birAPE=1SV=1	sp|P06709|BIRA_ECOLIBifunctionalligase/repressorBirAOS=Escherichiacoli(strainK12)GN=birAPE=1SV=1	MULTI-MSMS	12_J3_	BirADtBio100_DtDigest	538.527	4	538.272	2149.06	29909.9	1.5939	0.00085796	3.8253	0.0020591	5.4193	0.002917	538.525	99.838	0.46409	99.838	99.633	100.1	0					18	13	2	0	0	0	0.01	1	12196
KWFSPFGANLYLSMFWR	17	Unmodified	_KWFSPFGANLYLSMFWR_					0	0	0	0	1	sp|P06709|BIRA_ECOLIBifunctionalligase/repressorBirAOS=Escherichiacoli(strainK12)GN=birAPE=1SV=1	sp|P06709|BIRA_ECOLIBifunctionalligase/repressorBirAOS=Escherichiacoli(strainK12)GN=birAPE=1SV=1	sp|P06709|BIRA_ECOLIBifunctionalligase/repressorBirAOS=Escherichiacoli(strainK12)GN=birAPE=1SV=1	MULTI-SECPEP	12_J3_	BirADtBio100_DtDigest	716.377	3	717.361	2149.06	25615	1.42	0.0010187	3.9296	0.0028189	5.3496	0.0038376	717.698	99.841	0.72375	99.841	99.477	100.2	0					48	23	3	0	0	0	0.01	1	12151
LAGILVELTGK	11	Unmodified	_LAGILVELTGK_					0	0	0	0	0	sp|P06709|BIRA_ECOLIBifunctionalligase/repressorBirAOS=Escherichiacoli(strainK12)GN=birAPE=1SV=1	sp|P06709|BIRA_ECOLIBifunctionalligase/repressorBirAOS=Escherichiacoli(strainK12)GN=birAPE=1SV=1	sp|P06709|BIRA_ECOLIBifunctionalligase/repressorBirAOS=Escherichiacoli(strainK12)GN=birAPE=1SV=1	MULTI-MSMS	12_J3_	BirADtBio100_DtDigest	557.348	2	557.348	1112.68	28363.8	1.5686	0.00087424	0.32271	0.00017986	1.8913	0.0010541	557.348	82.954	0.73467	82.954	82.719	83.453	0					23	16	2	0	0	0	0.01	1	9958
LAGILVELTGK	11	Unmodified	_LAGILVELTGK_					0	0	0	0	0	sp|P06709|BIRA_ECOLIBifunctionalligase/repressorBirAOS=Escherichiacoli(strainK12)GN=birAPE=1SV=1	sp|P06709|BIRA_ECOLIBifunctionalligase/repressorBirAOS=Escherichiacoli(strainK12)GN=birAPE=1SV=1	sp|P06709|BIRA_ECOLIBifunctionalligase/repressorBirAOS=Escherichiacoli(strainK12)GN=birAPE=1SV=1	MULTI-MSMS	12_J3_	BirADtBio100_DtDigest	557.347	2	557.348	1112.68	28208.3	1.7937	0.00099969	0.73286	0.00040846	2.5265	0.0014081	557.348	89.636	4.4212	89.636	88.439	92.86	7.6294e-06					528	157	5	0	0	0	0.01	6	10700
LAGILVELTGK	11	Unmodified	_LAGILVELTGK_					0	0	0	0	0	sp|P06709|BIRA_ECOLIBifunctionalligase/repressorBirAOS=Escherichiacoli(strainK12)GN=birAPE=1SV=1	sp|P06709|BIRA_ECOLIBifunctionalligase/repressorBirAOS=Escherichiacoli(strainK12)GN=birAPE=1SV=1	sp|P06709|BIRA_ECOLIBifunctionalligase/repressorBirAOS=Escherichiacoli(strainK12)GN=birAPE=1SV=1	MSMS	12_J3_	BirADtBio100_DtDigest	557.347	2	557.348	1112.68	NaN	NaN	NaN	NaN	NaN	NaN	NaN	NaN	94.143	1	94.143	93.643	94.643	7.6294e-06								0	0	0	0.01	1	11443
LAGILVELTGK	11	Unmodified	_LAGILVELTGK_					0	0	0	0	0	sp|P06709|BIRA_ECOLIBifunctionalligase/repressorBirAOS=Escherichiacoli(strainK12)GN=birAPE=1SV=1	sp|P06709|BIRA_ECOLIBifunctionalligase/repressorBirAOS=Escherichiacoli(strainK12)GN=birAPE=1SV=1	sp|P06709|BIRA_ECOLIBifunctionalligase/repressorBirAOS=Escherichiacoli(strainK12)GN=birAPE=1SV=1	MSMS	12_J3_	BirADtBio100_DtDigest	557.348	2	557.348	1112.68	NaN	NaN	NaN	NaN	NaN	NaN	NaN	NaN	104.26	1	104.26	103.76	104.76	0								0	0	0	0.01	1	12761
LAGILVELTGK	11	Unmodified	_LAGILVELTGK_					0	0	0	0	0	sp|P06709|BIRA_ECOLIBifunctionalligase/repressorBirAOS=Escherichiacoli(strainK12)GN=birAPE=1SV=1	sp|P06709|BIRA_ECOLIBifunctionalligase/repressorBirAOS=Escherichiacoli(strainK12)GN=birAPE=1SV=1	sp|P06709|BIRA_ECOLIBifunctionalligase/repressorBirAOS=Escherichiacoli(strainK12)GN=birAPE=1SV=1	MSMS	12_J3_	BirADtBio100_DtDigest	557.348	2	557.348	1112.68	NaN	NaN	NaN	NaN	NaN	NaN	NaN	NaN	105.7	1	105.7	105.2	106.2	0								0	0	0	0.01	1	12941
LAGILVELTGK	11	Unmodified	_LAGILVELTGK_					0	0	0	0	0	sp|P06709|BIRA_ECOLIBifunctionalligase/repressorBirAOS=Escherichiacoli(strainK12)GN=birAPE=1SV=1	sp|P06709|BIRA_ECOLIBifunctionalligase/repressorBirAOS=Escherichiacoli(strainK12)GN=birAPE=1SV=1	sp|P06709|BIRA_ECOLIBifunctionalligase/repressorBirAOS=Escherichiacoli(strainK12)GN=birAPE=1SV=1	MSMS	12_J3_	BirADtBio100_DtDigest	557.347	2	557.348	1112.68	NaN	NaN	NaN	NaN	NaN	NaN	NaN	NaN	106.79	1	106.79	106.29	107.29	7.6294e-06								0	0	0	0.01	1	13070
LAGILVELTGK	11	Unmodified	_LAGILVELTGK_					0	0	0	0	0	sp|P06709|BIRA_ECOLIBifunctionalligase/repressorBirAOS=Escherichiacoli(strainK12)GN=birAPE=1SV=1	sp|P06709|BIRA_ECOLIBifunctionalligase/repressorBirAOS=Escherichiacoli(strainK12)GN=birAPE=1SV=1	sp|P06709|BIRA_ECOLIBifunctionalligase/repressorBirAOS=Escherichiacoli(strainK12)GN=birAPE=1SV=1	MSMS	12_J3_	BirADtBio100_DtDigest	557.35	2	557.348	1112.68	NaN	NaN	NaN	NaN	NaN	NaN	NaN	NaN	107.86	1	107.86	107.36	108.36	0								0	0	0	0.01	1	13186
LAGILVELTGK	11	Unmodified	_LAGILVELTGK_					0	0	0	0	0	sp|P06709|BIRA_ECOLIBifunctionalligase/repressorBirAOS=Escherichiacoli(strainK12)GN=birAPE=1SV=1	sp|P06709|BIRA_ECOLIBifunctionalligase/repressorBirAOS=Escherichiacoli(strainK12)GN=birAPE=1SV=1	sp|P06709|BIRA_ECOLIBifunctionalligase/repressorBirAOS=Escherichiacoli(strainK12)GN=birAPE=1SV=1	MSMS	12_J3_	BirADtBio100_DtDigest	557.349	2	557.348	1112.68	NaN	NaN	NaN	NaN	NaN	NaN	NaN	NaN	108.99	1	108.99	108.49	109.49	0								0	0	0	0.01	1	13310
LDNFINRPVK	10	Unmodified	_LDNFINRPVK_					0	0	0	0	1	sp|P06709|BIRA_ECOLIBifunctionalligase/repressorBirAOS=Escherichiacoli(strainK12)GN=birAPE=1SV=1	sp|P06709|BIRA_ECOLIBifunctionalligase/repressorBirAOS=Escherichiacoli(strainK12)GN=birAPE=1SV=1	sp|P06709|BIRA_ECOLIBifunctionalligase/repressorBirAOS=Escherichiacoli(strainK12)GN=birAPE=1SV=1	MULTI-MSMS	12_J3_	BirADtBio100_DtDigest	405.901	3	405.9	1214.68	33604.9	1.8952	0.00076926	0.13745	5.5789e-05	2.0326	0.00082504	405.9	60.411	8.7056	60.411	56.048	64.753	0					757	218	5	0	0	0	0.01	8	6238
LDNFINRPVK	10	Unmodified	_LDNFINRPVK_					0	0	0	0	1	sp|P06709|BIRA_ECOLIBifunctionalligase/repressorBirAOS=Escherichiacoli(strainK12)GN=birAPE=1SV=1	sp|P06709|BIRA_ECOLIBifunctionalligase/repressorBirAOS=Escherichiacoli(strainK12)GN=birAPE=1SV=1	sp|P06709|BIRA_ECOLIBifunctionalligase/repressorBirAOS=Escherichiacoli(strainK12)GN=birAPE=1SV=1	MULTI-MSMS	12_J3_	BirADtBio100_DtDigest	608.349	2	608.346	1214.68	27277.8	0.76497	0.00046537	0.22222	0.00013518	0.98718	0.00060055	608.346	60.631	6.3353	60.631	57.125	63.461	0					570	164	5	0	0	0	0.01	7	6305
LDNFINRPVK	10	Unmodified	_LDNFINRPVK_					0	0	0	0	1	sp|P06709|BIRA_ECOLIBifunctionalligase/repressorBirAOS=Escherichiacoli(strainK12)GN=birAPE=1SV=1	sp|P06709|BIRA_ECOLIBifunctionalligase/repressorBirAOS=Escherichiacoli(strainK12)GN=birAPE=1SV=1	sp|P06709|BIRA_ECOLIBifunctionalligase/repressorBirAOS=Escherichiacoli(strainK12)GN=birAPE=1SV=1	MSMS	12_J3_	BirADtBio100_DtDigest	405.899	3	405.9	1214.68	NaN	NaN	NaN	NaN	NaN	NaN	NaN	NaN	56.166	1	56.166	55.666	56.666	0								0	0	0	0.01	1	6133
LDNFINRPVK	10	Unmodified	_LDNFINRPVK_					0	0	0	0	1	sp|P06709|BIRA_ECOLIBifunctionalligase/repressorBirAOS=Escherichiacoli(strainK12)GN=birAPE=1SV=1	sp|P06709|BIRA_ECOLIBifunctionalligase/repressorBirAOS=Escherichiacoli(strainK12)GN=birAPE=1SV=1	sp|P06709|BIRA_ECOLIBifunctionalligase/repressorBirAOS=Escherichiacoli(strainK12)GN=birAPE=1SV=1	MULTI-SECPEP	12_J3_	BirADtBio100_DtDigest	607.972	2	608.346	1214.68	28133.3	1.1397	0.00069333	-0.7127	-0.00043357	0.427	0.00025976	608.345	78.642	1.3772	78.642	78.081	79.458	7.6294e-06					57	31	2	0	0	0	0.01	1	9321
LDNFINRPVKLIIGDKEIFGISR	23	Unmodified	_LDNFINRPVKLIIGDKEIFGISR_					0	0	0	0	3	sp|P06709|BIRA_ECOLIBifunctionalligase/repressorBirAOS=Escherichiacoli(strainK12)GN=birAPE=1SV=1	sp|P06709|BIRA_ECOLIBifunctionalligase/repressorBirAOS=Escherichiacoli(strainK12)GN=birAPE=1SV=1	sp|P06709|BIRA_ECOLIBifunctionalligase/repressorBirAOS=Escherichiacoli(strainK12)GN=birAPE=1SV=1	MULTI-SECPEP	12_J3_	BirADtBio100_DtDigest	663.886	4	665.134	2656.51	17968.7	1.262	0.00083937	-2.7903	-0.0018559	-1.5284	-0.0010166	665.383	96.586	0.42688	96.586	96.483	96.91	0					18	13	2	0	0	0	0.01	1	11777
LDNFINRPVKLIIGDKEIFGISR	23	Unmodified	_LDNFINRPVKLIIGDKEIFGISR_					0	0	0	0	3	sp|P06709|BIRA_ECOLIBifunctionalligase/repressorBirAOS=Escherichiacoli(strainK12)GN=birAPE=1SV=1	sp|P06709|BIRA_ECOLIBifunctionalligase/repressorBirAOS=Escherichiacoli(strainK12)GN=birAPE=1SV=1	sp|P06709|BIRA_ECOLIBifunctionalligase/repressorBirAOS=Escherichiacoli(strainK12)GN=birAPE=1SV=1	MULTI-SECPEP	12_J3_	BirADtBio100_DtDigest	532.782	5	532.309	2656.51	29715.1	1.7024	0.00090618	-1.7754	-0.00094508	-0.07307	-3.8896e-05	532.708	96.727	0.2664	96.727	96.607	96.873	0					8	8	2	0	0	0	0.01	1	11769
LGADKVR	7	Unmodified	_LGADKVR_					0	0	0	0	1	sp|P06709|BIRA_ECOLIBifunctionalligase/repressorBirAOS=Escherichiacoli(strainK12)GN=birAPE=1SV=1	sp|P06709|BIRA_ECOLIBifunctionalligase/repressorBirAOS=Escherichiacoli(strainK12)GN=birAPE=1SV=1	sp|P06709|BIRA_ECOLIBifunctionalligase/repressorBirAOS=Escherichiacoli(strainK12)GN=birAPE=1SV=1	MULTI-MSMS	12_J3_	BirADtBio100_DtDigest	379.731	2	379.73	757.445	35933.9	1.1106	0.00042174	1.4662	0.00055675	2.5768	0.00097849	379.73	9.5089	0.19633	9.5089	9.3895	9.5858	0					7	4	2	0	0	0	0.01	1	566
LGADKVR	7	Unmodified	_LGADKVR_					0	0	0	0	1	sp|P06709|BIRA_ECOLIBifunctionalligase/repressorBirAOS=Escherichiacoli(strainK12)GN=birAPE=1SV=1	sp|P06709|BIRA_ECOLIBifunctionalligase/repressorBirAOS=Escherichiacoli(strainK12)GN=birAPE=1SV=1	sp|P06709|BIRA_ECOLIBifunctionalligase/repressorBirAOS=Escherichiacoli(strainK12)GN=birAPE=1SV=1	MSMS	12_J3_	BirADtBio100_DtDigest	379.73	2	379.73	757.445	NaN	NaN	NaN	NaN	NaN	NaN	NaN	NaN	11.261	1	11.261	10.761	11.761	0								0	0	0	0.01	1	710
LGADKVR	7	Unmodified	_LGADKVR_					0	0	0	0	1	sp|P06709|BIRA_ECOLIBifunctionalligase/repressorBirAOS=Escherichiacoli(strainK12)GN=birAPE=1SV=1	sp|P06709|BIRA_ECOLIBifunctionalligase/repressorBirAOS=Escherichiacoli(strainK12)GN=birAPE=1SV=1	sp|P06709|BIRA_ECOLIBifunctionalligase/repressorBirAOS=Escherichiacoli(strainK12)GN=birAPE=1SV=1	MSMS	12_J3_	BirADtBio100_DtDigest	379.729	2	379.73	757.445	NaN	NaN	NaN	NaN	NaN	NaN	NaN	NaN	12.078	1	12.078	11.578	12.578	9.5367e-07								0	0	0	0.01	1	782
LIALLANGEFHSGEQLGETLGMSR	24	Unmodified	_LIALLANGEFHSGEQLGETLGMSR_					0	0	0	0	0	sp|P06709|BIRA_ECOLIBifunctionalligase/repressorBirAOS=Escherichiacoli(strainK12)GN=birAPE=1SV=1	sp|P06709|BIRA_ECOLIBifunctionalligase/repressorBirAOS=Escherichiacoli(strainK12)GN=birAPE=1SV=1	sp|P06709|BIRA_ECOLIBifunctionalligase/repressorBirAOS=Escherichiacoli(strainK12)GN=birAPE=1SV=1	MULTI-MSMS	12_J3_	BirADtBio100_DtDigest	636.829	4	636.579	2542.28	27186	1.3186	0.00083939	-1.4271	-0.00090844	-0.10847	-6.9052e-05	636.829	93.675	1.0499	93.675	93.12	94.17	0					111	31	5	0	0	0	0.01	1	11368
LIALLANGEFHSGEQLGETLGMSR	24	Unmodified	_LIALLANGEFHSGEQLGETLGMSR_					0	0	0	0	0	sp|P06709|BIRA_ECOLIBifunctionalligase/repressorBirAOS=Escherichiacoli(strainK12)GN=birAPE=1SV=1	sp|P06709|BIRA_ECOLIBifunctionalligase/repressorBirAOS=Escherichiacoli(strainK12)GN=birAPE=1SV=1	sp|P06709|BIRA_ECOLIBifunctionalligase/repressorBirAOS=Escherichiacoli(strainK12)GN=birAPE=1SV=1	MULTI-MSMS	12_J3_	BirADtBio100_DtDigest	848.77	3	848.436	2542.28	23556.9	2.2378	0.0018986	-1.3197	-0.0011196	0.91816	0.000779	848.769	104.35	2.5054	104.35	103.46	105.97	-7.6294e-06					127	76	2	0	0	0	0.01	2	12779
LIALLANGEFHSGEQLGETLGMSR	24	Unmodified	_LIALLANGEFHSGEQLGETLGMSR_					0	0	0	0	0	sp|P06709|BIRA_ECOLIBifunctionalligase/repressorBirAOS=Escherichiacoli(strainK12)GN=birAPE=1SV=1	sp|P06709|BIRA_ECOLIBifunctionalligase/repressorBirAOS=Escherichiacoli(strainK12)GN=birAPE=1SV=1	sp|P06709|BIRA_ECOLIBifunctionalligase/repressorBirAOS=Escherichiacoli(strainK12)GN=birAPE=1SV=1	MSMS	12_J3_	BirADtBio100_DtDigest	848.77	3	848.436	2542.28	NaN	NaN	NaN	NaN	NaN	NaN	NaN	NaN	113.05	1	113.05	112.55	113.55	0								0	0	0	0.01	1	13702
LIALLANGEFHSGEQLGETLGMSR	24	Unmodified	_LIALLANGEFHSGEQLGETLGMSR_					0	0	0	0	0	sp|P06709|BIRA_ECOLIBifunctionalligase/repressorBirAOS=Escherichiacoli(strainK12)GN=birAPE=1SV=1	sp|P06709|BIRA_ECOLIBifunctionalligase/repressorBirAOS=Escherichiacoli(strainK12)GN=birAPE=1SV=1	sp|P06709|BIRA_ECOLIBifunctionalligase/repressorBirAOS=Escherichiacoli(strainK12)GN=birAPE=1SV=1	MULTI-SECPEP	12_J3_	BirADtBio100_DtDigest	636.097	4	636.579	2542.28	26528	1.2575	0.00080051	-3.9721	-0.0025285	-2.7146	-0.001728	637.077	94.501	0.63409	94.501	94.313	94.947	0					28	18	2	0	0	0	0.01	1	11479
LIALLANGEFHSGEQLGETLGMSR	24	Unmodified	_LIALLANGEFHSGEQLGETLGMSR_					0	0	0	0	0	sp|P06709|BIRA_ECOLIBifunctionalligase/repressorBirAOS=Escherichiacoli(strainK12)GN=birAPE=1SV=1	sp|P06709|BIRA_ECOLIBifunctionalligase/repressorBirAOS=Escherichiacoli(strainK12)GN=birAPE=1SV=1	sp|P06709|BIRA_ECOLIBifunctionalligase/repressorBirAOS=Escherichiacoli(strainK12)GN=birAPE=1SV=1	MULTI-SECPEP	12_J3_	BirADtBio100_DtDigest	848.767	3	848.436	2542.28	20106.7	2.1638	0.0018359	2.4691	0.0020949	4.633	0.0039308	848.771	102.99	0.67398	102.99	102.66	103.33	0					17	15	2	0	0	0	0.01	1	12552
LIALLANGEFHSGEQLGETLGMSR	24	Unmodified	_LIALLANGEFHSGEQLGETLGMSR_					0	0	0	0	0	sp|P06709|BIRA_ECOLIBifunctionalligase/repressorBirAOS=Escherichiacoli(strainK12)GN=birAPE=1SV=1	sp|P06709|BIRA_ECOLIBifunctionalligase/repressorBirAOS=Escherichiacoli(strainK12)GN=birAPE=1SV=1	sp|P06709|BIRA_ECOLIBifunctionalligase/repressorBirAOS=Escherichiacoli(strainK12)GN=birAPE=1SV=1	MULTI-SECPEP	12_J3_	BirADtBio100_DtDigest	848.773	3	848.436	2542.28	22383.1	2.3774	0.0020171	-1.1351	-0.00096308	1.2423	0.001054	849.103	108.08	0.94106	108.08	107.29	108.23	0					70	41	2	0	0	0	0.01	1	13130
LIALLANGEFHSGEQLGETLGMSR	24	Unmodified	_LIALLANGEFHSGEQLGETLGMSR_					0	0	0	0	0	sp|P06709|BIRA_ECOLIBifunctionalligase/repressorBirAOS=Escherichiacoli(strainK12)GN=birAPE=1SV=1	sp|P06709|BIRA_ECOLIBifunctionalligase/repressorBirAOS=Escherichiacoli(strainK12)GN=birAPE=1SV=1	sp|P06709|BIRA_ECOLIBifunctionalligase/repressorBirAOS=Escherichiacoli(strainK12)GN=birAPE=1SV=1	MULTI-SECPEP	12_J3_	BirADtBio100_DtDigest	848.772	3	848.436	2542.28	22733.2	2.4411	0.0020711	-0.75608	-0.00064149	1.685	0.0014296	848.77	109.29	0.50952	109.29	108.94	109.45	0					40	26	2	0	0	0	0.01	1	13315
LIIGDKEIFGISR	13	Unmodified	_LIIGDKEIFGISR_					0	0	0	0	1	sp|P06709|BIRA_ECOLIBifunctionalligase/repressorBirAOS=Escherichiacoli(strainK12)GN=birAPE=1SV=1	sp|P06709|BIRA_ECOLIBifunctionalligase/repressorBirAOS=Escherichiacoli(strainK12)GN=birAPE=1SV=1	sp|P06709|BIRA_ECOLIBifunctionalligase/repressorBirAOS=Escherichiacoli(strainK12)GN=birAPE=1SV=1	MULTI-MSMS	12_J3_	BirADtBio100_DtDigest	730.928	2	730.927	1459.84	24347.3	1.6008	0.00117	0.55252	0.00040385	2.1533	0.0015739	730.928	83.787	4.1084	83.787	82.401	86.51	0					511	119	5	0	0	0	0.01	5	9952
LIIGDKEIFGISR	13	Unmodified	_LIIGDKEIFGISR_					0	0	0	0	1	sp|P06709|BIRA_ECOLIBifunctionalligase/repressorBirAOS=Escherichiacoli(strainK12)GN=birAPE=1SV=1	sp|P06709|BIRA_ECOLIBifunctionalligase/repressorBirAOS=Escherichiacoli(strainK12)GN=birAPE=1SV=1	sp|P06709|BIRA_ECOLIBifunctionalligase/repressorBirAOS=Escherichiacoli(strainK12)GN=birAPE=1SV=1	MULTI-MSMS	12_J3_	BirADtBio100_DtDigest	487.622	3	487.621	1459.84	30651.2	2.2085	0.0010769	-0.060256	-2.9382e-05	2.1483	0.0010475	487.62	90.361	1.5982	90.361	89.798	91.396	0					83	60	2	0	0	0	0.01	1	10915
LIIGDKEIFGISR	13	Unmodified	_LIIGDKEIFGISR_					0	0	0	0	1	sp|P06709|BIRA_ECOLIBifunctionalligase/repressorBirAOS=Escherichiacoli(strainK12)GN=birAPE=1SV=1	sp|P06709|BIRA_ECOLIBifunctionalligase/repressorBirAOS=Escherichiacoli(strainK12)GN=birAPE=1SV=1	sp|P06709|BIRA_ECOLIBifunctionalligase/repressorBirAOS=Escherichiacoli(strainK12)GN=birAPE=1SV=1	MULTI-MSMS	12_J3_	BirADtBio100_DtDigest	487.621	3	487.621	1459.84	32351.4	2.1131	0.0010304	-0.32054	-0.0001563	1.7925	0.00087408	487.62	94.311	0.85251	94.311	93.913	94.765	0					38	27	2	0	0	0	0.01	1	11470
LIIGDKEIFGISR	13	Unmodified	_LIIGDKEIFGISR_					0	0	0	0	1	sp|P06709|BIRA_ECOLIBifunctionalligase/repressorBirAOS=Escherichiacoli(strainK12)GN=birAPE=1SV=1	sp|P06709|BIRA_ECOLIBifunctionalligase/repressorBirAOS=Escherichiacoli(strainK12)GN=birAPE=1SV=1	sp|P06709|BIRA_ECOLIBifunctionalligase/repressorBirAOS=Escherichiacoli(strainK12)GN=birAPE=1SV=1	MULTI-MSMS	12_J3_	BirADtBio100_DtDigest	487.622	3	487.621	1459.84	32453.1	1.8627	0.0009083	-0.3555	-0.00017335	1.5072	0.00073495	487.62	99.749	1.8124	99.749	98.514	100.33	7.6294e-06					96	58	2	0	0	0	0.01	2	12030
LIIGDKEIFGISR	13	Unmodified	_LIIGDKEIFGISR_					0	0	0	0	1	sp|P06709|BIRA_ECOLIBifunctionalligase/repressorBirAOS=Escherichiacoli(strainK12)GN=birAPE=1SV=1	sp|P06709|BIRA_ECOLIBifunctionalligase/repressorBirAOS=Escherichiacoli(strainK12)GN=birAPE=1SV=1	sp|P06709|BIRA_ECOLIBifunctionalligase/repressorBirAOS=Escherichiacoli(strainK12)GN=birAPE=1SV=1	MULTI-MSMS	12_J3_	BirADtBio100_DtDigest	487.621	3	487.621	1459.84	NaN	1.9397	0.00094582	0.71159	0.00034698	2.6513	0.0012928	487.621	101.39	0.54741	101.39	101.07	101.62	7.6294e-06					20	19	2	0	0	0	0.01	1	12351
LIIGDKEIFGISR	13	Unmodified	_LIIGDKEIFGISR_					0	0	0	0	1	sp|P06709|BIRA_ECOLIBifunctionalligase/repressorBirAOS=Escherichiacoli(strainK12)GN=birAPE=1SV=1	sp|P06709|BIRA_ECOLIBifunctionalligase/repressorBirAOS=Escherichiacoli(strainK12)GN=birAPE=1SV=1	sp|P06709|BIRA_ECOLIBifunctionalligase/repressorBirAOS=Escherichiacoli(strainK12)GN=birAPE=1SV=1	MULTI-MSMS	12_J3_	BirADtBio100_DtDigest	487.622	3	487.621	1459.84	32410.1	2.0188	0.00098439	0.28686	0.00013988	2.3056	0.0011243	487.621	102.89	1.1616	102.89	102.33	103.49	0					44	26	2	0	0	0	0.01	1	12579
LIIGDKEIFGISR	13	Unmodified	_LIIGDKEIFGISR_					0	0	0	0	1	sp|P06709|BIRA_ECOLIBifunctionalligase/repressorBirAOS=Escherichiacoli(strainK12)GN=birAPE=1SV=1	sp|P06709|BIRA_ECOLIBifunctionalligase/repressorBirAOS=Escherichiacoli(strainK12)GN=birAPE=1SV=1	sp|P06709|BIRA_ECOLIBifunctionalligase/repressorBirAOS=Escherichiacoli(strainK12)GN=birAPE=1SV=1	MULTI-MSMS	12_J3_	BirADtBio100_DtDigest	487.955	3	487.621	1459.84	31548.4	2.1055	0.0010267	0.10253	4.9994e-05	2.208	0.0010767	487.621	104.85	1.7405	104.85	104.19	105.93	0					122	53	3	0	0	0	0.01	2	12780
LIIGDKEIFGISR	13	Unmodified	_LIIGDKEIFGISR_					0	0	0	0	1	sp|P06709|BIRA_ECOLIBifunctionalligase/repressorBirAOS=Escherichiacoli(strainK12)GN=birAPE=1SV=1	sp|P06709|BIRA_ECOLIBifunctionalligase/repressorBirAOS=Escherichiacoli(strainK12)GN=birAPE=1SV=1	sp|P06709|BIRA_ECOLIBifunctionalligase/repressorBirAOS=Escherichiacoli(strainK12)GN=birAPE=1SV=1	MULTI-MSMS	12_J3_	BirADtBio100_DtDigest	731.43	2	730.927	1459.84	26875.1	1.8063	0.0013203	-1.4235	-0.0010405	0.38282	0.00027982	731.428	107.15	0.114	107.15	107.08	107.2	0					10	6	2	0	0	0	0.01	1	13110
LIIGDKEIFGISR	13	Unmodified	_LIIGDKEIFGISR_					0	0	0	0	1	sp|P06709|BIRA_ECOLIBifunctionalligase/repressorBirAOS=Escherichiacoli(strainK12)GN=birAPE=1SV=1	sp|P06709|BIRA_ECOLIBifunctionalligase/repressorBirAOS=Escherichiacoli(strainK12)GN=birAPE=1SV=1	sp|P06709|BIRA_ECOLIBifunctionalligase/repressorBirAOS=Escherichiacoli(strainK12)GN=birAPE=1SV=1	MSMS	12_J3_	BirADtBio100_DtDigest	487.622	3	487.621	1459.84	NaN	NaN	NaN	NaN	NaN	NaN	NaN	NaN	91.843	1	91.843	91.343	92.343	0								0	0	0	0.01	1	11130
LIIGDKEIFGISR	13	Unmodified	_LIIGDKEIFGISR_					0	0	0	0	1	sp|P06709|BIRA_ECOLIBifunctionalligase/repressorBirAOS=Escherichiacoli(strainK12)GN=birAPE=1SV=1	sp|P06709|BIRA_ECOLIBifunctionalligase/repressorBirAOS=Escherichiacoli(strainK12)GN=birAPE=1SV=1	sp|P06709|BIRA_ECOLIBifunctionalligase/repressorBirAOS=Escherichiacoli(strainK12)GN=birAPE=1SV=1	MSMS	12_J3_	BirADtBio100_DtDigest	487.62	3	487.621	1459.84	NaN	NaN	NaN	NaN	NaN	NaN	NaN	NaN	93.329	1	93.329	92.829	93.829	7.6294e-06								0	0	0	0.01	1	11335
LIIGDKEIFGISR	13	Unmodified	_LIIGDKEIFGISR_					0	0	0	0	1	sp|P06709|BIRA_ECOLIBifunctionalligase/repressorBirAOS=Escherichiacoli(strainK12)GN=birAPE=1SV=1	sp|P06709|BIRA_ECOLIBifunctionalligase/repressorBirAOS=Escherichiacoli(strainK12)GN=birAPE=1SV=1	sp|P06709|BIRA_ECOLIBifunctionalligase/repressorBirAOS=Escherichiacoli(strainK12)GN=birAPE=1SV=1	MSMS	12_J3_	BirADtBio100_DtDigest	487.621	3	487.621	1459.84	NaN	NaN	NaN	NaN	NaN	NaN	NaN	NaN	95.792	1	95.792	95.292	96.292	0								0	0	0	0.01	1	11661
LIIGDKEIFGISR	13	Unmodified	_LIIGDKEIFGISR_					0	0	0	0	1	sp|P06709|BIRA_ECOLIBifunctionalligase/repressorBirAOS=Escherichiacoli(strainK12)GN=birAPE=1SV=1	sp|P06709|BIRA_ECOLIBifunctionalligase/repressorBirAOS=Escherichiacoli(strainK12)GN=birAPE=1SV=1	sp|P06709|BIRA_ECOLIBifunctionalligase/repressorBirAOS=Escherichiacoli(strainK12)GN=birAPE=1SV=1	MSMS	12_J3_	BirADtBio100_DtDigest	487.622	3	487.621	1459.84	NaN	NaN	NaN	NaN	NaN	NaN	NaN	NaN	97.734	1	97.734	97.234	98.234	0								0	0	0	0.01	1	11910
LIIGDKEIFGISR	13	Unmodified	_LIIGDKEIFGISR_					0	0	0	0	1	sp|P06709|BIRA_ECOLIBifunctionalligase/repressorBirAOS=Escherichiacoli(strainK12)GN=birAPE=1SV=1	sp|P06709|BIRA_ECOLIBifunctionalligase/repressorBirAOS=Escherichiacoli(strainK12)GN=birAPE=1SV=1	sp|P06709|BIRA_ECOLIBifunctionalligase/repressorBirAOS=Escherichiacoli(strainK12)GN=birAPE=1SV=1	MULTI-SECPEP	12_J3_	BirADtBio100_DtDigest	487.622	3	487.621	1459.84	31475.8	1.8679	0.0009108	0.09393	4.5802e-05	1.9618	0.00095661	487.621	98.099	1.5476	98.099	97.291	98.839	0					62	42	2	0	0	0	0.01	1	11910
MKDNTVPLK	9	Unmodified	_MKDNTVPLK_					0	0	0	0	1	sp|P06709|BIRA_ECOLIBifunctionalligase/repressorBirAOS=Escherichiacoli(strainK12)GN=birAPE=1SV=1	sp|P06709|BIRA_ECOLIBifunctionalligase/repressorBirAOS=Escherichiacoli(strainK12)GN=birAPE=1SV=1	sp|P06709|BIRA_ECOLIBifunctionalligase/repressorBirAOS=Escherichiacoli(strainK12)GN=birAPE=1SV=1	MULTI-MSMS	12_J3_	BirADtBio100_DtDigest	523.289	2	523.289	1044.56	29274.1	0.46881	0.00024532	0.31863	0.00016673	0.78744	0.00041206	523.289	18.327	1.1609	18.327	17.764	18.924	0					102	45	3	0	0	0	0.01	2	1359
MKDNTVPLK	9	Unmodified	_MKDNTVPLK_					0	0	0	0	1	sp|P06709|BIRA_ECOLIBifunctionalligase/repressorBirAOS=Escherichiacoli(strainK12)GN=birAPE=1SV=1	sp|P06709|BIRA_ECOLIBifunctionalligase/repressorBirAOS=Escherichiacoli(strainK12)GN=birAPE=1SV=1	sp|P06709|BIRA_ECOLIBifunctionalligase/repressorBirAOS=Escherichiacoli(strainK12)GN=birAPE=1SV=1	MULTI-MSMS	12_J3_	BirADtBio100_DtDigest	349.196	3	349.195	1044.56	35181.7	1.4424	0.00050368	1.1218	0.00039171	2.5642	0.00089539	349.196	18.308	1.2581	18.308	17.691	18.949	0					123	50	3	0	0	0	0.01	2	1364
MKDNTVPLK	9	Unmodified	_MKDNTVPLK_					0	0	0	0	1	sp|P06709|BIRA_ECOLIBifunctionalligase/repressorBirAOS=Escherichiacoli(strainK12)GN=birAPE=1SV=1	sp|P06709|BIRA_ECOLIBifunctionalligase/repressorBirAOS=Escherichiacoli(strainK12)GN=birAPE=1SV=1	sp|P06709|BIRA_ECOLIBifunctionalligase/repressorBirAOS=Escherichiacoli(strainK12)GN=birAPE=1SV=1	MULTI-MSMS	12_J3_	BirADtBio100_DtDigest	349.196	3	349.195	1044.56	35547.4	1.9567	0.00068326	0.025159	8.7853e-06	1.9818	0.00069205	349.195	46.796	9.0322	46.796	41.422	50.454	0					749	303	3	0	0	0	0.01	8	4449
MKDNTVPLK	9	Unmodified	_MKDNTVPLK_					0	0	0	0	1	sp|P06709|BIRA_ECOLIBifunctionalligase/repressorBirAOS=Escherichiacoli(strainK12)GN=birAPE=1SV=1	sp|P06709|BIRA_ECOLIBifunctionalligase/repressorBirAOS=Escherichiacoli(strainK12)GN=birAPE=1SV=1	sp|P06709|BIRA_ECOLIBifunctionalligase/repressorBirAOS=Escherichiacoli(strainK12)GN=birAPE=1SV=1	MULTI-MSMS	12_J3_	BirADtBio100_DtDigest	523.291	2	523.289	1044.56	29596.5	0.98956	0.00051783	0.15782	8.2585e-05	1.1474	0.00060041	523.289	47.14	6.2852	47.14	43.77	50.055	0					498	219	3	0	0	0	0.01	7	4632
NTLAAMLIR	9	Unmodified	_NTLAAMLIR_					0	0	0	0	0	sp|P06709|BIRA_ECOLIBifunctionalligase/repressorBirAOS=Escherichiacoli(strainK12)GN=birAPE=1SV=1	sp|P06709|BIRA_ECOLIBifunctionalligase/repressorBirAOS=Escherichiacoli(strainK12)GN=birAPE=1SV=1	sp|P06709|BIRA_ECOLIBifunctionalligase/repressorBirAOS=Escherichiacoli(strainK12)GN=birAPE=1SV=1	MULTI-MSMS	12_J3_	BirADtBio100_DtDigest	501.793	2	501.792	1001.57	29398.1	1.8379	0.00092224	0.1301	6.5284e-05	1.968	0.00098752	501.792	82.005	3.1425	82.005	80.542	83.684	0					227	72	5	0	0	0	0.01	3	9700
QGALLLEQDGIIK	13	Unmodified	_QGALLLEQDGIIK_					0	0	0	0	0	sp|P06709|BIRA_ECOLIBifunctionalligase/repressorBirAOS=Escherichiacoli(strainK12)GN=birAPE=1SV=1	sp|P06709|BIRA_ECOLIBifunctionalligase/repressorBirAOS=Escherichiacoli(strainK12)GN=birAPE=1SV=1	sp|P06709|BIRA_ECOLIBifunctionalligase/repressorBirAOS=Escherichiacoli(strainK12)GN=birAPE=1SV=1	MULTI-MSMS	12_J3_	BirADtBio100_DtDigest	699.405	2	699.404	1396.79	25334.2	1.2373	0.0008654	0.55129	0.00038558	1.7886	0.001251	699.404	77.674	1.0094	77.674	77.145	78.154	0					37	21	2	0	0	0	0.01	1	9153
QGALLLEQDGIIKPWMGGEISLR	23	Unmodified	_QGALLLEQDGIIKPWMGGEISLR_					0	0	0	0	1	sp|P06709|BIRA_ECOLIBifunctionalligase/repressorBirAOS=Escherichiacoli(strainK12)GN=birAPE=1SV=1	sp|P06709|BIRA_ECOLIBifunctionalligase/repressorBirAOS=Escherichiacoli(strainK12)GN=birAPE=1SV=1	sp|P06709|BIRA_ECOLIBifunctionalligase/repressorBirAOS=Escherichiacoli(strainK12)GN=birAPE=1SV=1	MULTI-MSMS	12_J3_	BirADtBio100_DtDigest	842.461	3	842.125	2523.35	23215.3	1.9627	0.0016529	0.44756	0.0003769	2.4103	0.0020298	842.459	99.099	1.906	99.099	98.222	100.13	0					247	55	5	0	0	0	0.01	2	12068
QGALLLEQDGIIKPWMGGEISLR	23	Unmodified	_QGALLLEQDGIIKPWMGGEISLR_					0	0	0	0	1	sp|P06709|BIRA_ECOLIBifunctionalligase/repressorBirAOS=Escherichiacoli(strainK12)GN=birAPE=1SV=1	sp|P06709|BIRA_ECOLIBifunctionalligase/repressorBirAOS=Escherichiacoli(strainK12)GN=birAPE=1SV=1	sp|P06709|BIRA_ECOLIBifunctionalligase/repressorBirAOS=Escherichiacoli(strainK12)GN=birAPE=1SV=1	MULTI-MSMS	12_J3_	BirADtBio100_DtDigest	1263.19	2	1262.68	2523.35	18515.1	3.9356	0.0049695	-0.48772	-0.00061583	3.4479	0.0043536	1263.18	99.147	1.2501	99.147	98.514	99.764	0					104	37	4	0	0	0	0.01	1	12105
QGALLLEQDGIIKPWMGGEISLR	23	Unmodified	_QGALLLEQDGIIKPWMGGEISLR_					0	0	0	0	1	sp|P06709|BIRA_ECOLIBifunctionalligase/repressorBirAOS=Escherichiacoli(strainK12)GN=birAPE=1SV=1	sp|P06709|BIRA_ECOLIBifunctionalligase/repressorBirAOS=Escherichiacoli(strainK12)GN=birAPE=1SV=1	sp|P06709|BIRA_ECOLIBifunctionalligase/repressorBirAOS=Escherichiacoli(strainK12)GN=birAPE=1SV=1	MULTI-MSMS	12_J3_	BirADtBio100_DtDigest	842.119	3	842.125	2523.35	23223.5	2.1276	0.0017917	-3.5146	-0.0029597	-1.3869	-0.001168	842.455	103.05	1.5344	103.05	101.87	103.4	0					104	34	5	0	0	0	0.01	2	12490
QILGQLDGGSVAVLPVIDSTNQYLLDR	27	Unmodified	_QILGQLDGGSVAVLPVIDSTNQYLLDR_					0	0	0	0	0	sp|P06709|BIRA_ECOLIBifunctionalligase/repressorBirAOS=Escherichiacoli(strainK12)GN=birAPE=1SV=1	sp|P06709|BIRA_ECOLIBifunctionalligase/repressorBirAOS=Escherichiacoli(strainK12)GN=birAPE=1SV=1	sp|P06709|BIRA_ECOLIBifunctionalligase/repressorBirAOS=Escherichiacoli(strainK12)GN=birAPE=1SV=1	MULTI-MSMS	12_J3_	BirADtBio100_DtDigest	962.523	3	962.185	2883.53	20835.7	2.5444	0.0024482	-0.85096	-0.00081878	1.6934	0.0016294	962.52	97.928	1.1886	97.928	97.433	98.621	0					104	31	5	0	0	0	0.01	1	11899
QILGQLDGGSVAVLPVIDSTNQYLLDR	27	Unmodified	_QILGQLDGGSVAVLPVIDSTNQYLLDR_					0	0	0	0	0	sp|P06709|BIRA_ECOLIBifunctionalligase/repressorBirAOS=Escherichiacoli(strainK12)GN=birAPE=1SV=1	sp|P06709|BIRA_ECOLIBifunctionalligase/repressorBirAOS=Escherichiacoli(strainK12)GN=birAPE=1SV=1	sp|P06709|BIRA_ECOLIBifunctionalligase/repressorBirAOS=Escherichiacoli(strainK12)GN=birAPE=1SV=1	MULTI-MSMS	12_J3_	BirADtBio100_DtDigest	962.523	3	962.185	2883.53	21413.4	2.5475	0.0024512	0.10958	0.00010544	2.6571	0.0025566	962.521	99.911	0.91108	99.911	99.452	100.36	7.6294e-06					124	31	6	0	0	0	0.01	1	12193
QILGQLDGGSVAVLPVIDSTNQYLLDR	27	Unmodified	_QILGQLDGGSVAVLPVIDSTNQYLLDR_					0	0	0	0	0	sp|P06709|BIRA_ECOLIBifunctionalligase/repressorBirAOS=Escherichiacoli(strainK12)GN=birAPE=1SV=1	sp|P06709|BIRA_ECOLIBifunctionalligase/repressorBirAOS=Escherichiacoli(strainK12)GN=birAPE=1SV=1	sp|P06709|BIRA_ECOLIBifunctionalligase/repressorBirAOS=Escherichiacoli(strainK12)GN=birAPE=1SV=1	MULTI-MSMS	12_J3_	BirADtBio100_DtDigest	1443.28	2	1442.77	2883.53	17313.9	4.0845	0.005893	0.60818	0.00087747	4.6927	0.0067705	1443.28	101.8	1.8065	101.8	101.07	102.88	0					298	56	7	0	0	0	0.01	1	12479
QILGQLDGGSVAVLPVIDSTNQYLLDR	27	Unmodified	_QILGQLDGGSVAVLPVIDSTNQYLLDR_					0	0	0	0	0	sp|P06709|BIRA_ECOLIBifunctionalligase/repressorBirAOS=Escherichiacoli(strainK12)GN=birAPE=1SV=1	sp|P06709|BIRA_ECOLIBifunctionalligase/repressorBirAOS=Escherichiacoli(strainK12)GN=birAPE=1SV=1	sp|P06709|BIRA_ECOLIBifunctionalligase/repressorBirAOS=Escherichiacoli(strainK12)GN=birAPE=1SV=1	MULTI-MSMS	12_J3_	BirADtBio100_DtDigest	962.852	3	962.185	2883.53	21436.9	2.8185	0.0027119	0.33343	0.00032082	3.1519	0.0030327	962.52	105.96	2.4896	105.96	104.55	107.04	0					321	84	5	0	0	0	0.01	2	12911
QILGQLDGGSVAVLPVIDSTNQYLLDR	27	Unmodified	_QILGQLDGGSVAVLPVIDSTNQYLLDR_					0	0	0	0	0	sp|P06709|BIRA_ECOLIBifunctionalligase/repressorBirAOS=Escherichiacoli(strainK12)GN=birAPE=1SV=1	sp|P06709|BIRA_ECOLIBifunctionalligase/repressorBirAOS=Escherichiacoli(strainK12)GN=birAPE=1SV=1	sp|P06709|BIRA_ECOLIBifunctionalligase/repressorBirAOS=Escherichiacoli(strainK12)GN=birAPE=1SV=1	MULTI-MSMS	12_J3_	BirADtBio100_DtDigest	962.529	3	962.185	2883.53	21395.6	3.1379	0.0030192	0.25251	0.00024296	3.3904	0.0032622	962.52	113.11	0.7148	113.11	112.81	113.52	0					112	55	3	0	0	0	0.01	1	13692
QILGQLDGGSVAVLPVIDSTNQYLLDR	27	Unmodified	_QILGQLDGGSVAVLPVIDSTNQYLLDR_					0	0	0	0	0	sp|P06709|BIRA_ECOLIBifunctionalligase/repressorBirAOS=Escherichiacoli(strainK12)GN=birAPE=1SV=1	sp|P06709|BIRA_ECOLIBifunctionalligase/repressorBirAOS=Escherichiacoli(strainK12)GN=birAPE=1SV=1	sp|P06709|BIRA_ECOLIBifunctionalligase/repressorBirAOS=Escherichiacoli(strainK12)GN=birAPE=1SV=1	MULTI-MSMS	12_J3_	BirADtBio100_DtDigest	962.854	3	962.185	2883.53	21219.1	3.1583	0.0030388	0.33043	0.00031794	3.4887	0.0033568	962.52	113.6	0.35811	113.6	113.52	113.88	7.6294e-06					41	29	2	0	0	0	0.01	1	13773
QILGQLDGGSVAVLPVIDSTNQYLLDR	27	Unmodified	_QILGQLDGGSVAVLPVIDSTNQYLLDR_					0	0	0	0	0	sp|P06709|BIRA_ECOLIBifunctionalligase/repressorBirAOS=Escherichiacoli(strainK12)GN=birAPE=1SV=1	sp|P06709|BIRA_ECOLIBifunctionalligase/repressorBirAOS=Escherichiacoli(strainK12)GN=birAPE=1SV=1	sp|P06709|BIRA_ECOLIBifunctionalligase/repressorBirAOS=Escherichiacoli(strainK12)GN=birAPE=1SV=1	MULTI-SECPEP	12_J3_	BirADtBio100_DtDigest	722.394	4	721.891	2883.53	25049.9	1.5252	0.001101	1.0999	0.00079404	2.6252	0.0018951	722.142	101.86	0.79068	101.86	101.47	102.26	-7.6294e-06					70	32	3	0	0	0	0.01	1	12408
QILGQLDGGSVAVLPVIDSTNQYLLDR	27	Unmodified	_QILGQLDGGSVAVLPVIDSTNQYLLDR_					0	0	0	0	0	sp|P06709|BIRA_ECOLIBifunctionalligase/repressorBirAOS=Escherichiacoli(strainK12)GN=birAPE=1SV=1	sp|P06709|BIRA_ECOLIBifunctionalligase/repressorBirAOS=Escherichiacoli(strainK12)GN=birAPE=1SV=1	sp|P06709|BIRA_ECOLIBifunctionalligase/repressorBirAOS=Escherichiacoli(strainK12)GN=birAPE=1SV=1	MULTI-SECPEP	12_J3_	BirADtBio100_DtDigest	963.528	3	962.185	2883.53	21735.3	2.7459	0.002642	-3.6738	-0.0035348	-0.92788	-0.0008928	962.852	104.45	0.74793	104.45	103.94	104.69	0					44	21	3	0	0	0	0.01	1	12806
QILGQLDGGSVAVLPVIDSTNQYLLDR	27	Unmodified	_QILGQLDGGSVAVLPVIDSTNQYLLDR_					0	0	0	0	0	sp|P06709|BIRA_ECOLIBifunctionalligase/repressorBirAOS=Escherichiacoli(strainK12)GN=birAPE=1SV=1	sp|P06709|BIRA_ECOLIBifunctionalligase/repressorBirAOS=Escherichiacoli(strainK12)GN=birAPE=1SV=1	sp|P06709|BIRA_ECOLIBifunctionalligase/repressorBirAOS=Escherichiacoli(strainK12)GN=birAPE=1SV=1	MULTI-SECPEP	12_J3_	BirADtBio100_DtDigest	1443.27	2	1442.77	2883.53	15952.5	4.319	0.0062314	0.19061	0.00027501	4.5096	0.0065064	1443.28	106.97	0.37659	106.97	106.85	107.23	0					41	21	3	0	0	0	0.01	1	13088
RVEESVVNQGWITLQEAGINLDR	23	Unmodified	_RVEESVVNQGWITLQEAGINLDR_					0	0	0	0	1	sp|P06709|BIRA_ECOLIBifunctionalligase/repressorBirAOS=Escherichiacoli(strainK12)GN=birAPE=1SV=1	sp|P06709|BIRA_ECOLIBifunctionalligase/repressorBirAOS=Escherichiacoli(strainK12)GN=birAPE=1SV=1	sp|P06709|BIRA_ECOLIBifunctionalligase/repressorBirAOS=Escherichiacoli(strainK12)GN=birAPE=1SV=1	MULTI-MSMS	12_J3_	BirADtBio100_DtDigest	876.461	3	876.124	2625.35	22582	2.289	0.0020054	1.304	0.0011425	3.593	0.0031479	876.46	95.479	3.2968	95.479	94.734	98.03	-7.6294e-06					468	102	7	0	0	0	0.01	3	11557
RVEESVVNQGWITLQEAGINLDR	23	Unmodified	_RVEESVVNQGWITLQEAGINLDR_					0	0	0	0	1	sp|P06709|BIRA_ECOLIBifunctionalligase/repressorBirAOS=Escherichiacoli(strainK12)GN=birAPE=1SV=1	sp|P06709|BIRA_ECOLIBifunctionalligase/repressorBirAOS=Escherichiacoli(strainK12)GN=birAPE=1SV=1	sp|P06709|BIRA_ECOLIBifunctionalligase/repressorBirAOS=Escherichiacoli(strainK12)GN=birAPE=1SV=1	MULTI-MSMS	12_J3_	BirADtBio100_DtDigest	1314.19	2	1313.68	2625.35	17903.6	4.1414	0.0054405	0.38879	0.00051074	4.5302	0.0059513	1314.18	95.653	1.3296	95.653	95.029	96.359	-7.6294e-06					199	44	6	0	0	0	0.01	2	11580
RVEESVVNQGWITLQEAGINLDR	23	Unmodified	_RVEESVVNQGWITLQEAGINLDR_					0	0	0	0	1	sp|P06709|BIRA_ECOLIBifunctionalligase/repressorBirAOS=Escherichiacoli(strainK12)GN=birAPE=1SV=1	sp|P06709|BIRA_ECOLIBifunctionalligase/repressorBirAOS=Escherichiacoli(strainK12)GN=birAPE=1SV=1	sp|P06709|BIRA_ECOLIBifunctionalligase/repressorBirAOS=Escherichiacoli(strainK12)GN=birAPE=1SV=1	MULTI-MSMS	12_J3_	BirADtBio100_DtDigest	657.596	4	657.345	2625.35	25922.9	1.2882	0.00084677	0.73637	0.00048405	2.0245	0.0013308	657.847	95.847	1.2177	95.847	95.089	96.307	0					100	40	5	0	0	0	0.01	1	11590
RVEESVVNQGWITLQEAGINLDR	23	Unmodified	_RVEESVVNQGWITLQEAGINLDR_					0	0	0	0	1	sp|P06709|BIRA_ECOLIBifunctionalligase/repressorBirAOS=Escherichiacoli(strainK12)GN=birAPE=1SV=1	sp|P06709|BIRA_ECOLIBifunctionalligase/repressorBirAOS=Escherichiacoli(strainK12)GN=birAPE=1SV=1	sp|P06709|BIRA_ECOLIBifunctionalligase/repressorBirAOS=Escherichiacoli(strainK12)GN=birAPE=1SV=1	MULTI-MSMS	12_J3_	BirADtBio100_DtDigest	876.459	3	876.124	2625.35	22723.4	2.3171	0.0020301	0.90898	0.00079638	3.2261	0.0028265	876.459	103.63	0.81796	103.63	103.24	104.06	7.6294e-06					41	24	2	0	0	0	0.01	1	12679
RVEESVVNQGWITLQEAGINLDR	23	Unmodified	_RVEESVVNQGWITLQEAGINLDR_					0	0	0	0	1	sp|P06709|BIRA_ECOLIBifunctionalligase/repressorBirAOS=Escherichiacoli(strainK12)GN=birAPE=1SV=1	sp|P06709|BIRA_ECOLIBifunctionalligase/repressorBirAOS=Escherichiacoli(strainK12)GN=birAPE=1SV=1	sp|P06709|BIRA_ECOLIBifunctionalligase/repressorBirAOS=Escherichiacoli(strainK12)GN=birAPE=1SV=1	MULTI-MSMS	12_J3_	BirADtBio100_DtDigest	876.462	3	876.124	2625.35	22723.4	2.3565	0.0020646	0.96034	0.00084138	3.3168	0.0029059	876.46	104.42	1.3764	104.42	103.94	105.32	0					54	41	2	0	0	0	0.01	1	12790
RVEESVVNQGWITLQEAGINLDR	23	Unmodified	_RVEESVVNQGWITLQEAGINLDR_					0	0	0	0	1	sp|P06709|BIRA_ECOLIBifunctionalligase/repressorBirAOS=Escherichiacoli(strainK12)GN=birAPE=1SV=1	sp|P06709|BIRA_ECOLIBifunctionalligase/repressorBirAOS=Escherichiacoli(strainK12)GN=birAPE=1SV=1	sp|P06709|BIRA_ECOLIBifunctionalligase/repressorBirAOS=Escherichiacoli(strainK12)GN=birAPE=1SV=1	MULTI-MSMS	12_J3_	BirADtBio100_DtDigest	876.796	3	876.124	2625.35	23308.1	2.4529	0.0021491	0.34028	0.00029813	2.7932	0.0024472	876.459	106.46	1.3101	106.46	106.05	107.36	7.6294e-06					121	52	3	0	0	0	0.01	1	13033
RVEESVVNQGWITLQEAGINLDR	23	Unmodified	_RVEESVVNQGWITLQEAGINLDR_					0	0	0	0	1	sp|P06709|BIRA_ECOLIBifunctionalligase/repressorBirAOS=Escherichiacoli(strainK12)GN=birAPE=1SV=1	sp|P06709|BIRA_ECOLIBifunctionalligase/repressorBirAOS=Escherichiacoli(strainK12)GN=birAPE=1SV=1	sp|P06709|BIRA_ECOLIBifunctionalligase/repressorBirAOS=Escherichiacoli(strainK12)GN=birAPE=1SV=1	MULTI-MSMS	12_J3_	BirADtBio100_DtDigest	876.46	3	876.124	2625.35	23461.8	2.5055	0.0021951	0.48498	0.0004249	2.9905	0.00262	876.458	108	0.91751	108	107.36	108.27	0					100	41	4	0	0	0	0.01	1	13194
RVEESVVNQGWITLQEAGINLDR	23	Unmodified	_RVEESVVNQGWITLQEAGINLDR_					0	0	0	0	1	sp|P06709|BIRA_ECOLIBifunctionalligase/repressorBirAOS=Escherichiacoli(strainK12)GN=birAPE=1SV=1	sp|P06709|BIRA_ECOLIBifunctionalligase/repressorBirAOS=Escherichiacoli(strainK12)GN=birAPE=1SV=1	sp|P06709|BIRA_ECOLIBifunctionalligase/repressorBirAOS=Escherichiacoli(strainK12)GN=birAPE=1SV=1	MULTI-MSMS	12_J3_	BirADtBio100_DtDigest	876.797	3	876.124	2625.35	22455.1	2.5547	0.0022382	0.24636	0.00021584	2.801	0.0024541	876.794	108.99	0.99806	108.99	108.44	109.44	-7.6294e-06					134	50	5	0	0	0	0.01	1	13288
RVEESVVNQGWITLQEAGINLDR	23	Unmodified	_RVEESVVNQGWITLQEAGINLDR_					0	0	0	0	1	sp|P06709|BIRA_ECOLIBifunctionalligase/repressorBirAOS=Escherichiacoli(strainK12)GN=birAPE=1SV=1	sp|P06709|BIRA_ECOLIBifunctionalligase/repressorBirAOS=Escherichiacoli(strainK12)GN=birAPE=1SV=1	sp|P06709|BIRA_ECOLIBifunctionalligase/repressorBirAOS=Escherichiacoli(strainK12)GN=birAPE=1SV=1	MULTI-SECPEP	12_J3_	BirADtBio100_DtDigest	877.424	3	876.124	2625.35	22649.7	2.1994	0.0019269	-3.7945	-0.0033244	-1.5951	-0.0013975	876.456	101.18	0.62048	101.18	100.61	101.23	0					27	18	2	0	0	0	0.01	1	12312
RVEESVVNQGWITLQEAGINLDRNTLAAMLIR	32	Unmodified	_RVEESVVNQGWITLQEAGINLDRNTLAAMLIR_					0	0	0	0	2	sp|P06709|BIRA_ECOLIBifunctionalligase/repressorBirAOS=Escherichiacoli(strainK12)GN=birAPE=1SV=1	sp|P06709|BIRA_ECOLIBifunctionalligase/repressorBirAOS=Escherichiacoli(strainK12)GN=birAPE=1SV=1	sp|P06709|BIRA_ECOLIBifunctionalligase/repressorBirAOS=Escherichiacoli(strainK12)GN=birAPE=1SV=1	MULTI-MSMS	12_J3_	BirADtBio100_DtDigest	903.739	4	903.235	3608.91	22290.4	2.4705	0.0022314	-0.55102	-0.0004977	1.9195	0.0017337	903.485	104.23	1.1962	104.23	103.75	104.95	0					113	34	4	0	0	0	0.01	1	12739
SGDACIAEYQQAGR	14	Unmodified	_SGDACIAEYQQAGR_					0	0	0	0	0	sp|P06709|BIRA_ECOLIBifunctionalligase/repressorBirAOS=Escherichiacoli(strainK12)GN=birAPE=1SV=1	sp|P06709|BIRA_ECOLIBifunctionalligase/repressorBirAOS=Escherichiacoli(strainK12)GN=birAPE=1SV=1	sp|P06709|BIRA_ECOLIBifunctionalligase/repressorBirAOS=Escherichiacoli(strainK12)GN=birAPE=1SV=1	MULTI-MSMS	12_J3_	BirADtBio100_DtDigest	763.337	2	763.339	1524.66	23913	0.72956	0.0005569	0.60101	0.00045878	1.3306	0.0010157	763.34	35.368	3.738	35.368	32.105	35.843	0					449	105	6	0	0	0	0.01	5	3043
SGDACIAEYQQAGR	14	Unmodified	_SGDACIAEYQQAGR_					0	0	0	0	0	sp|P06709|BIRA_ECOLIBifunctionalligase/repressorBirAOS=Escherichiacoli(strainK12)GN=birAPE=1SV=1	sp|P06709|BIRA_ECOLIBifunctionalligase/repressorBirAOS=Escherichiacoli(strainK12)GN=birAPE=1SV=1	sp|P06709|BIRA_ECOLIBifunctionalligase/repressorBirAOS=Escherichiacoli(strainK12)GN=birAPE=1SV=1	MULTI-MSMS	12_J3_	BirADtBio100_DtDigest	509.228	3	509.228	1524.66	29804	0.85931	0.00043759	-0.94286	-0.00048013	-0.083547	-4.2545e-05	509.228	35.317	1.4269	35.317	34.416	35.843	0					92	34	4	0	0	0	0.01	1	3427
SGDACIAEYQQAGR	14	Unmodified	_SGDACIAEYQQAGR_					0	0	0	0	0	sp|P06709|BIRA_ECOLIBifunctionalligase/repressorBirAOS=Escherichiacoli(strainK12)GN=birAPE=1SV=1	sp|P06709|BIRA_ECOLIBifunctionalligase/repressorBirAOS=Escherichiacoli(strainK12)GN=birAPE=1SV=1	sp|P06709|BIRA_ECOLIBifunctionalligase/repressorBirAOS=Escherichiacoli(strainK12)GN=birAPE=1SV=1	MULTI-MSMS	12_J3_	BirADtBio100_DtDigest	763.34	2	763.339	1524.66	23913	0.75263	0.00057451	0.70844	0.00054078	1.4611	0.0011153	763.34	36.28	2.4762	36.28	35.676	38.152	-3.8147e-06					199	61	6	0	0	0	0.01	2	3523
SGDACIAEYQQAGR	14	Unmodified	_SGDACIAEYQQAGR_					0	0	0	0	0	sp|P06709|BIRA_ECOLIBifunctionalligase/repressorBirAOS=Escherichiacoli(strainK12)GN=birAPE=1SV=1	sp|P06709|BIRA_ECOLIBifunctionalligase/repressorBirAOS=Escherichiacoli(strainK12)GN=birAPE=1SV=1	sp|P06709|BIRA_ECOLIBifunctionalligase/repressorBirAOS=Escherichiacoli(strainK12)GN=birAPE=1SV=1	MULTI-MSMS	12_J3_	BirADtBio100_DtDigest	509.228	3	509.228	1524.66	30094.2	0.89498	0.00045575	-0.61334	-0.00031233	0.28164	0.00014342	509.228	37.191	1.5396	37.191	36.806	38.346	0					114	38	4	0	0	0	0.01	2	3632
SGDACIAEYQQAGR	14	Unmodified	_SGDACIAEYQQAGR_					0	0	0	0	0	sp|P06709|BIRA_ECOLIBifunctionalligase/repressorBirAOS=Escherichiacoli(strainK12)GN=birAPE=1SV=1	sp|P06709|BIRA_ECOLIBifunctionalligase/repressorBirAOS=Escherichiacoli(strainK12)GN=birAPE=1SV=1	sp|P06709|BIRA_ECOLIBifunctionalligase/repressorBirAOS=Escherichiacoli(strainK12)GN=birAPE=1SV=1	MULTI-MSMS	12_J3_	BirADtBio100_DtDigest	763.34	2	763.339	1524.66	24270.7	0.77411	0.00059091	0.07348	5.609e-05	0.84759	0.000647	763.339	37.241	3.6149	37.241	36.903	40.518	0					269	88	4	0	0	0	0.01	4	3731
SGDACIAEYQQAGR	14	Unmodified	_SGDACIAEYQQAGR_					0	0	0	0	0	sp|P06709|BIRA_ECOLIBifunctionalligase/repressorBirAOS=Escherichiacoli(strainK12)GN=birAPE=1SV=1	sp|P06709|BIRA_ECOLIBifunctionalligase/repressorBirAOS=Escherichiacoli(strainK12)GN=birAPE=1SV=1	sp|P06709|BIRA_ECOLIBifunctionalligase/repressorBirAOS=Escherichiacoli(strainK12)GN=birAPE=1SV=1	MSMS	12_J3_	BirADtBio100_DtDigest	763.339	2	763.339	1524.66	NaN	NaN	NaN	NaN	NaN	NaN	NaN	NaN	116.83	1	116.83	116.33	117.33	0								0	0	0	0.01	1	14038
SGDACIAEYQQAGR	14	Unmodified	_SGDACIAEYQQAGR_					0	0	0	0	0	sp|P06709|BIRA_ECOLIBifunctionalligase/repressorBirAOS=Escherichiacoli(strainK12)GN=birAPE=1SV=1	sp|P06709|BIRA_ECOLIBifunctionalligase/repressorBirAOS=Escherichiacoli(strainK12)GN=birAPE=1SV=1	sp|P06709|BIRA_ECOLIBifunctionalligase/repressorBirAOS=Escherichiacoli(strainK12)GN=birAPE=1SV=1	MULTI-SECPEP	12_J3_	BirADtBio100_DtDigest	507.783	3	509.228	1524.66	30153.9	0.84386	0.00042972	-1.6915	-0.00086137	-0.84766	-0.00043165	509.227	34.77	1.1472	34.77	33.751	34.898	0					54	30	2	0	0	0	0.01	1	3326
TGDAAQIVIGAGINMAMR	18	Unmodified	_TGDAAQIVIGAGINMAMR_					0	0	0	0	0	sp|P06709|BIRA_ECOLIBifunctionalligase/repressorBirAOS=Escherichiacoli(strainK12)GN=birAPE=1SV=1	sp|P06709|BIRA_ECOLIBifunctionalligase/repressorBirAOS=Escherichiacoli(strainK12)GN=birAPE=1SV=1	sp|P06709|BIRA_ECOLIBifunctionalligase/repressorBirAOS=Escherichiacoli(strainK12)GN=birAPE=1SV=1	MULTI-MSMS	12_J3_	BirADtBio100_DtDigest	895.463	2	894.958	1787.9	22398.5	2.506	0.0022428	-0.36908	-0.00033032	2.137	0.0019125	894.959	93.642	2.3389	93.642	92.86	95.199	0					237	69	5	0	0	0	0.01	2	11295
TGDAAQIVIGAGINMAMR	18	Unmodified	_TGDAAQIVIGAGINMAMR_					0	0	0	0	0	sp|P06709|BIRA_ECOLIBifunctionalligase/repressorBirAOS=Escherichiacoli(strainK12)GN=birAPE=1SV=1	sp|P06709|BIRA_ECOLIBifunctionalligase/repressorBirAOS=Escherichiacoli(strainK12)GN=birAPE=1SV=1	sp|P06709|BIRA_ECOLIBifunctionalligase/repressorBirAOS=Escherichiacoli(strainK12)GN=birAPE=1SV=1	MULTI-MSMS	12_J3_	BirADtBio100_DtDigest	596.977	3	596.975	1787.9	27243.5	1.5335	0.00091544	0.084487	5.0436e-05	1.6179	0.00096587	597.309	93.692	2.7497	93.692	92.789	95.539	-7.6294e-06					305	81	6	0	0	0	0.01	3	11301
TGDAAQIVIGAGINMAMR	18	Unmodified	_TGDAAQIVIGAGINMAMR_					0	0	0	0	0	sp|P06709|BIRA_ECOLIBifunctionalligase/repressorBirAOS=Escherichiacoli(strainK12)GN=birAPE=1SV=1	sp|P06709|BIRA_ECOLIBifunctionalligase/repressorBirAOS=Escherichiacoli(strainK12)GN=birAPE=1SV=1	sp|P06709|BIRA_ECOLIBifunctionalligase/repressorBirAOS=Escherichiacoli(strainK12)GN=birAPE=1SV=1	MULTI-MSMS	12_J3_	BirADtBio100_DtDigest	596.977	3	596.975	1787.9	27382	1.4011	0.00083645	1.1174	0.00066704	2.5185	0.0015035	596.976	95.804	0.458	95.804	95.539	95.997	0					21	16	2	0	0	0	0.01	1	11639
TGDAAQIVIGAGINMAMR	18	Unmodified	_TGDAAQIVIGAGINMAMR_					0	0	0	0	0	sp|P06709|BIRA_ECOLIBifunctionalligase/repressorBirAOS=Escherichiacoli(strainK12)GN=birAPE=1SV=1	sp|P06709|BIRA_ECOLIBifunctionalligase/repressorBirAOS=Escherichiacoli(strainK12)GN=birAPE=1SV=1	sp|P06709|BIRA_ECOLIBifunctionalligase/repressorBirAOS=Escherichiacoli(strainK12)GN=birAPE=1SV=1	MSMS	12_J3_	BirADtBio100_DtDigest	596.977	3	596.975	1787.9	NaN	NaN	NaN	NaN	NaN	NaN	NaN	NaN	99.784	1	99.784	99.284	100.28	0								0	0	0	0.01	1	12171
TGDAAQIVIGAGINMAMRR	19	Unmodified	_TGDAAQIVIGAGINMAMRR_					0	0	0	0	1	sp|P06709|BIRA_ECOLIBifunctionalligase/repressorBirAOS=Escherichiacoli(strainK12)GN=birAPE=1SV=1	sp|P06709|BIRA_ECOLIBifunctionalligase/repressorBirAOS=Escherichiacoli(strainK12)GN=birAPE=1SV=1	sp|P06709|BIRA_ECOLIBifunctionalligase/repressorBirAOS=Escherichiacoli(strainK12)GN=birAPE=1SV=1	MSMS	12_J3_	BirADtBio100_DtDigest	649.007	3	649.008	1944	NaN	NaN	NaN	NaN	NaN	NaN	NaN	NaN	86.258	1	86.258	85.758	86.758	0								0	0	0	0.01	1	10381
VEESVVNQGWITLQEAGINLDR	22	Unmodified	_VEESVVNQGWITLQEAGINLDR_					0	0	0	0	0	sp|P06709|BIRA_ECOLIBifunctionalligase/repressorBirAOS=Escherichiacoli(strainK12)GN=birAPE=1SV=1	sp|P06709|BIRA_ECOLIBifunctionalligase/repressorBirAOS=Escherichiacoli(strainK12)GN=birAPE=1SV=1	sp|P06709|BIRA_ECOLIBifunctionalligase/repressorBirAOS=Escherichiacoli(strainK12)GN=birAPE=1SV=1	MULTI-MSMS	12_J3_	BirADtBio100_DtDigest	824.428	3	824.091	2469.25	23125.2	1.9005	0.0015661	0.95737	0.00078896	2.8578	0.0023551	824.426	98.131	2.4159	98.131	97.249	99.664	0					314	70	7	0	0	0	0.01	2	11881
VEESVVNQGWITLQEAGINLDR	22	Unmodified	_VEESVVNQGWITLQEAGINLDR_					0	0	0	0	0	sp|P06709|BIRA_ECOLIBifunctionalligase/repressorBirAOS=Escherichiacoli(strainK12)GN=birAPE=1SV=1	sp|P06709|BIRA_ECOLIBifunctionalligase/repressorBirAOS=Escherichiacoli(strainK12)GN=birAPE=1SV=1	sp|P06709|BIRA_ECOLIBifunctionalligase/repressorBirAOS=Escherichiacoli(strainK12)GN=birAPE=1SV=1	MULTI-MSMS	12_J3_	BirADtBio100_DtDigest	1236.14	2	1235.63	2469.25	18894.1	3.817	0.0047164	0.078283	9.6728e-05	3.8952	0.0048131	1236.13	98.104	1.9895	98.104	97.249	99.238	-7.6294e-06					266	56	7	0	0	0	0.01	3	11882
VEESVVNQGWITLQEAGINLDR	22	Unmodified	_VEESVVNQGWITLQEAGINLDR_					0	0	0	0	0	sp|P06709|BIRA_ECOLIBifunctionalligase/repressorBirAOS=Escherichiacoli(strainK12)GN=birAPE=1SV=1	sp|P06709|BIRA_ECOLIBifunctionalligase/repressorBirAOS=Escherichiacoli(strainK12)GN=birAPE=1SV=1	sp|P06709|BIRA_ECOLIBifunctionalligase/repressorBirAOS=Escherichiacoli(strainK12)GN=birAPE=1SV=1	MULTI-MSMS	12_J3_	BirADtBio100_DtDigest	824.427	3	824.091	2469.25	23595.5	1.9219	0.0015838	-2.6446	-0.0021794	-0.72271	-0.00059558	824.756	100.18	1.1295	100.18	99.452	100.58	-7.6294e-06					118	37	5	0	0	0	0.01	1	12195
VEESVVNQGWITLQEAGINLDRNTLAAMLIR	31	Unmodified	_VEESVVNQGWITLQEAGINLDRNTLAAMLIR_					0	0	0	0	1	sp|P06709|BIRA_ECOLIBifunctionalligase/repressorBirAOS=Escherichiacoli(strainK12)GN=birAPE=1SV=1	sp|P06709|BIRA_ECOLIBifunctionalligase/repressorBirAOS=Escherichiacoli(strainK12)GN=birAPE=1SV=1	sp|P06709|BIRA_ECOLIBifunctionalligase/repressorBirAOS=Escherichiacoli(strainK12)GN=birAPE=1SV=1	MULTI-MSMS	12_J3_	BirADtBio100_DtDigest	1152.28	3	1151.94	3452.81	19486.3	3.6516	0.0042065	0.15932	0.00018353	3.8109	0.00439	1152.61	105.18	0.92625	105.18	104.83	105.76	0					110	25	6	0	0	0	0.01	1	12854
VEESVVNQGWITLQEAGINLDRNTLAAMLIR	31	Unmodified	_VEESVVNQGWITLQEAGINLDRNTLAAMLIR_					0	0	0	0	1	sp|P06709|BIRA_ECOLIBifunctionalligase/repressorBirAOS=Escherichiacoli(strainK12)GN=birAPE=1SV=1	sp|P06709|BIRA_ECOLIBifunctionalligase/repressorBirAOS=Escherichiacoli(strainK12)GN=birAPE=1SV=1	sp|P06709|BIRA_ECOLIBifunctionalligase/repressorBirAOS=Escherichiacoli(strainK12)GN=birAPE=1SV=1	MULTI-MSMS	12_J3_	BirADtBio100_DtDigest	864.462	4	864.209	3452.81	22595.6	2.3314	0.0020148	1.1137	0.00096251	3.4452	0.0029773	864.712	105.18	0.73705	105.18	104.88	105.62	0					84	19	5	0	0	0	0.01	1	12861
VKWPNDLYLQDR	12	Unmodified	_VKWPNDLYLQDR_					0	0	0	0	1	sp|P06709|BIRA_ECOLIBifunctionalligase/repressorBirAOS=Escherichiacoli(strainK12)GN=birAPE=1SV=1	sp|P06709|BIRA_ECOLIBifunctionalligase/repressorBirAOS=Escherichiacoli(strainK12)GN=birAPE=1SV=1	sp|P06709|BIRA_ECOLIBifunctionalligase/repressorBirAOS=Escherichiacoli(strainK12)GN=birAPE=1SV=1	MULTI-MSMS	12_J3_	BirADtBio100_DtDigest	774.398	2	773.904	1545.79	24394.2	1.5219	0.0011778	0.29902	0.00023141	1.821	0.0014092	773.905	75.566	3.4928	75.566	74.013	77.506	0					274	77	5	0	0	0	0.01	4	8727
VKWPNDLYLQDR	12	Unmodified	_VKWPNDLYLQDR_					0	0	0	0	1	sp|P06709|BIRA_ECOLIBifunctionalligase/repressorBirAOS=Escherichiacoli(strainK12)GN=birAPE=1SV=1	sp|P06709|BIRA_ECOLIBifunctionalligase/repressorBirAOS=Escherichiacoli(strainK12)GN=birAPE=1SV=1	sp|P06709|BIRA_ECOLIBifunctionalligase/repressorBirAOS=Escherichiacoli(strainK12)GN=birAPE=1SV=1	MULTI-MSMS	12_J3_	BirADtBio100_DtDigest	516.605	3	516.272	1545.79	29348.8	1.5592	0.00080495	0.080069	4.1337e-05	1.6392	0.00084629	516.273	75.819	5.6543	75.819	73.424	79.079	0					398	123	6	0	0	0	0.01	4	8800
VKWPNDLYLQDR	12	Unmodified	_VKWPNDLYLQDR_					0	0	0	0	1	sp|P06709|BIRA_ECOLIBifunctionalligase/repressorBirAOS=Escherichiacoli(strainK12)GN=birAPE=1SV=1	sp|P06709|BIRA_ECOLIBifunctionalligase/repressorBirAOS=Escherichiacoli(strainK12)GN=birAPE=1SV=1	sp|P06709|BIRA_ECOLIBifunctionalligase/repressorBirAOS=Escherichiacoli(strainK12)GN=birAPE=1SV=1	MULTI-SECPEP	12_J3_	BirADtBio100_DtDigest	517.522	3	516.272	1545.79	29069.8	1.3954	0.00072041	-0.75887	-0.00039178	0.63654	0.00032863	516.606	66.952	0.63966	66.952	66.451	67.091	0					17	11	2	0	0	0	0.01	1	7657
VKWPNDLYLQDR	12	Unmodified	_VKWPNDLYLQDR_					0	0	0	0	1	sp|P06709|BIRA_ECOLIBifunctionalligase/repressorBirAOS=Escherichiacoli(strainK12)GN=birAPE=1SV=1	sp|P06709|BIRA_ECOLIBifunctionalligase/repressorBirAOS=Escherichiacoli(strainK12)GN=birAPE=1SV=1	sp|P06709|BIRA_ECOLIBifunctionalligase/repressorBirAOS=Escherichiacoli(strainK12)GN=birAPE=1SV=1	MULTI-SECPEP	12_J3_	BirADtBio100_DtDigest	517.602	3	516.272	1545.79	28578.5	1.6768	0.00086566	1.2101	0.00062474	2.8869	0.0014904	516.272	79.258	1.3566	79.258	78.872	80.229	0					37	26	2	0	0	0	0.01	1	9368
VKWPNDLYLQDRK	13	Unmodified	_VKWPNDLYLQDRK_					0	0	0	0	2	sp|P06709|BIRA_ECOLIBifunctionalligase/repressorBirAOS=Escherichiacoli(strainK12)GN=birAPE=1SV=1	sp|P06709|BIRA_ECOLIBifunctionalligase/repressorBirAOS=Escherichiacoli(strainK12)GN=birAPE=1SV=1	sp|P06709|BIRA_ECOLIBifunctionalligase/repressorBirAOS=Escherichiacoli(strainK12)GN=birAPE=1SV=1	MULTI-MSMS	12_J3_	BirADtBio100_DtDigest	837.953	2	837.952	1673.89	23392.3	1.7883	0.0014985	-3.4898	-0.0029243	-1.7015	-0.0014258	838.45	74.38	1.3508	74.38	73.621	74.972	0					52	25	3	0	0	0	0.01	1	8663
VKWPNDLYLQDRK	13	Unmodified	_VKWPNDLYLQDRK_					0	0	0	0	2	sp|P06709|BIRA_ECOLIBifunctionalligase/repressorBirAOS=Escherichiacoli(strainK12)GN=birAPE=1SV=1	sp|P06709|BIRA_ECOLIBifunctionalligase/repressorBirAOS=Escherichiacoli(strainK12)GN=birAPE=1SV=1	sp|P06709|BIRA_ECOLIBifunctionalligase/repressorBirAOS=Escherichiacoli(strainK12)GN=birAPE=1SV=1	MULTI-MSMS	12_J3_	BirADtBio100_DtDigest	559.3	3	558.97	1673.89	28320.7	1.329	0.00074289	-0.42088	-0.00023526	0.90816	0.00050763	558.97	76.147	4.2368	76.147	73.745	77.982	7.6294e-06					309	92	6	0	0	0	0.01	4	8696
VKWPNDLYLQDRK	13	Unmodified	_VKWPNDLYLQDRK_					0	0	0	0	2	sp|P06709|BIRA_ECOLIBifunctionalligase/repressorBirAOS=Escherichiacoli(strainK12)GN=birAPE=1SV=1	sp|P06709|BIRA_ECOLIBifunctionalligase/repressorBirAOS=Escherichiacoli(strainK12)GN=birAPE=1SV=1	sp|P06709|BIRA_ECOLIBifunctionalligase/repressorBirAOS=Escherichiacoli(strainK12)GN=birAPE=1SV=1	MULTI-MSMS	12_J3_	BirADtBio100_DtDigest	419.48	4	419.48	1673.89	32788.9	2.1091	0.0008847	0.036159	1.5168e-05	2.1452	0.00089987	419.48	76.109	3.616	76.109	74.509	78.125	0					288	80	6	0	0	0	0.01	3	8852
VKWPNDLYLQDRK	13	Unmodified	_VKWPNDLYLQDRK_					0	0	0	0	2	sp|P06709|BIRA_ECOLIBifunctionalligase/repressorBirAOS=Escherichiacoli(strainK12)GN=birAPE=1SV=1	sp|P06709|BIRA_ECOLIBifunctionalligase/repressorBirAOS=Escherichiacoli(strainK12)GN=birAPE=1SV=1	sp|P06709|BIRA_ECOLIBifunctionalligase/repressorBirAOS=Escherichiacoli(strainK12)GN=birAPE=1SV=1	MULTI-MSMS	12_J3_	BirADtBio100_DtDigest	837.955	2	837.952	1673.89	22873.7	1.8228	0.0015274	0.47559	0.00039852	2.2984	0.001926	837.952	76.121	1.7272	76.121	75.188	76.915	0					104	39	3	0	0	0	0.01	2	8894
VKWPNDLYLQDRK	13	Unmodified	_VKWPNDLYLQDRK_					0	0	0	0	2	sp|P06709|BIRA_ECOLIBifunctionalligase/repressorBirAOS=Escherichiacoli(strainK12)GN=birAPE=1SV=1	sp|P06709|BIRA_ECOLIBifunctionalligase/repressorBirAOS=Escherichiacoli(strainK12)GN=birAPE=1SV=1	sp|P06709|BIRA_ECOLIBifunctionalligase/repressorBirAOS=Escherichiacoli(strainK12)GN=birAPE=1SV=1	MULTI-SECPEP	12_J3_	BirADtBio100_DtDigest	420.73	4	419.48	1673.89	34246.9	2.0016	0.00083963	0.38492	0.00016147	2.3865	0.0010011	419.731	70.432	1.6993	70.432	69.493	71.192	0					59	38	2	0	0	0	0.01	1	8241
VKWPNDLYLQDRK	13	Unmodified	_VKWPNDLYLQDRK_					0	0	0	0	2	sp|P06709|BIRA_ECOLIBifunctionalligase/repressorBirAOS=Escherichiacoli(strainK12)GN=birAPE=1SV=1	sp|P06709|BIRA_ECOLIBifunctionalligase/repressorBirAOS=Escherichiacoli(strainK12)GN=birAPE=1SV=1	sp|P06709|BIRA_ECOLIBifunctionalligase/repressorBirAOS=Escherichiacoli(strainK12)GN=birAPE=1SV=1	MULTI-SECPEP	12_J3_	BirADtBio100_DtDigest	418.225	4	419.48	1673.89	33816.6	2.0489	0.00085947	-0.1653	-6.9338e-05	1.8836	0.00079013	419.479	72.821	1.7299	72.821	72.283	74.013	0					48	31	2	0	0	0	0.01	1	8673
VKWPNDLYLQDRK	13	Unmodified	_VKWPNDLYLQDRK_					0	0	0	0	2	sp|P06709|BIRA_ECOLIBifunctionalligase/repressorBirAOS=Escherichiacoli(strainK12)GN=birAPE=1SV=1	sp|P06709|BIRA_ECOLIBifunctionalligase/repressorBirAOS=Escherichiacoli(strainK12)GN=birAPE=1SV=1	sp|P06709|BIRA_ECOLIBifunctionalligase/repressorBirAOS=Escherichiacoli(strainK12)GN=birAPE=1SV=1	MULTI-SECPEP	12_J3_	BirADtBio100_DtDigest	560.31	3	558.97	1673.89	28580	1.2694	0.00070954	0.63962	0.00035753	1.909	0.0010671	559.305	72.949	1.0955	72.949	72.329	73.424	0					31	20	2	0	0	0	0.01	1	8424
VRVKWPNDLYLQDR	14	Unmodified	_VRVKWPNDLYLQDR_					0	0	0	0	2	sp|P06709|BIRA_ECOLIBifunctionalligase/repressorBirAOS=Escherichiacoli(strainK12)GN=birAPE=1SV=1	sp|P06709|BIRA_ECOLIBifunctionalligase/repressorBirAOS=Escherichiacoli(strainK12)GN=birAPE=1SV=1	sp|P06709|BIRA_ECOLIBifunctionalligase/repressorBirAOS=Escherichiacoli(strainK12)GN=birAPE=1SV=1	MULTI-SECPEP	12_J3_	BirADtBio100_DtDigest	452.276	4	451.248	1800.96	32226.3	1.96	0.00088442	4.0463	0.0018259	6.0063	0.0027103	451.5	76.96	0.8037	76.96	76.6	77.404	0					25	18	2	0	0	0	0.01	1	9151
WEKLDNFINRPVK	13	Unmodified	_WEKLDNFINRPVK_					0	0	0	0	2	sp|P06709|BIRA_ECOLIBifunctionalligase/repressorBirAOS=Escherichiacoli(strainK12)GN=birAPE=1SV=1	sp|P06709|BIRA_ECOLIBifunctionalligase/repressorBirAOS=Escherichiacoli(strainK12)GN=birAPE=1SV=1	sp|P06709|BIRA_ECOLIBifunctionalligase/repressorBirAOS=Escherichiacoli(strainK12)GN=birAPE=1SV=1	MULTI-MSMS	12_J3_	BirADtBio100_DtDigest	553.969	3	553.639	1657.89	28544.2	1.4165	0.00078421	-0.28926	-0.00016015	1.1272	0.00062406	553.639	77.878	3.6239	77.878	76.214	79.838	-7.6294e-06					303	79	5	0	0	0	0.01	3	9053
WEKLDNFINRPVK	13	Unmodified	_WEKLDNFINRPVK_					0	0	0	0	2	sp|P06709|BIRA_ECOLIBifunctionalligase/repressorBirAOS=Escherichiacoli(strainK12)GN=birAPE=1SV=1	sp|P06709|BIRA_ECOLIBifunctionalligase/repressorBirAOS=Escherichiacoli(strainK12)GN=birAPE=1SV=1	sp|P06709|BIRA_ECOLIBifunctionalligase/repressorBirAOS=Escherichiacoli(strainK12)GN=birAPE=1SV=1	MULTI-MSMS	12_J3_	BirADtBio100_DtDigest	415.482	4	415.481	1657.89	32731.9	2.1905	0.0009101	0.12366	5.1379e-05	2.3141	0.00096148	415.481	77.84	3.404	77.84	76.711	80.115	0					258	75	5	0	0	0	0.01	3	9120
WPNDLYLQDR	10	Unmodified	_WPNDLYLQDR_					0	0	0	0	0	sp|P06709|BIRA_ECOLIBifunctionalligase/repressorBirAOS=Escherichiacoli(strainK12)GN=birAPE=1SV=1	sp|P06709|BIRA_ECOLIBifunctionalligase/repressorBirAOS=Escherichiacoli(strainK12)GN=birAPE=1SV=1	sp|P06709|BIRA_ECOLIBifunctionalligase/repressorBirAOS=Escherichiacoli(strainK12)GN=birAPE=1SV=1	MULTI-MSMS	12_J3_	BirADtBio100_DtDigest	660.321	2	660.323	1318.63	25776.5	0.90991	0.00060084	0.34569	0.00022826	1.2556	0.0008291	660.323	70.98	2.4697	70.98	69.343	71.813	0					209	54	5	0	0	0	0.01	3	8049
WPNDLYLQDRK	11	Unmodified	_WPNDLYLQDRK_					0	0	0	0	1	sp|P06709|BIRA_ECOLIBifunctionalligase/repressorBirAOS=Escherichiacoli(strainK12)GN=birAPE=1SV=1	sp|P06709|BIRA_ECOLIBifunctionalligase/repressorBirAOS=Escherichiacoli(strainK12)GN=birAPE=1SV=1	sp|P06709|BIRA_ECOLIBifunctionalligase/repressorBirAOS=Escherichiacoli(strainK12)GN=birAPE=1SV=1	MULTI-MSMS	12_J3_	BirADtBio100_DtDigest	483.249	3	483.249	1446.73	30327.7	1.6589	0.00080166	-1.2005	-0.00058013	0.45842	0.00022153	483.248	71.182	1.9595	71.182	70.277	72.236	-7.6294e-06					143	44	4	0	0	0	0.01	2	8209
WPNDLYLQDRK	11	Unmodified	_WPNDLYLQDRK_					0	0	0	0	1	sp|P06709|BIRA_ECOLIBifunctionalligase/repressorBirAOS=Escherichiacoli(strainK12)GN=birAPE=1SV=1	sp|P06709|BIRA_ECOLIBifunctionalligase/repressorBirAOS=Escherichiacoli(strainK12)GN=birAPE=1SV=1	sp|P06709|BIRA_ECOLIBifunctionalligase/repressorBirAOS=Escherichiacoli(strainK12)GN=birAPE=1SV=1	MULTI-MSMS	12_J3_	BirADtBio100_DtDigest	724.372	2	724.37	1446.73	24633.4	1.2101	0.00087657	0.7817	0.00056624	1.9918	0.0014428	724.371	71.08	1.2506	71.08	70.613	71.864	-7.6294e-06					61	28	3	0	0	0	0.01	1	8280
[truncated: 15 more columns]
